# Supplementary material for: Androgen-regulated transcription of ESRP2 drives alternative splicing patterns in prostate cancer
Source: eLife journal article supplement (doi:10.7554/elife.47678), 2019-09-03
Supplement: supp [file elife-47678-supp-v1.zip]

Archive with 13 entries (13 files):
- elife_poa_e47678_Figure_5_source_data_1.docx
- elife_poa_e47678_Figure_3_source_data_2.xlsx
- elife_poa_e47678_Figure_2_figure_supplement_2.pdf
- elife_poa_e47678_Figure_5_figure_supplement_2.pdf
- elife_poa_e47678_Figure_5_figure_supplement_1.pdf
- elife_poa_e47678_Figure_3_source_data_1.xlsx
- elife_poa_e47678_Figure_6_figure_supplement_2.pdf
- elife_poa_e47678_Figure_2_figure_supplement_1.pdf
- elife_poa_e47678_Figure_1_figure_supplement_1.pdf
- elife_poa_e47678_Figure_6_figure_supplement_1.pdf
- elife_poa_e47678_Figure_5_source_data_2.docx
- elife_poa_e47678_Transparent_Reporting_File.pdf
- elife_poa_e47678_Figure_5_source_data_3.docx
