# Supplementary material for: Androgen-regulated transcription of ESRP2 drives alternative splicing patterns in prostate cancer
Source: eLife journal article supplement (doi:10.7554/elife.47678), 2019-09-03
Supplement: supp [file elife-47678-supp-v1.zip]

A. Cell growth assay in PC3 cells overexpressing ESRP proteins

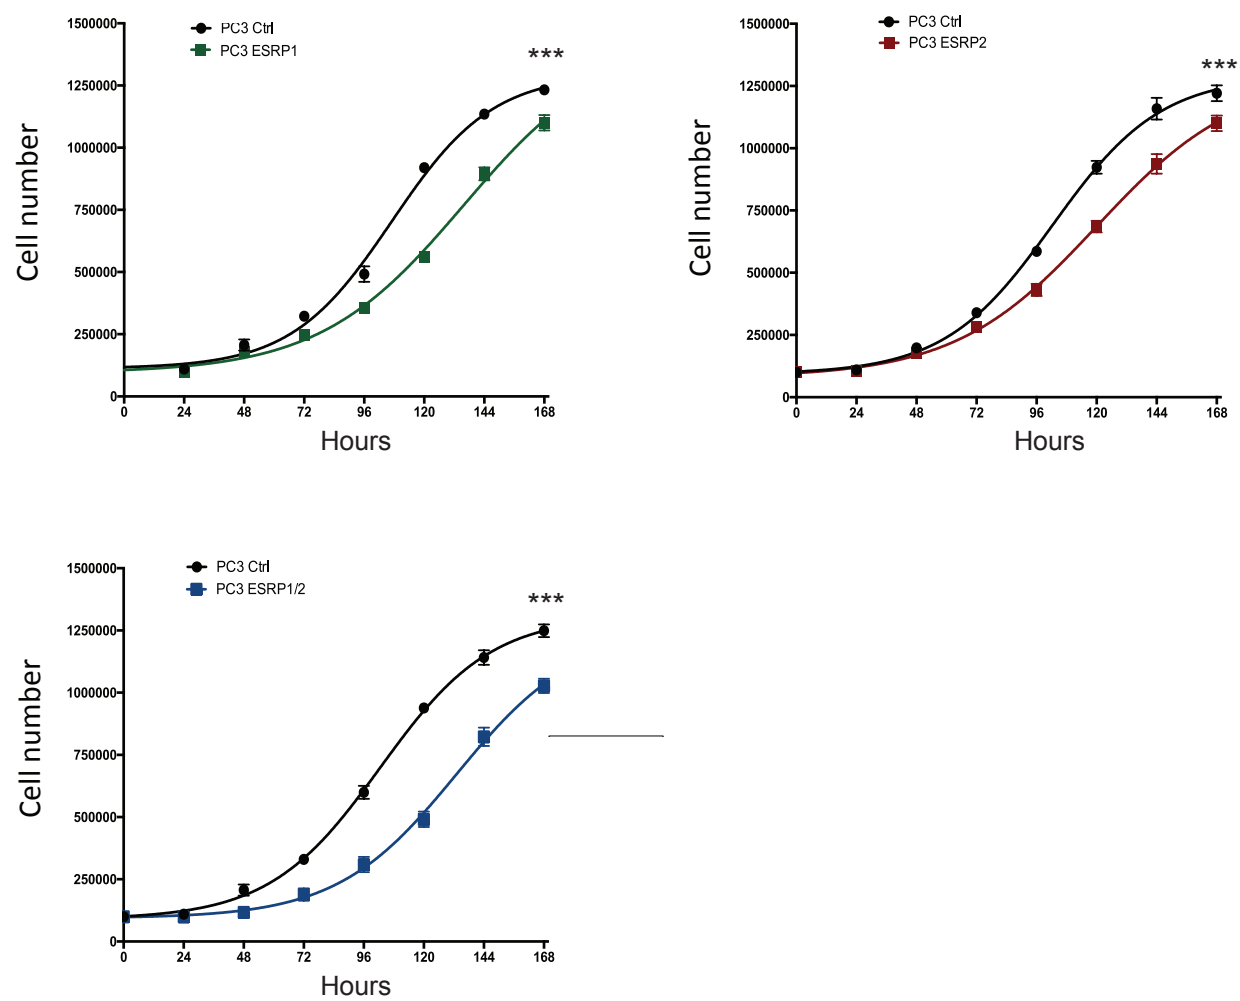

B. Cell growth assay in DU145 cells overexpressing ESRP proteins

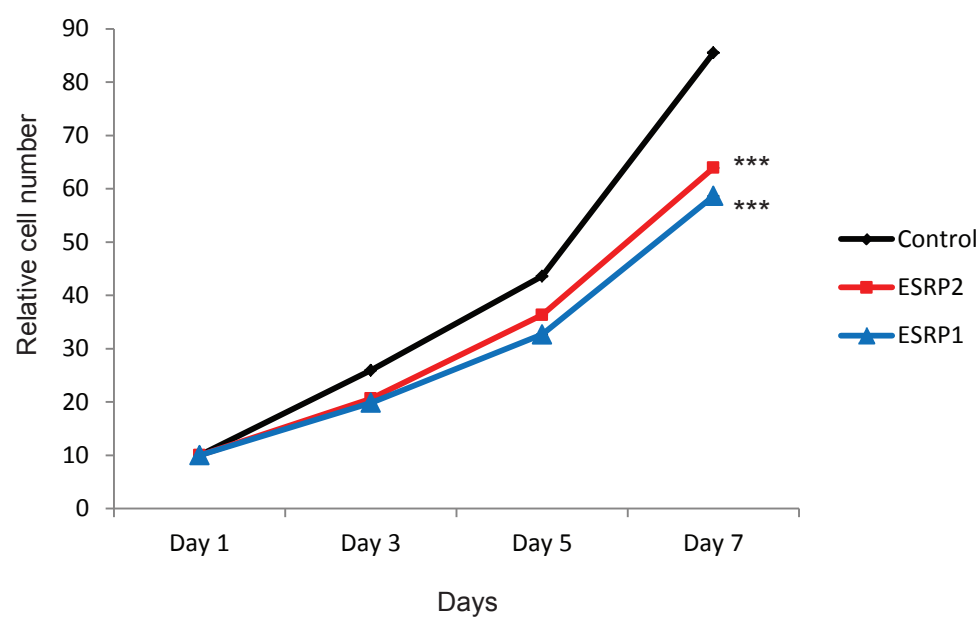

Figure 2 -figure supplement 2 *In vitro* cell proliferation of PC3 and DU145 cells overexpressing ESRP1 or ESRP2
