# Supplementary material for: Androgen-regulated transcription of ESRP2 drives alternative splicing patterns in prostate cancer
Source: eLife journal article supplement (doi:10.7554/elife.47678), 2019-09-03
Supplement: supp [file elife-47678-supp-v1.zip › elife_poa_e47678_Figure_1_figure_supplement_1.pdf]

A. Detection of overexpressed protein by western blot

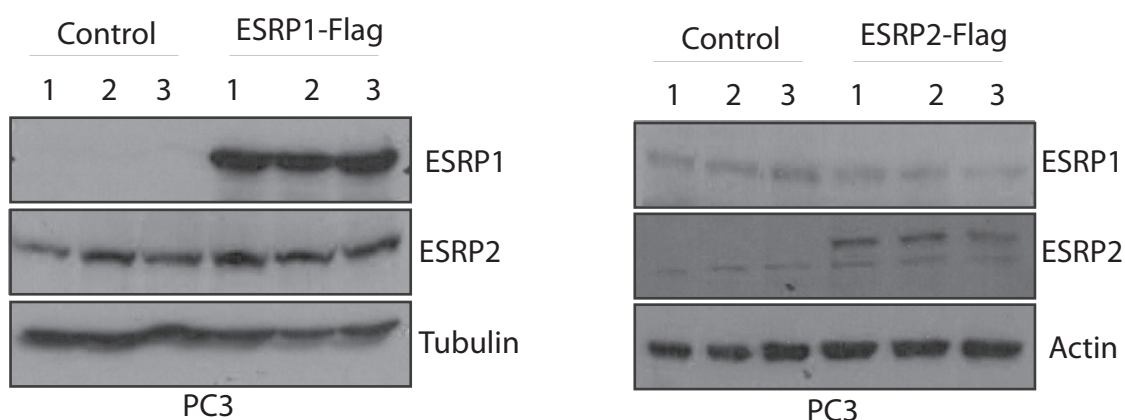

B. Detection of siRNA mediated protein depletion by western blot

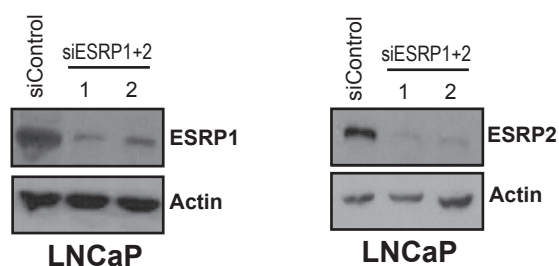

C. Detection of overexpressed protein in FFPE cell pellets by IHC

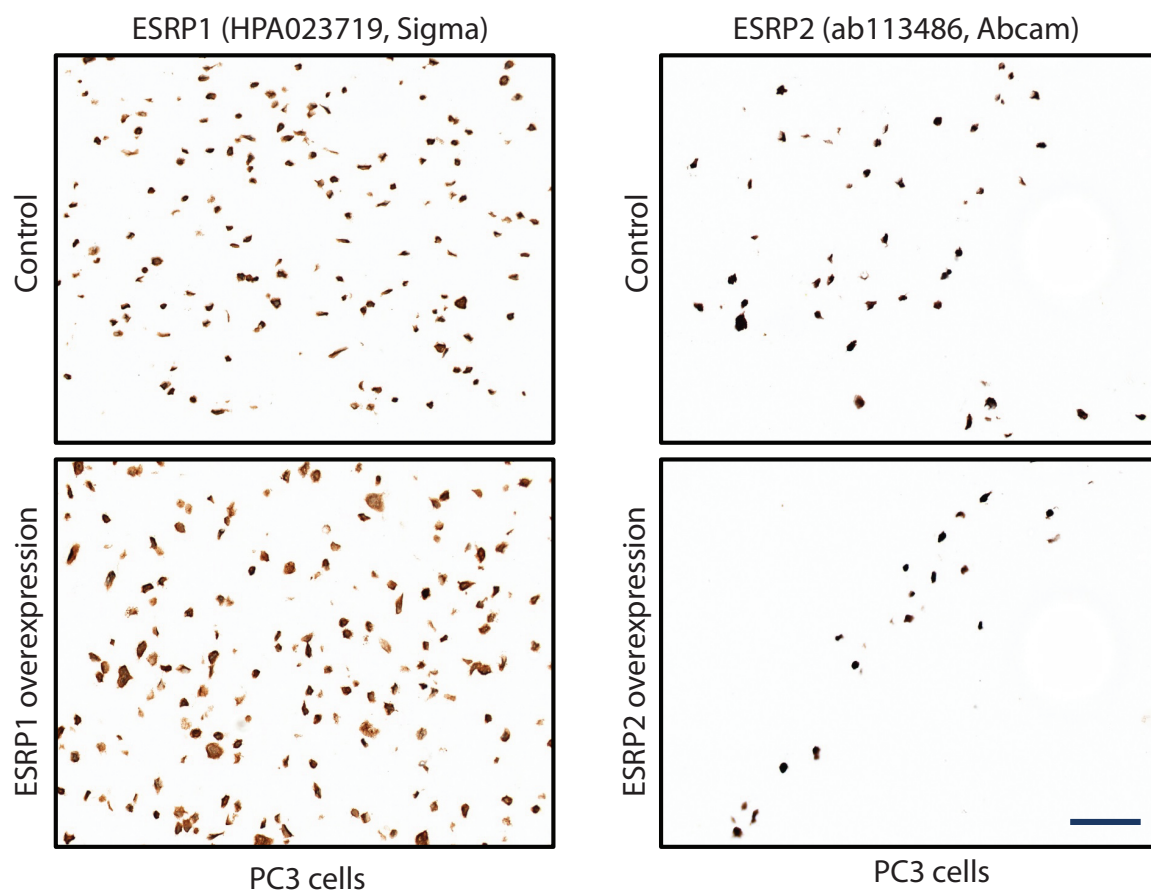

Scale bar represents 80μM

**Figure 1-Figure supplement 1** Antibody validation by western blot and IHC
