# Supplementary material for: Androgen-regulated transcription of ESRP2 drives alternative splicing patterns in prostate cancer
Source: eLife journal article supplement (doi:10.7554/elife.47678), 2019-09-03
Supplement: supp [file elife-47678-supp-v1.zip › elife_poa_e47678_Figure_3_source_data_1.xlsx]

## Sheet: significant_suppa_events
event	dPSI	pval	gene	event_type	entrez	symbol	chr	start	end	strand	biotype	description	gb_link
ENSG00000001461.16;AL:chr1:24464120-24466004:24466310:24464120-24468986:24469307:+	-0.202041	0.021978	ENSG00000001461	AL	57185	NIPAL3	1	24415794	24472976	1	protein_coding	NIPA like domain containing 3 [Source:HGNC Symbol;Acc:HGNC:25233]	http://genome-euro.ucsc.edu/cgi-bin/hgTracks?hgS_doOtherUser=submit&hgS_otherUserName=sjcockell&hgS_otherUserSessionName=SuppaResults&position=chr1:24415794-24472976
ENSG00000001461.16;AL:chr1:24464120-24466004:24466310:24464120-24468986:24472976:+	-0.171081	0.01998	ENSG00000001461	AL	57185	NIPAL3	1	24415794	24472976	1	protein_coding	NIPA like domain containing 3 [Source:HGNC Symbol;Acc:HGNC:25233]	http://genome-euro.ucsc.edu/cgi-bin/hgTracks?hgS_doOtherUser=submit&hgS_otherUserName=sjcockell&hgS_otherUserSessionName=SuppaResults&position=chr1:24415794-24472976
ENSG00000001461.16;SE:chr1:24419640-24433104:24433213-24440172:+	0.120336	0.021978	ENSG00000001461	SE	57185	NIPAL3	1	24415794	24472976	1	protein_coding	NIPA like domain containing 3 [Source:HGNC Symbol;Acc:HGNC:25233]	http://genome-euro.ucsc.edu/cgi-bin/hgTracks?hgS_doOtherUser=submit&hgS_otherUserName=sjcockell&hgS_otherUserSessionName=SuppaResults&position=chr1:24415794-24472976
ENSG00000003436.15;AF:chr2:187503770-187513616:187513653:187503770-187554200:187554492:-	-0.116555	0.0494505	ENSG00000003436	AF	7035	TFPI	2	187464230	187565760	-1	protein_coding	tissue factor pathway inhibitor [Source:HGNC Symbol;Acc:HGNC:11760]	http://genome-euro.ucsc.edu/cgi-bin/hgTracks?hgS_doOtherUser=submit&hgS_otherUserName=sjcockell&hgS_otherUserSessionName=SuppaResults&position=chr2:187464230-187565760
ENSG00000003436.15;MX:chr2:187503770-187513616:187513646-187554200:187503770-187529364:187529485-187554200:-	0.118822	0.0494505	ENSG00000003436	MX	7035	TFPI	2	187464230	187565760	-1	protein_coding	tissue factor pathway inhibitor [Source:HGNC Symbol;Acc:HGNC:11760]	http://genome-euro.ucsc.edu/cgi-bin/hgTracks?hgS_doOtherUser=submit&hgS_otherUserName=sjcockell&hgS_otherUserSessionName=SuppaResults&position=chr2:187464230-187565760
ENSG00000004660.14;AF:chr17:3885730-3890693:3890743:3885730-3892939:3893044:-	0.156249	0.0499501	ENSG00000004660	AF	84254	CAMKK1	17	3860315	3894891	-1	protein_coding	calcium/calmodulin dependent protein kinase kinase 1 [Source:HGNC Symbol;Acc:HGNC:1469]	http://genome-euro.ucsc.edu/cgi-bin/hgTracks?hgS_doOtherUser=submit&hgS_otherUserName=sjcockell&hgS_otherUserSessionName=SuppaResults&position=chr17:3860315-3894891
ENSG00000004660.14;AF:chr17:3885730-3890693:3890743:3885730-3894227:3894891:-	0.255579	0.0499501	ENSG00000004660	AF	84254	CAMKK1	17	3860315	3894891	-1	protein_coding	calcium/calmodulin dependent protein kinase kinase 1 [Source:HGNC Symbol;Acc:HGNC:1469]	http://genome-euro.ucsc.edu/cgi-bin/hgTracks?hgS_doOtherUser=submit&hgS_otherUserName=sjcockell&hgS_otherUserSessionName=SuppaResults&position=chr17:3860315-3894891
ENSG00000007255.10;A5:chr19:45164970-45178093:45164970-45178135:-	0.196928	0.020979	ENSG00000007255	A5	79090	TRAPPC6A	19	45162928	45178237	-1	protein_coding	trafficking protein particle complex 6A [Source:HGNC Symbol;Acc:HGNC:23069]	http://genome-euro.ucsc.edu/cgi-bin/hgTracks?hgS_doOtherUser=submit&hgS_otherUserName=sjcockell&hgS_otherUserSessionName=SuppaResults&position=chr19:45162928-45178237
ENSG00000007255.10;SE:chr19:45164970-45165127:45165194-45178135:-	0.144353	0.020979	ENSG00000007255	SE	79090	TRAPPC6A	19	45162928	45178237	-1	protein_coding	trafficking protein particle complex 6A [Source:HGNC Symbol;Acc:HGNC:23069]	http://genome-euro.ucsc.edu/cgi-bin/hgTracks?hgS_doOtherUser=submit&hgS_otherUserName=sjcockell&hgS_otherUserSessionName=SuppaResults&position=chr19:45162928-45178237
ENSG00000010244.18;SE:chr17:32365487-32366665:32366757-32367772:+	-0.109992	0	ENSG00000010244	SE	7756	ZNF207	17	32350117	32381886	1	protein_coding	zinc finger protein 207 [Source:HGNC Symbol;Acc:HGNC:12998]	http://genome-euro.ucsc.edu/cgi-bin/hgTracks?hgS_doOtherUser=submit&hgS_otherUserName=sjcockell&hgS_otherUserSessionName=SuppaResults&position=chr17:32350117-32381886
ENSG00000011347.9;SE:chr11:61533124-61546031:61546255-61547177:-	0.591953	0.00799201	ENSG00000011347	SE	9066	SYT7	11	61515313	61581148	-1	protein_coding	synaptotagmin 7 [Source:HGNC Symbol;Acc:HGNC:11514]	http://genome-euro.ucsc.edu/cgi-bin/hgTracks?hgS_doOtherUser=submit&hgS_otherUserName=sjcockell&hgS_otherUserSessionName=SuppaResults&position=chr11:61515313-61581148
ENSG00000049283.17;A3:chr17:50539315-50540204:50539315-50540247:+	0.132788	0.0371628	ENSG00000049283	A3	55040	EPN3	17	50532543	50543750	1	protein_coding	epsin 3 [Source:HGNC Symbol;Acc:HGNC:18235]	http://genome-euro.ucsc.edu/cgi-bin/hgTracks?hgS_doOtherUser=submit&hgS_otherUserName=sjcockell&hgS_otherUserSessionName=SuppaResults&position=chr17:50532543-50543750
ENSG00000049283.17;A5:chr17:50532985-50536421:50532844-50536421:+	0.114142	0.0371628	ENSG00000049283	A5	55040	EPN3	17	50532543	50543750	1	protein_coding	epsin 3 [Source:HGNC Symbol;Acc:HGNC:18235]	http://genome-euro.ucsc.edu/cgi-bin/hgTracks?hgS_doOtherUser=submit&hgS_otherUserName=sjcockell&hgS_otherUserSessionName=SuppaResults&position=chr17:50532543-50543750
ENSG00000049283.17;SE:chr17:50538197-50538884:50538964-50539187:+	0.147246	0.0371628	ENSG00000049283	SE	55040	EPN3	17	50532543	50543750	1	protein_coding	epsin 3 [Source:HGNC Symbol;Acc:HGNC:18235]	http://genome-euro.ucsc.edu/cgi-bin/hgTracks?hgS_doOtherUser=submit&hgS_otherUserName=sjcockell&hgS_otherUserSessionName=SuppaResults&position=chr17:50532543-50543750
ENSG00000049283.17;SE:chr17:50539315-50540204:50540334-50540793:+	0.270549	0.030969	ENSG00000049283	SE	55040	EPN3	17	50532543	50543750	1	protein_coding	epsin 3 [Source:HGNC Symbol;Acc:HGNC:18235]	http://genome-euro.ucsc.edu/cgi-bin/hgTracks?hgS_doOtherUser=submit&hgS_otherUserName=sjcockell&hgS_otherUserSessionName=SuppaResults&position=chr17:50532543-50543750
ENSG00000049283.17;SE:chr17:50539315-50540247:50540334-50540793:+	0.11606	0.0371628	ENSG00000049283	SE	55040	EPN3	17	50532543	50543750	1	protein_coding	epsin 3 [Source:HGNC Symbol;Acc:HGNC:18235]	http://genome-euro.ucsc.edu/cgi-bin/hgTracks?hgS_doOtherUser=submit&hgS_otherUserName=sjcockell&hgS_otherUserSessionName=SuppaResults&position=chr17:50532543-50543750
ENSG00000051009.10;A5:chr11:6218150-6218558:6218150-6218600:-	0.110822	0.033966	ENSG00000051009	A5	84067	FAM160A2	11	6211335	6234711	-1	protein_coding	family with sequence similarity 160 member A2 [Source:HGNC Symbol;Acc:HGNC:25378]	http://genome-euro.ucsc.edu/cgi-bin/hgTracks?hgS_doOtherUser=submit&hgS_otherUserName=sjcockell&hgS_otherUserSessionName=SuppaResults&position=chr11:6211335-6234711
ENSG00000065268.10;SE:chr19:992121-994020:994088-994213:+	0.126282	0.00599401	ENSG00000065268	SE	57418	WDR18	19	984271	998438	1	protein_coding	WD repeat domain 18 [Source:HGNC Symbol;Acc:HGNC:17956]	http://genome-euro.ucsc.edu/cgi-bin/hgTracks?hgS_doOtherUser=submit&hgS_otherUserName=sjcockell&hgS_otherUserSessionName=SuppaResults&position=chr19:984271-998438
ENSG00000065613.13;SE:chr10:104008356-104010816:104010908-104018160:+	0.494691	0	ENSG00000065613	SE	9748	SLK	10	103967201	104029233	1	protein_coding	STE20 like kinase [Source:HGNC Symbol;Acc:HGNC:11088]	http://genome-euro.ucsc.edu/cgi-bin/hgTracks?hgS_doOtherUser=submit&hgS_otherUserName=sjcockell&hgS_otherUserSessionName=SuppaResults&position=chr10:103967201-104029233
ENSG00000069206.15;SE:chr8:24501576-24506091:24506156-24507480:+	0.222126	0.00999001	ENSG00000069206	SE	8756	ADAM7	8	24440930	24526970	1	protein_coding	ADAM metallopeptidase domain 7 [Source:HGNC Symbol;Acc:HGNC:214]	http://genome-euro.ucsc.edu/cgi-bin/hgTracks?hgS_doOtherUser=submit&hgS_otherUserName=sjcockell&hgS_otherUserSessionName=SuppaResults&position=chr8:24440930-24526970
ENSG00000070831.15;AF:chr1:22052627:22052868-22078429:22053297:22053433-22078429:+	0.255838	0.031635	ENSG00000070831	AF	998	CDC42	1	22052627	22092946	1	protein_coding	cell division cycle 42 [Source:HGNC Symbol;Acc:HGNC:1736]	http://genome-euro.ucsc.edu/cgi-bin/hgTracks?hgS_doOtherUser=submit&hgS_otherUserName=sjcockell&hgS_otherUserSessionName=SuppaResults&position=chr1:22052627-22092946
ENSG00000070831.15;AF:chr1:22052707:22052742-22078429:22053297:22053433-22078429:+	0.260707	0.031635	ENSG00000070831	AF	998	CDC42	1	22052627	22092946	1	protein_coding	cell division cycle 42 [Source:HGNC Symbol;Acc:HGNC:1736]	http://genome-euro.ucsc.edu/cgi-bin/hgTracks?hgS_doOtherUser=submit&hgS_otherUserName=sjcockell&hgS_otherUserSessionName=SuppaResults&position=chr1:22052627-22092946
ENSG00000070831.15;AL:chr1:22086866-22089943:22090804:22086866-22091428:22092923:+	-0.179686	0.031635	ENSG00000070831	AL	998	CDC42	1	22052627	22092946	1	protein_coding	cell division cycle 42 [Source:HGNC Symbol;Acc:HGNC:1736]	http://genome-euro.ucsc.edu/cgi-bin/hgTracks?hgS_doOtherUser=submit&hgS_otherUserName=sjcockell&hgS_otherUserSessionName=SuppaResults&position=chr1:22052627-22092946
ENSG00000073584.19;AF:chr17:40645847-40647240:40647347:40645847-40647453:40647641:-	0.270192	0.0483683	ENSG00000073584	AF	6605	SMARCE1	17	40624962	40648508	-1	protein_coding	SWI/SNF related, matrix associated, actin dependent regulator of chromatin, subfamily e, member 1 [Source:HGNC Symbol;Acc:HGNC:11109]	http://genome-euro.ucsc.edu/cgi-bin/hgTracks?hgS_doOtherUser=submit&hgS_otherUserName=sjcockell&hgS_otherUserSessionName=SuppaResults&position=chr17:40624962-40648508
ENSG00000073584.19;AF:chr17:40645847-40647240:40647347:40645847-40647773:40647837:-	0.148842	0.0483683	ENSG00000073584	AF	6605	SMARCE1	17	40624962	40648508	-1	protein_coding	SWI/SNF related, matrix associated, actin dependent regulator of chromatin, subfamily e, member 1 [Source:HGNC Symbol;Acc:HGNC:11109]	http://genome-euro.ucsc.edu/cgi-bin/hgTracks?hgS_doOtherUser=submit&hgS_otherUserName=sjcockell&hgS_otherUserSessionName=SuppaResults&position=chr17:40624962-40648508
ENSG00000073584.19;AF:chr17:40645847-40647240:40647347:40645847-40647773:40647848:-	0.240566	0.0414585	ENSG00000073584	AF	6605	SMARCE1	17	40624962	40648508	-1	protein_coding	SWI/SNF related, matrix associated, actin dependent regulator of chromatin, subfamily e, member 1 [Source:HGNC Symbol;Acc:HGNC:11109]	http://genome-euro.ucsc.edu/cgi-bin/hgTracks?hgS_doOtherUser=submit&hgS_otherUserName=sjcockell&hgS_otherUserSessionName=SuppaResults&position=chr17:40624962-40648508
ENSG00000073584.19;AF:chr17:40645847-40647240:40647347:40645847-40647773:40648864:-	0.268673	0.0483683	ENSG00000073584	AF	6605	SMARCE1	17	40624962	40648508	-1	protein_coding	SWI/SNF related, matrix associated, actin dependent regulator of chromatin, subfamily e, member 1 [Source:HGNC Symbol;Acc:HGNC:11109]	http://genome-euro.ucsc.edu/cgi-bin/hgTracks?hgS_doOtherUser=submit&hgS_otherUserName=sjcockell&hgS_otherUserSessionName=SuppaResults&position=chr17:40624962-40648508
ENSG00000073584.19;AF:chr17:40645847-40647453:40647641:40645847-40647773:40647837:-	-0.14935	0.0483683	ENSG00000073584	AF	6605	SMARCE1	17	40624962	40648508	-1	protein_coding	SWI/SNF related, matrix associated, actin dependent regulator of chromatin, subfamily e, member 1 [Source:HGNC Symbol;Acc:HGNC:11109]	http://genome-euro.ucsc.edu/cgi-bin/hgTracks?hgS_doOtherUser=submit&hgS_otherUserName=sjcockell&hgS_otherUserSessionName=SuppaResults&position=chr17:40624962-40648508
ENSG00000073584.19;AF:chr17:40645847-40647453:40647641:40645847-40647773:40647844:-	-0.154255	0.0483683	ENSG00000073584	AF	6605	SMARCE1	17	40624962	40648508	-1	protein_coding	SWI/SNF related, matrix associated, actin dependent regulator of chromatin, subfamily e, member 1 [Source:HGNC Symbol;Acc:HGNC:11109]	http://genome-euro.ucsc.edu/cgi-bin/hgTracks?hgS_doOtherUser=submit&hgS_otherUserName=sjcockell&hgS_otherUserSessionName=SuppaResults&position=chr17:40624962-40648508
ENSG00000078699.21;AF:chr20:33562365:33562674-33606956:33600336:33600465-33606956:+	-0.192643	0.03996	ENSG00000078699	AF	9139	CBFA2T2	20	33490075	33650036	1	protein_coding	CBFA2/RUNX1 translocation partner 2 [Source:HGNC Symbol;Acc:HGNC:1536]	http://genome-euro.ucsc.edu/cgi-bin/hgTracks?hgS_doOtherUser=submit&hgS_otherUserName=sjcockell&hgS_otherUserSessionName=SuppaResults&position=chr20:33490075-33650036
ENSG00000079805.16;AL:chr19:10830378-10830978:10831884:10830378-10832992:10833488:+	-0.229099	0.0344655	ENSG00000079805	AL	1785	DNM2	19	10718079	10833488	1	protein_coding	dynamin 2 [Source:HGNC Symbol;Acc:HGNC:2974]	http://genome-euro.ucsc.edu/cgi-bin/hgTracks?hgS_doOtherUser=submit&hgS_otherUserName=sjcockell&hgS_otherUserSessionName=SuppaResults&position=chr19:10718079-10833488
ENSG00000080603.16;AF:chr16:30698209:30698461-30699908:30699141:30699242-30699908:+	-0.122549	0.042957	ENSG00000080603	AF	10847	SRCAP	16	30698209	30741409	1	protein_coding	Snf2 related CREBBP activator protein [Source:HGNC Symbol;Acc:HGNC:16974]	http://genome-euro.ucsc.edu/cgi-bin/hgTracks?hgS_doOtherUser=submit&hgS_otherUserName=sjcockell&hgS_otherUserSessionName=SuppaResults&position=chr16:30698209-30741409
ENSG00000082153.17;AF:chr2:200810594:200810697-200813208:200811546:200811727-200813208:+	-0.127872	0.0233766	ENSG00000082153	AF	9689	BZW1	2	200810594	200827338	1	protein_coding	basic leucine zipper and W2 domains 1 [Source:HGNC Symbol;Acc:HGNC:18380]	http://genome-euro.ucsc.edu/cgi-bin/hgTracks?hgS_doOtherUser=submit&hgS_otherUserName=sjcockell&hgS_otherUserSessionName=SuppaResults&position=chr2:200810594-200827338
ENSG00000082153.17;AF:chr2:200810594:200810697-200813208:200811546:200811990-200813208:+	-0.100635	0.0233766	ENSG00000082153	AF	9689	BZW1	2	200810594	200827338	1	protein_coding	basic leucine zipper and W2 domains 1 [Source:HGNC Symbol;Acc:HGNC:18380]	http://genome-euro.ucsc.edu/cgi-bin/hgTracks?hgS_doOtherUser=submit&hgS_otherUserName=sjcockell&hgS_otherUserSessionName=SuppaResults&position=chr2:200810594-200827338
ENSG00000082153.17;AF:chr2:200810594:200810697-200813208:200811923:200811990-200813208:+	-0.133253	0.0233766	ENSG00000082153	AF	9689	BZW1	2	200810594	200827338	1	protein_coding	basic leucine zipper and W2 domains 1 [Source:HGNC Symbol;Acc:HGNC:18380]	http://genome-euro.ucsc.edu/cgi-bin/hgTracks?hgS_doOtherUser=submit&hgS_otherUserName=sjcockell&hgS_otherUserSessionName=SuppaResults&position=chr2:200810594-200827338
ENSG00000082153.17;AF:chr2:200810594:200810697-200813208:200812989:200813050-200813208:+	-0.28455	0	ENSG00000082153	AF	9689	BZW1	2	200810594	200827338	1	protein_coding	basic leucine zipper and W2 domains 1 [Source:HGNC Symbol;Acc:HGNC:18380]	http://genome-euro.ucsc.edu/cgi-bin/hgTracks?hgS_doOtherUser=submit&hgS_otherUserName=sjcockell&hgS_otherUserSessionName=SuppaResults&position=chr2:200810594-200827338
ENSG00000082153.17;AF:chr2:200811546:200811727-200813208:200812989:200813050-200813208:+	-0.174299	0.0233766	ENSG00000082153	AF	9689	BZW1	2	200810594	200827338	1	protein_coding	basic leucine zipper and W2 domains 1 [Source:HGNC Symbol;Acc:HGNC:18380]	http://genome-euro.ucsc.edu/cgi-bin/hgTracks?hgS_doOtherUser=submit&hgS_otherUserName=sjcockell&hgS_otherUserSessionName=SuppaResults&position=chr2:200810594-200827338
ENSG00000082153.17;AF:chr2:200811546:200811990-200813208:200812989:200813050-200813208:+	-0.169573	0.0233766	ENSG00000082153	AF	9689	BZW1	2	200810594	200827338	1	protein_coding	basic leucine zipper and W2 domains 1 [Source:HGNC Symbol;Acc:HGNC:18380]	http://genome-euro.ucsc.edu/cgi-bin/hgTracks?hgS_doOtherUser=submit&hgS_otherUserName=sjcockell&hgS_otherUserSessionName=SuppaResults&position=chr2:200810594-200827338
ENSG00000082153.17;AF:chr2:200811910:200811990-200813208:200812989:200813050-200813208:+	-0.237499	0.00974026	ENSG00000082153	AF	9689	BZW1	2	200810594	200827338	1	protein_coding	basic leucine zipper and W2 domains 1 [Source:HGNC Symbol;Acc:HGNC:18380]	http://genome-euro.ucsc.edu/cgi-bin/hgTracks?hgS_doOtherUser=submit&hgS_otherUserName=sjcockell&hgS_otherUserSessionName=SuppaResults&position=chr2:200810594-200827338
ENSG00000082153.17;AF:chr2:200811923:200811990-200813208:200812989:200813050-200813208:+	-0.110343	0.0233766	ENSG00000082153	AF	9689	BZW1	2	200810594	200827338	1	protein_coding	basic leucine zipper and W2 domains 1 [Source:HGNC Symbol;Acc:HGNC:18380]	http://genome-euro.ucsc.edu/cgi-bin/hgTracks?hgS_doOtherUser=submit&hgS_otherUserName=sjcockell&hgS_otherUserSessionName=SuppaResults&position=chr2:200810594-200827338
ENSG00000082153.17;AF:chr2:200812676:200812885-200813208:200812989:200813050-200813208:+	-0.203283	0.0233766	ENSG00000082153	AF	9689	BZW1	2	200810594	200827338	1	protein_coding	basic leucine zipper and W2 domains 1 [Source:HGNC Symbol;Acc:HGNC:18380]	http://genome-euro.ucsc.edu/cgi-bin/hgTracks?hgS_doOtherUser=submit&hgS_otherUserName=sjcockell&hgS_otherUserSessionName=SuppaResults&position=chr2:200810594-200827338
ENSG00000084234.16;AF:chr11:130069921:130070082-130109429:130070568:130070747-130109429:+	0.316511	0	ENSG00000084234	AF	334	APLP2	11	130069837	130144811	1	protein_coding	amyloid beta precursor like protein 2 [Source:HGNC Symbol;Acc:HGNC:598]	http://genome-euro.ucsc.edu/cgi-bin/hgTracks?hgS_doOtherUser=submit&hgS_otherUserName=sjcockell&hgS_otherUserSessionName=SuppaResults&position=chr11:130069837-130144811
ENSG00000086475.14;AF:chr10:13338808-13340691:13340790:13338808-13348000:13348298:-	0.183077	0.016317	ENSG00000086475	AF	22929	SEPHS1	10	13317424	13348298	-1	protein_coding	selenophosphate synthetase 1 [Source:HGNC Symbol;Acc:HGNC:19685]	http://genome-euro.ucsc.edu/cgi-bin/hgTracks?hgS_doOtherUser=submit&hgS_otherUserName=sjcockell&hgS_otherUserSessionName=SuppaResults&position=chr10:13317424-13348298
ENSG00000086475.14;AF:chr10:13338808-13344758:13345460:13338808-13348000:13348298:-	0.258651	0.016317	ENSG00000086475	AF	22929	SEPHS1	10	13317424	13348298	-1	protein_coding	selenophosphate synthetase 1 [Source:HGNC Symbol;Acc:HGNC:19685]	http://genome-euro.ucsc.edu/cgi-bin/hgTracks?hgS_doOtherUser=submit&hgS_otherUserName=sjcockell&hgS_otherUserSessionName=SuppaResults&position=chr10:13317424-13348298
ENSG00000086475.14;SE:chr10:13338808-13344758:13345028-13348000:-	0.105306	0.016317	ENSG00000086475	SE	22929	SEPHS1	10	13317424	13348298	-1	protein_coding	selenophosphate synthetase 1 [Source:HGNC Symbol;Acc:HGNC:19685]	http://genome-euro.ucsc.edu/cgi-bin/hgTracks?hgS_doOtherUser=submit&hgS_otherUserName=sjcockell&hgS_otherUserSessionName=SuppaResults&position=chr10:13317424-13348298
ENSG00000086827.8;A3:chr11:113736822-113737572:113736773-113737572:-	-0.103864	0.0274725	ENSG00000086827	A3	9183	ZW10	11	113733187	113773811	-1	protein_coding	zw10 kinetochore protein [Source:HGNC Symbol;Acc:HGNC:13194]	http://genome-euro.ucsc.edu/cgi-bin/hgTracks?hgS_doOtherUser=submit&hgS_otherUserName=sjcockell&hgS_otherUserSessionName=SuppaResults&position=chr11:113733187-113773811
ENSG00000087470.17;SE:chr12:32737942-32738264:32738296-32740064:+	0.252433	0.0284715	ENSG00000087470	SE	10059	DNM1L	12	32679200	32745650	1	protein_coding	dynamin 1 like [Source:HGNC Symbol;Acc:HGNC:2973]	http://genome-euro.ucsc.edu/cgi-bin/hgTracks?hgS_doOtherUser=submit&hgS_otherUserName=sjcockell&hgS_otherUserSessionName=SuppaResults&position=chr12:32679200-32745650
ENSG00000089902.9;SE:chr14:102721084-102721320:102721377-102722187:+	0.101987	0.024975	ENSG00000089902	SE	23186	RCOR1	14	102592661	102730576	1	protein_coding	REST corepressor 1 [Source:HGNC Symbol;Acc:HGNC:17441]	http://genome-euro.ucsc.edu/cgi-bin/hgTracks?hgS_doOtherUser=submit&hgS_otherUserName=sjcockell&hgS_otherUserSessionName=SuppaResults&position=chr14:102592661-102730576
ENSG00000090621.13;A3:chr1:39576233-39576552:39576223-39576552:-	0.365622	0.014985	ENSG00000090621	A3	8761	PABPC4	1	39560816	39576790	-1	protein_coding	poly(A) binding protein cytoplasmic 4 [Source:HGNC Symbol;Acc:HGNC:8557]	http://genome-euro.ucsc.edu/cgi-bin/hgTracks?hgS_doOtherUser=submit&hgS_otherUserName=sjcockell&hgS_otherUserSessionName=SuppaResults&position=chr1:39560816-39576790
ENSG00000091409.14;SE:chr2:172498100-172501772:172501901-172504091:+	0.180938	0.035964	ENSG00000091409	SE	3655	ITGA6	2	172427354	172506282	1	protein_coding	integrin subunit alpha 6 [Source:HGNC Symbol;Acc:HGNC:6142]	http://genome-euro.ucsc.edu/cgi-bin/hgTracks?hgS_doOtherUser=submit&hgS_otherUserName=sjcockell&hgS_otherUserSessionName=SuppaResults&position=chr2:172427354-172506282
ENSG00000099875.14;A3:chr19:2039856-2040134:2037829-2040134:-	-0.109508	0.003996	ENSG00000099875	A3	2872	MKNK2	19	2037465	2051244	-1	protein_coding	MAP kinase interacting serine/threonine kinase 2 [Source:HGNC Symbol;Acc:HGNC:7111]	http://genome-euro.ucsc.edu/cgi-bin/hgTracks?hgS_doOtherUser=submit&hgS_otherUserName=sjcockell&hgS_otherUserSessionName=SuppaResults&position=chr19:2037465-2051244
ENSG00000100142.14;AL:chr22:37967170-37967625:37967798:37967170-38025579:38025768:+	-0.119461	0.0427073	ENSG00000100142	AL	5435	POLR2F	22	37952607	38041915	1	protein_coding	RNA polymerase II subunit F [Source:HGNC Symbol;Acc:HGNC:9193]	http://genome-euro.ucsc.edu/cgi-bin/hgTracks?hgS_doOtherUser=submit&hgS_otherUserName=sjcockell&hgS_otherUserSessionName=SuppaResults&position=chr22:37952607-38041915
ENSG00000100142.14;AL:chr22:37967170-37967625:37967801:37967170-38025579:38025768:+	-0.101139	0.0427073	ENSG00000100142	AL	5435	POLR2F	22	37952607	38041915	1	protein_coding	RNA polymerase II subunit F [Source:HGNC Symbol;Acc:HGNC:9193]	http://genome-euro.ucsc.edu/cgi-bin/hgTracks?hgS_doOtherUser=submit&hgS_otherUserName=sjcockell&hgS_otherUserSessionName=SuppaResults&position=chr22:37952607-38041915
ENSG00000100219.16;AF:chr22:28799153-28799960:28800133:28799153-28800298:28800572:-	-0.129984	0.011988	ENSG00000100219	AF	7494	XBP1	22	28794555	28800597	-1	protein_coding	X-box binding protein 1 [Source:HGNC Symbol;Acc:HGNC:12801]	http://genome-euro.ucsc.edu/cgi-bin/hgTracks?hgS_doOtherUser=submit&hgS_otherUserName=sjcockell&hgS_otherUserSessionName=SuppaResults&position=chr22:28794555-28800597
ENSG00000100344.10;AF:chr22:43923739:43924098-43926935:43924114:43924334-43926935:+	0.320075	0.041958	ENSG00000100344	AF	80339	PNPLA3	22	43923739	43964488	1	protein_coding	patatin like phospholipase domain containing 3 [Source:HGNC Symbol;Acc:HGNC:18590]	http://genome-euro.ucsc.edu/cgi-bin/hgTracks?hgS_doOtherUser=submit&hgS_otherUserName=sjcockell&hgS_otherUserSessionName=SuppaResults&position=chr22:43923739-43964488
ENSG00000100568.10;SE:chr14:67651481-67653437:67653498-67656416:-	0.102957	0.017982	ENSG00000100568	SE	10490	VTI1B	14	67647075	67674831	-1	protein_coding	vesicle transport through interaction with t-SNAREs 1B [Source:HGNC Symbol;Acc:HGNC:17793]	http://genome-euro.ucsc.edu/cgi-bin/hgTracks?hgS_doOtherUser=submit&hgS_otherUserName=sjcockell&hgS_otherUserSessionName=SuppaResults&position=chr14:67647075-67674831
ENSG00000100575.13;A3:chr14:58409084-58410843:58409081-58410843:-	-0.130719	0.0431235	ENSG00000100575	A3	26520	TIMM9	14	58408494	58427614	-1	protein_coding	translocase of inner mitochondrial membrane 9 [Source:HGNC Symbol;Acc:HGNC:11819]	http://genome-euro.ucsc.edu/cgi-bin/hgTracks?hgS_doOtherUser=submit&hgS_otherUserName=sjcockell&hgS_otherUserSessionName=SuppaResults&position=chr14:58408494-58427614
ENSG00000100575.13;A3:chr14:58409099-58410843:58409084-58410843:-	0.112996	0.0431235	ENSG00000100575	A3	26520	TIMM9	14	58408494	58427614	-1	protein_coding	translocase of inner mitochondrial membrane 9 [Source:HGNC Symbol;Acc:HGNC:11819]	http://genome-euro.ucsc.edu/cgi-bin/hgTracks?hgS_doOtherUser=submit&hgS_otherUserName=sjcockell&hgS_otherUserSessionName=SuppaResults&position=chr14:58408494-58427614
ENSG00000100575.13;AF:chr14:58410938-58411907:58412113:58410938-58427054:58427171:-	0.247741	0.0431235	ENSG00000100575	AF	26520	TIMM9	14	58408494	58427614	-1	protein_coding	translocase of inner mitochondrial membrane 9 [Source:HGNC Symbol;Acc:HGNC:11819]	http://genome-euro.ucsc.edu/cgi-bin/hgTracks?hgS_doOtherUser=submit&hgS_otherUserName=sjcockell&hgS_otherUserSessionName=SuppaResults&position=chr14:58408494-58427614
ENSG00000100575.13;SE:chr14:58410938-58411907:58411971-58427054:-	0.102301	0.0431235	ENSG00000100575	SE	26520	TIMM9	14	58408494	58427614	-1	protein_coding	translocase of inner mitochondrial membrane 9 [Source:HGNC Symbol;Acc:HGNC:11819]	http://genome-euro.ucsc.edu/cgi-bin/hgTracks?hgS_doOtherUser=submit&hgS_otherUserName=sjcockell&hgS_otherUserSessionName=SuppaResults&position=chr14:58408494-58427614
ENSG00000100575.13;SE:chr14:58410938-58424008:58424095-58427054:-	0.175051	0.0431235	ENSG00000100575	SE	26520	TIMM9	14	58408494	58427614	-1	protein_coding	translocase of inner mitochondrial membrane 9 [Source:HGNC Symbol;Acc:HGNC:11819]	http://genome-euro.ucsc.edu/cgi-bin/hgTracks?hgS_doOtherUser=submit&hgS_otherUserName=sjcockell&hgS_otherUserSessionName=SuppaResults&position=chr14:58408494-58427614
ENSG00000100664.10;AF:chr14:103334192:103334260-103335653:103334387:103334597-103335653:+	-0.273728	0.047952	ENSG00000100664	AF	1983	EIF5	14	103333544	103345025	1	protein_coding	eukaryotic translation initiation factor 5 [Source:HGNC Symbol;Acc:HGNC:3299]	http://genome-euro.ucsc.edu/cgi-bin/hgTracks?hgS_doOtherUser=submit&hgS_otherUserName=sjcockell&hgS_otherUserSessionName=SuppaResults&position=chr14:103333544-103345025
ENSG00000101191.16;A5:chr20:62914406-62926432:62914406-62926439:-	-0.144377	0.03996	ENSG00000101191	A5	11083	DIDO1	20	62877738	62937952	-1	protein_coding	death inducer-obliterator 1 [Source:HGNC Symbol;Acc:HGNC:2680]	http://genome-euro.ucsc.edu/cgi-bin/hgTracks?hgS_doOtherUser=submit&hgS_otherUserName=sjcockell&hgS_otherUserSessionName=SuppaResults&position=chr20:62877738-62937952
ENSG00000101191.16;AF:chr20:62914406-62926432:62926469:62914406-62937796:62937952:-	-0.125529	0.03996	ENSG00000101191	AF	11083	DIDO1	20	62877738	62937952	-1	protein_coding	death inducer-obliterator 1 [Source:HGNC Symbol;Acc:HGNC:2680]	http://genome-euro.ucsc.edu/cgi-bin/hgTracks?hgS_doOtherUser=submit&hgS_otherUserName=sjcockell&hgS_otherUserSessionName=SuppaResults&position=chr20:62877738-62937952
ENSG00000101310.15;A5:chr20:18508030-18510822:18507972-18510822:+	0.137491	0.034965	ENSG00000101310	A5	10483	SEC23B	20	18507493	18561415	1	protein_coding	Sec23 homolog B, coat complex II component [Source:HGNC Symbol;Acc:HGNC:10702]	http://genome-euro.ucsc.edu/cgi-bin/hgTracks?hgS_doOtherUser=submit&hgS_otherUserName=sjcockell&hgS_otherUserSessionName=SuppaResults&position=chr20:18507493-18561415
ENSG00000101310.15;A5:chr20:18508297-18510822:18508030-18510822:+	-0.322545	0.034965	ENSG00000101310	A5	10483	SEC23B	20	18507493	18561415	1	protein_coding	Sec23 homolog B, coat complex II component [Source:HGNC Symbol;Acc:HGNC:10702]	http://genome-euro.ucsc.edu/cgi-bin/hgTracks?hgS_doOtherUser=submit&hgS_otherUserName=sjcockell&hgS_otherUserSessionName=SuppaResults&position=chr20:18507493-18561415
ENSG00000101361.16;AF:chr20:2652646:2652931-2653279:2653001:2653173-2653279:+	0.121442	0.0244755	ENSG00000101361	AF	10528	NOP56	20	2652145	2658393	1	protein_coding	NOP56 ribonucleoprotein [Source:HGNC Symbol;Acc:HGNC:15911]	http://genome-euro.ucsc.edu/cgi-bin/hgTracks?hgS_doOtherUser=submit&hgS_otherUserName=sjcockell&hgS_otherUserSessionName=SuppaResults&position=chr20:2652145-2658393
ENSG00000102054.17;AF:chrX:16869220-16869494:16869886:16869220-16870038:16870414:-	-0.146042	0.01998	ENSG00000102054	AF	5931	RBBP7	X	16839283	16870414	-1	protein_coding	RB binding protein 7, chromatin remodeling factor [Source:HGNC Symbol;Acc:HGNC:9890]	http://genome-euro.ucsc.edu/cgi-bin/hgTracks?hgS_doOtherUser=submit&hgS_otherUserName=sjcockell&hgS_otherUserSessionName=SuppaResults&position=chrX:16839283-16870414
ENSG00000102241.11;A3:chrX:136497439-136497624:136497439-136497676:+	0.164045	0.030969	ENSG00000102241	A3	27336	HTATSF1	X	136497079	136512346	1	protein_coding	HIV-1 Tat specific factor 1 [Source:HGNC Symbol;Acc:HGNC:5276]	http://genome-euro.ucsc.edu/cgi-bin/hgTracks?hgS_doOtherUser=submit&hgS_otherUserName=sjcockell&hgS_otherUserSessionName=SuppaResults&position=chrX:136497079-136512346
ENSG00000103067.13;AF:chr16:68235762-68235848:68236132:68235762-68237935:68238102:-	0.143693	0.03663	ENSG00000103067	AF	80004	ESRP2	16	68229111	68238102	-1	protein_coding	epithelial splicing regulatory protein 2 [Source:HGNC Symbol;Acc:HGNC:26152]	http://genome-euro.ucsc.edu/cgi-bin/hgTracks?hgS_doOtherUser=submit&hgS_otherUserName=sjcockell&hgS_otherUserSessionName=SuppaResults&position=chr16:68229111-68238102
ENSG00000103067.13;AF:chr16:68235762-68235848:68236584:68235762-68237935:68238102:-	0.126776	0.03663	ENSG00000103067	AF	80004	ESRP2	16	68229111	68238102	-1	protein_coding	epithelial splicing regulatory protein 2 [Source:HGNC Symbol;Acc:HGNC:26152]	http://genome-euro.ucsc.edu/cgi-bin/hgTracks?hgS_doOtherUser=submit&hgS_otherUserName=sjcockell&hgS_otherUserSessionName=SuppaResults&position=chr16:68229111-68238102
ENSG00000103067.13;RI:chr16:68232577:68232687-68232761:68232815:-	-0.144796	0.0164835	ENSG00000103067	RI	80004	ESRP2	16	68229111	68238102	-1	protein_coding	epithelial splicing regulatory protein 2 [Source:HGNC Symbol;Acc:HGNC:26152]	http://genome-euro.ucsc.edu/cgi-bin/hgTracks?hgS_doOtherUser=submit&hgS_otherUserName=sjcockell&hgS_otherUserSessionName=SuppaResults&position=chr16:68229111-68238102
ENSG00000103067.13;RI:chr16:68232577:68232717-68232761:68232815:-	-0.258374	0.0164835	ENSG00000103067	RI	80004	ESRP2	16	68229111	68238102	-1	protein_coding	epithelial splicing regulatory protein 2 [Source:HGNC Symbol;Acc:HGNC:26152]	http://genome-euro.ucsc.edu/cgi-bin/hgTracks?hgS_doOtherUser=submit&hgS_otherUserName=sjcockell&hgS_otherUserSessionName=SuppaResults&position=chr16:68229111-68238102
ENSG00000103067.13;SE:chr16:68232288-68232371:68232503-68232577:-	0.146305	0.0164835	ENSG00000103067	SE	80004	ESRP2	16	68229111	68238102	-1	protein_coding	epithelial splicing regulatory protein 2 [Source:HGNC Symbol;Acc:HGNC:26152]	http://genome-euro.ucsc.edu/cgi-bin/hgTracks?hgS_doOtherUser=submit&hgS_otherUserName=sjcockell&hgS_otherUserSessionName=SuppaResults&position=chr16:68229111-68238102
ENSG00000103342.12;AF:chr16:11898035-11914989:11915203:11898035-11915369:11915878:-	-0.124371	0.0406736	ENSG00000103342	AF	2935	GSPT1	16	11868128	11916082	-1	protein_coding	G1 to S phase transition 1 [Source:HGNC Symbol;Acc:HGNC:4621]	http://genome-euro.ucsc.edu/cgi-bin/hgTracks?hgS_doOtherUser=submit&hgS_otherUserName=sjcockell&hgS_otherUserSessionName=SuppaResults&position=chr16:11868128-11916082
ENSG00000103415.11;AF:chr16:4474690:4474847-4505484:4496146:4496266-4505484:+	-0.23434	0.0404595	ENSG00000103415	AF	3163	HMOX2	16	4474690	4510347	1	protein_coding	heme oxygenase 2 [Source:HGNC Symbol;Acc:HGNC:5014]	http://genome-euro.ucsc.edu/cgi-bin/hgTracks?hgS_doOtherUser=submit&hgS_otherUserName=sjcockell&hgS_otherUserSessionName=SuppaResults&position=chr16:4474690-4510347
ENSG00000103415.11;MX:chr16:4476487-4483637:4483738-4505484:4476487-4488644:4488742-4505484:+	0.520465	0.0404595	ENSG00000103415	MX	3163	HMOX2	16	4474690	4510347	1	protein_coding	heme oxygenase 2 [Source:HGNC Symbol;Acc:HGNC:5014]	http://genome-euro.ucsc.edu/cgi-bin/hgTracks?hgS_doOtherUser=submit&hgS_otherUserName=sjcockell&hgS_otherUserSessionName=SuppaResults&position=chr16:4474690-4510347
ENSG00000103876.12;AF:chr15:80152490:80152545-80153026:80152780:80152905-80153026:+	-0.346471	0.040293	ENSG00000103876	AF	2184	FAH	15	80152490	80186946	1	protein_coding	fumarylacetoacetate hydrolase [Source:HGNC Symbol;Acc:HGNC:3579]	http://genome-euro.ucsc.edu/cgi-bin/hgTracks?hgS_doOtherUser=submit&hgS_otherUserName=sjcockell&hgS_otherUserSessionName=SuppaResults&position=chr15:80152490-80186946
ENSG00000103876.12;AF:chr15:80152490:80152545-80153026:80152855:80152905-80153026:+	-0.236396	0.040293	ENSG00000103876	AF	2184	FAH	15	80152490	80186946	1	protein_coding	fumarylacetoacetate hydrolase [Source:HGNC Symbol;Acc:HGNC:3579]	http://genome-euro.ucsc.edu/cgi-bin/hgTracks?hgS_doOtherUser=submit&hgS_otherUserName=sjcockell&hgS_otherUserSessionName=SuppaResults&position=chr15:80152490-80186946
ENSG00000104067.16;SE:chr15:29719138-29719777:29720016-29720358:-	-0.239016	0.00699301	ENSG00000104067	SE	7082	TJP1	15	29699367	29968865	-1	protein_coding	tight junction protein 1 [Source:HGNC Symbol;Acc:HGNC:11827]	http://genome-euro.ucsc.edu/cgi-bin/hgTracks?hgS_doOtherUser=submit&hgS_otherUserName=sjcockell&hgS_otherUserSessionName=SuppaResults&position=chr15:29699367-29968865
ENSG00000104413.16;MX:chr8:94678371-94692677:94692827-94705925:94678371-94696852:94696961-94705925:+	0.240347	0.026973	ENSG00000104413	MX	54845	ESRP1	8	94641074	94707466	1	protein_coding	epithelial splicing regulatory protein 1 [Source:HGNC Symbol;Acc:HGNC:25966]	http://genome-euro.ucsc.edu/cgi-bin/hgTracks?hgS_doOtherUser=submit&hgS_otherUserName=sjcockell&hgS_otherUserSessionName=SuppaResults&position=chr8:94641074-94707466
ENSG00000104413.16;SE:chr8:94678371-94692677:94692827-94696852:+	0.234916	0.026973	ENSG00000104413	SE	54845	ESRP1	8	94641074	94707466	1	protein_coding	epithelial splicing regulatory protein 1 [Source:HGNC Symbol;Acc:HGNC:25966]	http://genome-euro.ucsc.edu/cgi-bin/hgTracks?hgS_doOtherUser=submit&hgS_otherUserName=sjcockell&hgS_otherUserSessionName=SuppaResults&position=chr8:94641074-94707466
ENSG00000104765.15;A5:chr8:26383496-26391243:26383478-26391243:+	-0.465298	0.025974	ENSG00000104765	A5	665	BNIP3L	8	26382898	26505636	1	protein_coding	BCL2 interacting protein 3 like [Source:HGNC Symbol;Acc:HGNC:1085]	http://genome-euro.ucsc.edu/cgi-bin/hgTracks?hgS_doOtherUser=submit&hgS_otherUserName=sjcockell&hgS_otherUserSessionName=SuppaResults&position=chr8:26382898-26505636
ENSG00000104824.16;AF:chr19:38847434-38849308:38849368:38847434-38849700:38850333:-	0.158814	0.00632701	ENSG00000104824	AF	3191	HNRNPL	19	38836388	38852347	-1	protein_coding	heterogeneous nuclear ribonucleoprotein L [Source:HGNC Symbol;Acc:HGNC:5045]	http://genome-euro.ucsc.edu/cgi-bin/hgTracks?hgS_doOtherUser=submit&hgS_otherUserName=sjcockell&hgS_otherUserSessionName=SuppaResults&position=chr19:38836388-38852347
ENSG00000104824.16;AF:chr19:38847434-38849308:38849368:38847434-38849871:38849940:-	0.141659	0.0265734	ENSG00000104824	AF	3191	HNRNPL	19	38836388	38852347	-1	protein_coding	heterogeneous nuclear ribonucleoprotein L [Source:HGNC Symbol;Acc:HGNC:5045]	http://genome-euro.ucsc.edu/cgi-bin/hgTracks?hgS_doOtherUser=submit&hgS_otherUserName=sjcockell&hgS_otherUserSessionName=SuppaResults&position=chr19:38836388-38852347
ENSG00000104824.16;AF:chr19:38847434-38849308:38849368:38847434-38851068:38851155:-	0.209841	0.00632701	ENSG00000104824	AF	3191	HNRNPL	19	38836388	38852347	-1	protein_coding	heterogeneous nuclear ribonucleoprotein L [Source:HGNC Symbol;Acc:HGNC:5045]	http://genome-euro.ucsc.edu/cgi-bin/hgTracks?hgS_doOtherUser=submit&hgS_otherUserName=sjcockell&hgS_otherUserSessionName=SuppaResults&position=chr19:38836388-38852347
ENSG00000104824.16;AF:chr19:38847434-38849308:38849368:38847434-38852296:38852325:-	0.151998	0.00632701	ENSG00000104824	AF	3191	HNRNPL	19	38836388	38852347	-1	protein_coding	heterogeneous nuclear ribonucleoprotein L [Source:HGNC Symbol;Acc:HGNC:5045]	http://genome-euro.ucsc.edu/cgi-bin/hgTracks?hgS_doOtherUser=submit&hgS_otherUserName=sjcockell&hgS_otherUserSessionName=SuppaResults&position=chr19:38836388-38852347
ENSG00000104824.16;AF:chr19:38847434-38849308:38849368:38847434-38852296:38852347:-	0.162662	0.0265734	ENSG00000104824	AF	3191	HNRNPL	19	38836388	38852347	-1	protein_coding	heterogeneous nuclear ribonucleoprotein L [Source:HGNC Symbol;Acc:HGNC:5045]	http://genome-euro.ucsc.edu/cgi-bin/hgTracks?hgS_doOtherUser=submit&hgS_otherUserName=sjcockell&hgS_otherUserSessionName=SuppaResults&position=chr19:38836388-38852347
ENSG00000105486.13;AF:chr19:48165623-48169609:48169689:48165623-48170241:48170329:-	-0.606772	0.0422078	ENSG00000105486	AF	3978	LIG1	19	48115445	48170603	-1	protein_coding	DNA ligase 1 [Source:HGNC Symbol;Acc:HGNC:6598]	http://genome-euro.ucsc.edu/cgi-bin/hgTracks?hgS_doOtherUser=submit&hgS_otherUserName=sjcockell&hgS_otherUserSessionName=SuppaResults&position=chr19:48115445-48170603
ENSG00000105486.13;AF:chr19:48165623-48169609:48169689:48165623-48170241:48170344:-	-0.297239	0.0422078	ENSG00000105486	AF	3978	LIG1	19	48115445	48170603	-1	protein_coding	DNA ligase 1 [Source:HGNC Symbol;Acc:HGNC:6598]	http://genome-euro.ucsc.edu/cgi-bin/hgTracks?hgS_doOtherUser=submit&hgS_otherUserName=sjcockell&hgS_otherUserSessionName=SuppaResults&position=chr19:48115445-48170603
ENSG00000105655.18;RI:chr19:18436330:18436479-18436973:18437105:-	-0.558576	0.031635	ENSG00000105655	RI	51477	ISYNA1	19	18434388	18438301	-1	protein_coding	inositol-3-phosphate synthase 1 [Source:HGNC Symbol;Acc:HGNC:29821]	http://genome-euro.ucsc.edu/cgi-bin/hgTracks?hgS_doOtherUser=submit&hgS_otherUserName=sjcockell&hgS_otherUserSessionName=SuppaResults&position=chr19:18434388-18438301
ENSG00000105655.18;SE:chr19:18436479-18436684:18436877-18436973:-	-0.21572	0.031635	ENSG00000105655	SE	51477	ISYNA1	19	18434388	18438301	-1	protein_coding	inositol-3-phosphate synthase 1 [Source:HGNC Symbol;Acc:HGNC:29821]	http://genome-euro.ucsc.edu/cgi-bin/hgTracks?hgS_doOtherUser=submit&hgS_otherUserName=sjcockell&hgS_otherUserSessionName=SuppaResults&position=chr19:18434388-18438301
ENSG00000105655.18;SE:chr19:18436877-18436973:18437105-18437860:-	0.396291	0.031635	ENSG00000105655	SE	51477	ISYNA1	19	18434388	18438301	-1	protein_coding	inositol-3-phosphate synthase 1 [Source:HGNC Symbol;Acc:HGNC:29821]	http://genome-euro.ucsc.edu/cgi-bin/hgTracks?hgS_doOtherUser=submit&hgS_otherUserName=sjcockell&hgS_otherUserSessionName=SuppaResults&position=chr19:18434388-18438301
ENSG00000105699.16;AF:chr19:35248765:35249131-35250315:35249347:35249368-35250315:+	0.259903	0.00774226	ENSG00000105699	AF	51599	LSR	19	35248330	35267964	1	protein_coding	lipolysis stimulated lipoprotein receptor [Source:HGNC Symbol;Acc:HGNC:29572]	http://genome-euro.ucsc.edu/cgi-bin/hgTracks?hgS_doOtherUser=submit&hgS_otherUserName=sjcockell&hgS_otherUserSessionName=SuppaResults&position=chr19:35248330-35267964
ENSG00000105699.16;SE:chr19:35259064-35262546:35262692-35266359:+	-0.221032	0	ENSG00000105699	SE	51599	LSR	19	35248330	35267964	1	protein_coding	lipolysis stimulated lipoprotein receptor [Source:HGNC Symbol;Acc:HGNC:29572]	http://genome-euro.ucsc.edu/cgi-bin/hgTracks?hgS_doOtherUser=submit&hgS_otherUserName=sjcockell&hgS_otherUserSessionName=SuppaResults&position=chr19:35248330-35267964
ENSG00000106348.16;AF:chr7:128403754-128405767:128405939:128403754-128409756:128409986:-	0.46317	0.0262238	ENSG00000106348	AF	3614	IMPDH1	7	128392277	128410252	-1	protein_coding	inosine monophosphate dehydrogenase 1 [Source:HGNC Symbol;Acc:HGNC:6052]	http://genome-euro.ucsc.edu/cgi-bin/hgTracks?hgS_doOtherUser=submit&hgS_otherUserName=sjcockell&hgS_otherUserSessionName=SuppaResults&position=chr7:128392277-128410252
ENSG00000106348.16;AF:chr7:128403754-128405767:128405948:128403754-128409756:128409986:-	0.164363	0.0262238	ENSG00000106348	AF	3614	IMPDH1	7	128392277	128410252	-1	protein_coding	inosine monophosphate dehydrogenase 1 [Source:HGNC Symbol;Acc:HGNC:6052]	http://genome-euro.ucsc.edu/cgi-bin/hgTracks?hgS_doOtherUser=submit&hgS_otherUserName=sjcockell&hgS_otherUserSessionName=SuppaResults&position=chr7:128392277-128410252
ENSG00000106479.10;A5:chr7:149838635-149844625:149838461-149844625:+	0.127874	0.0294705	ENSG00000106479	A5	643641	ZNF862	7	149838367	149867479	1	protein_coding	zinc finger protein 862 [Source:HGNC Symbol;Acc:HGNC:34519]	http://genome-euro.ucsc.edu/cgi-bin/hgTracks?hgS_doOtherUser=submit&hgS_otherUserName=sjcockell&hgS_otherUserSessionName=SuppaResults&position=chr7:149838367-149867479
ENSG00000106541.11;A5:chr7:16792957-16794851:16792957-16794936:-	0.157559	0.026973	ENSG00000106541	A5	10551	AGR2	7	16791811	16833433	-1	protein_coding	anterior gradient 2, protein disulphide isomerase family member [Source:HGNC Symbol;Acc:HGNC:328]	http://genome-euro.ucsc.edu/cgi-bin/hgTracks?hgS_doOtherUser=submit&hgS_otherUserName=sjcockell&hgS_otherUserSessionName=SuppaResults&position=chr7:16791811-16833433
ENSG00000106609.16;SE:chr7:66948694-66950952:66951135-66953226:+	-0.114727	0.043956	ENSG00000106609	SE	55069	TMEM248	7	66921225	66958551	1	protein_coding	transmembrane protein 248 [Source:HGNC Symbol;Acc:HGNC:25476]	http://genome-euro.ucsc.edu/cgi-bin/hgTracks?hgS_doOtherUser=submit&hgS_otherUserName=sjcockell&hgS_otherUserSessionName=SuppaResults&position=chr7:66921225-66958551
ENSG00000107140.15;SE:chr9:35606983-35607327:35607409-35607582:+	0.130375	0.01998	ENSG00000107140	SE	7016	TESK1	9	35605305	35610041	1	protein_coding	testis-specific kinase 1 [Source:HGNC Symbol;Acc:HGNC:11731]	http://genome-euro.ucsc.edu/cgi-bin/hgTracks?hgS_doOtherUser=submit&hgS_otherUserName=sjcockell&hgS_otherUserSessionName=SuppaResults&position=chr9:35605305-35610041
ENSG00000107560.10;SE:chr10:118015110-118033982:118034041-118038972:-	-0.108856	0.0464535	ENSG00000107560	SE	22841	RAB11FIP2	10	118004916	118046603	-1	protein_coding	RAB11 family interacting protein 2 [Source:HGNC Symbol;Acc:HGNC:29152]	http://genome-euro.ucsc.edu/cgi-bin/hgTracks?hgS_doOtherUser=submit&hgS_otherUserName=sjcockell&hgS_otherUserSessionName=SuppaResults&position=chr10:118004916-118046603
ENSG00000107779.13;A3:chr10:86924641-86929297:86924641-86929300:+	-0.377032	0.00599401	ENSG00000107779	A3	657	BMPR1A	10	86756601	86932838	1	protein_coding	bone morphogenetic protein receptor type 1A [Source:HGNC Symbol;Acc:HGNC:1076]	http://genome-euro.ucsc.edu/cgi-bin/hgTracks?hgS_doOtherUser=submit&hgS_otherUserName=sjcockell&hgS_otherUserSessionName=SuppaResults&position=chr10:86756601-86932838
ENSG00000108506.12;AF:chr17:61926662-61927100:61927105:61926662-61927654:61927991:-	-0.323338	0.01665	ENSG00000108506	AF	57508	INTS2	17	61865367	61928016	-1	protein_coding	integrator complex subunit 2 [Source:HGNC Symbol;Acc:HGNC:29241]	http://genome-euro.ucsc.edu/cgi-bin/hgTracks?hgS_doOtherUser=submit&hgS_otherUserName=sjcockell&hgS_otherUserSessionName=SuppaResults&position=chr17:61865367-61928016
ENSG00000108506.12;AF:chr17:61926662-61927100:61927105:61926662-61927922:61927982:-	-0.391749	0.01665	ENSG00000108506	AF	57508	INTS2	17	61865367	61928016	-1	protein_coding	integrator complex subunit 2 [Source:HGNC Symbol;Acc:HGNC:29241]	http://genome-euro.ucsc.edu/cgi-bin/hgTracks?hgS_doOtherUser=submit&hgS_otherUserName=sjcockell&hgS_otherUserSessionName=SuppaResults&position=chr17:61865367-61928016
ENSG00000108506.12;AF:chr17:61926662-61927100:61927105:61926662-61927935:61928016:-	-0.390508	0.01665	ENSG00000108506	AF	57508	INTS2	17	61865367	61928016	-1	protein_coding	integrator complex subunit 2 [Source:HGNC Symbol;Acc:HGNC:29241]	http://genome-euro.ucsc.edu/cgi-bin/hgTracks?hgS_doOtherUser=submit&hgS_otherUserName=sjcockell&hgS_otherUserSessionName=SuppaResults&position=chr17:61865367-61928016
ENSG00000108654.14;A5:chr17:64504842-64506076:64504842-64506514:-	-0.187025	0.0264735	ENSG00000108654	A5	1655	DDX5	17	64499616	64508199	-1	protein_coding	DEAD-box helicase 5 [Source:HGNC Symbol;Acc:HGNC:2746]	http://genome-euro.ucsc.edu/cgi-bin/hgTracks?hgS_doOtherUser=submit&hgS_otherUserName=sjcockell&hgS_otherUserSessionName=SuppaResults&position=chr17:64499616-64508199
ENSG00000108654.14;AF:chr17:64504842-64506076:64506287:64504842-64506514:64506626:-	-0.150409	0.0264735	ENSG00000108654	AF	1655	DDX5	17	64499616	64508199	-1	protein_coding	DEAD-box helicase 5 [Source:HGNC Symbol;Acc:HGNC:2746]	http://genome-euro.ucsc.edu/cgi-bin/hgTracks?hgS_doOtherUser=submit&hgS_otherUserName=sjcockell&hgS_otherUserSessionName=SuppaResults&position=chr17:64499616-64508199
ENSG00000108654.14;AF:chr17:64504842-64506076:64506289:64504842-64506514:64506626:-	-0.12323	0.035298	ENSG00000108654	AF	1655	DDX5	17	64499616	64508199	-1	protein_coding	DEAD-box helicase 5 [Source:HGNC Symbol;Acc:HGNC:2746]	http://genome-euro.ucsc.edu/cgi-bin/hgTracks?hgS_doOtherUser=submit&hgS_otherUserName=sjcockell&hgS_otherUserSessionName=SuppaResults&position=chr17:64499616-64508199
ENSG00000109971.13;AF:chr11:123061329-123061452:123061483:123061329-123062064:123062335:-	0.398436	0.018648	ENSG00000109971	AF	3312	HSPA8	11	123057489	123063230	-1	protein_coding	heat shock protein family A (Hsp70) member 8 [Source:HGNC Symbol;Acc:HGNC:5241]	http://genome-euro.ucsc.edu/cgi-bin/hgTracks?hgS_doOtherUser=submit&hgS_otherUserName=sjcockell&hgS_otherUserSessionName=SuppaResults&position=chr11:123057489-123063230
ENSG00000109971.13;AF:chr11:123061329-123061588:123061833:123061329-123062064:123062335:-	0.241892	0.027972	ENSG00000109971	AF	3312	HSPA8	11	123057489	123063230	-1	protein_coding	heat shock protein family A (Hsp70) member 8 [Source:HGNC Symbol;Acc:HGNC:5241]	http://genome-euro.ucsc.edu/cgi-bin/hgTracks?hgS_doOtherUser=submit&hgS_otherUserName=sjcockell&hgS_otherUserSessionName=SuppaResults&position=chr11:123057489-123063230
ENSG00000109971.13;AF:chr11:123061329-123062064:123062335:123061329-123062347:123062669:-	-0.311533	0.013986	ENSG00000109971	AF	3312	HSPA8	11	123057489	123063230	-1	protein_coding	heat shock protein family A (Hsp70) member 8 [Source:HGNC Symbol;Acc:HGNC:5241]	http://genome-euro.ucsc.edu/cgi-bin/hgTracks?hgS_doOtherUser=submit&hgS_otherUserName=sjcockell&hgS_otherUserSessionName=SuppaResults&position=chr11:123057489-123063230
ENSG00000109971.13;AF:chr11:123061329-123062064:123062335:123061329-123062750:123063230:-	-0.383291	0	ENSG00000109971	AF	3312	HSPA8	11	123057489	123063230	-1	protein_coding	heat shock protein family A (Hsp70) member 8 [Source:HGNC Symbol;Acc:HGNC:5241]	http://genome-euro.ucsc.edu/cgi-bin/hgTracks?hgS_doOtherUser=submit&hgS_otherUserName=sjcockell&hgS_otherUserSessionName=SuppaResults&position=chr11:123057489-123063230
ENSG00000110651.11;AF:chr11:2376177:2376357-2390412:2382460:2382550-2390412:+	0.194601	0.0154845	ENSG00000110651	AF	975	CD81	11	2376177	2397419	1	protein_coding	CD81 molecule [Source:HGNC Symbol;Acc:HGNC:1701]	http://genome-euro.ucsc.edu/cgi-bin/hgTracks?hgS_doOtherUser=submit&hgS_otherUserName=sjcockell&hgS_otherUserSessionName=SuppaResults&position=chr11:2376177-2397419
ENSG00000110651.11;AF:chr11:2382460:2382550-2390412:2390095:2390183-2390412:+	-0.149321	0.0154845	ENSG00000110651	AF	975	CD81	11	2376177	2397419	1	protein_coding	CD81 molecule [Source:HGNC Symbol;Acc:HGNC:1701]	http://genome-euro.ucsc.edu/cgi-bin/hgTracks?hgS_doOtherUser=submit&hgS_otherUserName=sjcockell&hgS_otherUserSessionName=SuppaResults&position=chr11:2376177-2397419
ENSG00000111206.12;A3:chr12:2864755-2866393:2864752-2866393:-	-0.131802	0.035964	ENSG00000111206	A3	2305	FOXM1	12	2857681	2877155	-1	protein_coding	forkhead box M1 [Source:HGNC Symbol;Acc:HGNC:3818]	http://genome-euro.ucsc.edu/cgi-bin/hgTracks?hgS_doOtherUser=submit&hgS_otherUserName=sjcockell&hgS_otherUserSessionName=SuppaResults&position=chr12:2857681-2877155
ENSG00000111639.7;A5:chr12:6492972-6493459:6492972-6493674:-	0.114853	0.017982	ENSG00000111639	A5	51258	MRPL51	12	6491886	6493841	-1	protein_coding	mitochondrial ribosomal protein L51 [Source:HGNC Symbol;Acc:HGNC:14044]	http://genome-euro.ucsc.edu/cgi-bin/hgTracks?hgS_doOtherUser=submit&hgS_otherUserName=sjcockell&hgS_otherUserSessionName=SuppaResults&position=chr12:6491886-6493841
ENSG00000111639.7;A5:chr12:6492972-6493674:6492972-6493717:-	-0.137998	0.017982	ENSG00000111639	A5	51258	MRPL51	12	6491886	6493841	-1	protein_coding	mitochondrial ribosomal protein L51 [Source:HGNC Symbol;Acc:HGNC:14044]	http://genome-euro.ucsc.edu/cgi-bin/hgTracks?hgS_doOtherUser=submit&hgS_otherUserName=sjcockell&hgS_otherUserSessionName=SuppaResults&position=chr12:6491886-6493841
ENSG00000113648.16;SE:chr5:135346057-135350823:135350913-135360497:-	-0.204665	0	ENSG00000113648	SE	9555	H2AFY	5	135333900	135399914	-1	protein_coding	H2A histone family member Y [Source:HGNC Symbol;Acc:HGNC:4740]	http://genome-euro.ucsc.edu/cgi-bin/hgTracks?hgS_doOtherUser=submit&hgS_otherUserName=sjcockell&hgS_otherUserSessionName=SuppaResults&position=chr5:135333900-135399914
ENSG00000113732.8;AL:chr5:172994822-173020238:173020557:172994822-173034399:173034884:+	0.141175	0.00799201	ENSG00000113732	AL	8992	ATP6V0E1	5	172983757	173035445	1	protein_coding	ATPase H+ transporting V0 subunit e1 [Source:HGNC Symbol;Acc:HGNC:863]	http://genome-euro.ucsc.edu/cgi-bin/hgTracks?hgS_doOtherUser=submit&hgS_otherUserName=sjcockell&hgS_otherUserSessionName=SuppaResults&position=chr5:172983757-173035445
ENSG00000114850.6;AF:chr3:156553781-156553993:156554125:156553781-156554737:156554845:-	-0.164915	0.017316	ENSG00000114850	AF	6747	SSR3	3	156540140	156555184	-1	protein_coding	signal sequence receptor subunit 3 [Source:HGNC Symbol;Acc:HGNC:11325]	http://genome-euro.ucsc.edu/cgi-bin/hgTracks?hgS_doOtherUser=submit&hgS_otherUserName=sjcockell&hgS_otherUserSessionName=SuppaResults&position=chr3:156540140-156555184
ENSG00000114850.6;AF:chr3:156553781-156553993:156554125:156553781-156554957:156555117:-	-0.197141	0.017316	ENSG00000114850	AF	6747	SSR3	3	156540140	156555184	-1	protein_coding	signal sequence receptor subunit 3 [Source:HGNC Symbol;Acc:HGNC:11325]	http://genome-euro.ucsc.edu/cgi-bin/hgTracks?hgS_doOtherUser=submit&hgS_otherUserName=sjcockell&hgS_otherUserSessionName=SuppaResults&position=chr3:156540140-156555184
ENSG00000114850.6;AF:chr3:156553781-156553993:156554125:156553781-156554957:156555125:-	-0.136349	0.017316	ENSG00000114850	AF	6747	SSR3	3	156540140	156555184	-1	protein_coding	signal sequence receptor subunit 3 [Source:HGNC Symbol;Acc:HGNC:11325]	http://genome-euro.ucsc.edu/cgi-bin/hgTracks?hgS_doOtherUser=submit&hgS_otherUserName=sjcockell&hgS_otherUserSessionName=SuppaResults&position=chr3:156540140-156555184
ENSG00000115109.13;AF:chr2:120013005:120013210-120019077:120013211:120013681-120019077:+	-0.247737	0.0134865	ENSG00000115109	AF	57669	EPB41L5	2	120013005	120179119	1	protein_coding	erythrocyte membrane protein band 4.1 like 5 [Source:HGNC Symbol;Acc:HGNC:19819]	http://genome-euro.ucsc.edu/cgi-bin/hgTracks?hgS_doOtherUser=submit&hgS_otherUserName=sjcockell&hgS_otherUserSessionName=SuppaResults&position=chr2:120013005-120179119
ENSG00000115648.13;MX:chr2:237525805-237527377:237527516-237540348:237525805-237534564:237534647-237540348:+	0.137094	0.027972	ENSG00000115648	MX	79083	MLPH	2	237485428	237555318	1	protein_coding	melanophilin [Source:HGNC Symbol;Acc:HGNC:29643]	http://genome-euro.ucsc.edu/cgi-bin/hgTracks?hgS_doOtherUser=submit&hgS_otherUserName=sjcockell&hgS_otherUserSessionName=SuppaResults&position=chr2:237485428-237555318
ENSG00000115648.13;SE:chr2:237527516-237534564:237534647-237540348:+	-0.119767	0.015984	ENSG00000115648	SE	79083	MLPH	2	237485428	237555318	1	protein_coding	melanophilin [Source:HGNC Symbol;Acc:HGNC:29643]	http://genome-euro.ucsc.edu/cgi-bin/hgTracks?hgS_doOtherUser=submit&hgS_otherUserName=sjcockell&hgS_otherUserSessionName=SuppaResults&position=chr2:237485428-237555318
ENSG00000115694.14;AF:chr2:241508135-241508318:241508362:241508135-241508505:241508584:-	0.324201	0.046953	ENSG00000115694	AF	10494	STK25	2	241492674	241509730	-1	protein_coding	serine/threonine kinase 25 [Source:HGNC Symbol;Acc:HGNC:11404]	http://genome-euro.ucsc.edu/cgi-bin/hgTracks?hgS_doOtherUser=submit&hgS_otherUserName=sjcockell&hgS_otherUserSessionName=SuppaResults&position=chr2:241492674-241509730
ENSG00000116191.17;SE:chr1:178889696-178892230:178892307-178893919:+	0.133927	0.040959	ENSG00000116191	SE	55103	RALGPS2	1	178725147	178921841	1	protein_coding	Ral GEF with PH domain and SH3 binding motif 2 [Source:HGNC Symbol;Acc:HGNC:30279]	http://genome-euro.ucsc.edu/cgi-bin/hgTracks?hgS_doOtherUser=submit&hgS_otherUserName=sjcockell&hgS_otherUserSessionName=SuppaResults&position=chr1:178725147-178921841
ENSG00000116641.17;SE:chr1:62543745-62544947:62545039-62552732:-	-0.186043	0.032967	ENSG00000116641	SE	85440	DOCK7	1	62454298	62688368	-1	protein_coding	dedicator of cytokinesis 7 [Source:HGNC Symbol;Acc:HGNC:19190]	http://genome-euro.ucsc.edu/cgi-bin/hgTracks?hgS_doOtherUser=submit&hgS_otherUserName=sjcockell&hgS_otherUserSessionName=SuppaResults&position=chr1:62454298-62688368
ENSG00000117143.13;SE:chr1:162590511-162592732:162592782-162597792:+	0.308082	0	ENSG00000117143	SE	6675	UAP1	1	162561506	162599842	1	protein_coding	UDP-N-acetylglucosamine pyrophosphorylase 1 [Source:HGNC Symbol;Acc:HGNC:12457]	http://genome-euro.ucsc.edu/cgi-bin/hgTracks?hgS_doOtherUser=submit&hgS_otherUserName=sjcockell&hgS_otherUserSessionName=SuppaResults&position=chr1:162561506-162599842
ENSG00000117143.13;SE:chr1:162590511-162592735:162592782-162597792:+	0.280838	0	ENSG00000117143	SE	6675	UAP1	1	162561506	162599842	1	protein_coding	UDP-N-acetylglucosamine pyrophosphorylase 1 [Source:HGNC Symbol;Acc:HGNC:12457]	http://genome-euro.ucsc.edu/cgi-bin/hgTracks?hgS_doOtherUser=submit&hgS_otherUserName=sjcockell&hgS_otherUserSessionName=SuppaResults&position=chr1:162561506-162599842
ENSG00000117461.14;A5:chr1:46131956-46132699:46131956-46132784:-	0.178535	0.0274725	ENSG00000117461	A5	8503	PIK3R3	1	46040140	46133036	-1	protein_coding	phosphoinositide-3-kinase regulatory subunit 3 [Source:HGNC Symbol;Acc:HGNC:8981]	http://genome-euro.ucsc.edu/cgi-bin/hgTracks?hgS_doOtherUser=submit&hgS_otherUserName=sjcockell&hgS_otherUserSessionName=SuppaResults&position=chr1:46040140-46133036
ENSG00000118689.14;AF:chr6:108560866:108561829-108663455:108656346:108656538-108663455:+	0.167667	0.0364635	ENSG00000118689	AF	2309	FOXO3	6	108559835	108684774	1	protein_coding	forkhead box O3 [Source:HGNC Symbol;Acc:HGNC:3821]	http://genome-euro.ucsc.edu/cgi-bin/hgTracks?hgS_doOtherUser=submit&hgS_otherUserName=sjcockell&hgS_otherUserSessionName=SuppaResults&position=chr6:108559835-108684774
ENSG00000119523.9;SE:chr9:99218836-99220979:99221137-99221547:-	0.135547	0.021978	ENSG00000119523	SE	85365	ALG2	9	99216426	99221956	-1	protein_coding	ALG2, alpha-1,3/1,6-mannosyltransferase [Source:HGNC Symbol;Acc:HGNC:23159]	http://genome-euro.ucsc.edu/cgi-bin/hgTracks?hgS_doOtherUser=submit&hgS_otherUserName=sjcockell&hgS_otherUserSessionName=SuppaResults&position=chr9:99216426-99221956
ENSG00000120137.6;SE:chr5:168561516-168563889:168564065-168566013:-	0.119452	0.00749251	ENSG00000120137	SE	79646	PANK3	5	168548495	168579600	-1	protein_coding	pantothenate kinase 3 [Source:HGNC Symbol;Acc:HGNC:19365]	http://genome-euro.ucsc.edu/cgi-bin/hgTracks?hgS_doOtherUser=submit&hgS_otherUserName=sjcockell&hgS_otherUserSessionName=SuppaResults&position=chr5:168548495-168579600
ENSG00000120137.6;SE:chr5:168568998-168578634:168578707-168579256:-	-0.127853	0.00749251	ENSG00000120137	SE	79646	PANK3	5	168548495	168579600	-1	protein_coding	pantothenate kinase 3 [Source:HGNC Symbol;Acc:HGNC:19365]	http://genome-euro.ucsc.edu/cgi-bin/hgTracks?hgS_doOtherUser=submit&hgS_otherUserName=sjcockell&hgS_otherUserSessionName=SuppaResults&position=chr5:168548495-168579600
ENSG00000120925.15;AF:chr8:42887871-42896484:42896588:42887871-42897240:42897290:-	0.365229	0.02997	ENSG00000120925	AF	81790	RNF170	8	42849637	42897290	-1	protein_coding	ring finger protein 170 [Source:HGNC Symbol;Acc:HGNC:25358]	http://genome-euro.ucsc.edu/cgi-bin/hgTracks?hgS_doOtherUser=submit&hgS_otherUserName=sjcockell&hgS_otherUserSessionName=SuppaResults&position=chr8:42849637-42897290
ENSG00000120925.15;AF:chr8:42887871-42896484:42896706:42887871-42897240:42897290:-	0.34527	0.038961	ENSG00000120925	AF	81790	RNF170	8	42849637	42897290	-1	protein_coding	ring finger protein 170 [Source:HGNC Symbol;Acc:HGNC:25358]	http://genome-euro.ucsc.edu/cgi-bin/hgTracks?hgS_doOtherUser=submit&hgS_otherUserName=sjcockell&hgS_otherUserSessionName=SuppaResults&position=chr8:42849637-42897290
ENSG00000120925.15;AF:chr8:42887871-42896484:42896721:42887871-42897240:42897290:-	0.359871	0.038961	ENSG00000120925	AF	81790	RNF170	8	42849637	42897290	-1	protein_coding	ring finger protein 170 [Source:HGNC Symbol;Acc:HGNC:25358]	http://genome-euro.ucsc.edu/cgi-bin/hgTracks?hgS_doOtherUser=submit&hgS_otherUserName=sjcockell&hgS_otherUserSessionName=SuppaResults&position=chr8:42849637-42897290
ENSG00000120925.15;AF:chr8:42887871-42896484:42896723:42887871-42897240:42897290:-	0.455848	0.02997	ENSG00000120925	AF	81790	RNF170	8	42849637	42897290	-1	protein_coding	ring finger protein 170 [Source:HGNC Symbol;Acc:HGNC:25358]	http://genome-euro.ucsc.edu/cgi-bin/hgTracks?hgS_doOtherUser=submit&hgS_otherUserName=sjcockell&hgS_otherUserSessionName=SuppaResults&position=chr8:42849637-42897290
ENSG00000122643.19;AF:chr7:33035988-33040872:33040900:33035988-33062568:33062796:-	-0.359519	0.02997	ENSG00000122643	AF	51251	NT5C3A	7	33014114	33062797	-1	protein_coding	5'-nucleotidase, cytosolic IIIA [Source:HGNC Symbol;Acc:HGNC:17820]	http://genome-euro.ucsc.edu/cgi-bin/hgTracks?hgS_doOtherUser=submit&hgS_otherUserName=sjcockell&hgS_otherUserSessionName=SuppaResults&position=chr7:33014114-33062797
ENSG00000122705.16;SE:chr9:36191273-36197551:36197588-36204068:+	-0.388076	0.0274725	ENSG00000122705	SE	1211	CLTA	9	36190856	36304781	1	protein_coding	clathrin light chain A [Source:HGNC Symbol;Acc:HGNC:2090]	http://genome-euro.ucsc.edu/cgi-bin/hgTracks?hgS_doOtherUser=submit&hgS_otherUserName=sjcockell&hgS_otherUserSessionName=SuppaResults&position=chr9:36190856-36304781
ENSG00000122729.18;A5:chr9:32386442-32405485:32386438-32405485:+	-0.190055	0	ENSG00000122729	A5	48	ACO1	9	32384603	32454769	1	protein_coding	aconitase 1 [Source:HGNC Symbol;Acc:HGNC:117]	http://genome-euro.ucsc.edu/cgi-bin/hgTracks?hgS_doOtherUser=submit&hgS_otherUserName=sjcockell&hgS_otherUserSessionName=SuppaResults&position=chr9:32384603-32454769
ENSG00000122783.16;AL:chr7:135165785:135166871-135167732:135167363:135167408-135167732:-	0.175466	0	ENSG00000122783	AL	78996	C7orf49	7	135092363	135170795	-1	protein_coding	chromosome 7 open reading frame 49 [Source:HGNC Symbol;Acc:HGNC:22432]	http://genome-euro.ucsc.edu/cgi-bin/hgTracks?hgS_doOtherUser=submit&hgS_otherUserName=sjcockell&hgS_otherUserSessionName=SuppaResults&position=chr7:135092363-135170795
ENSG00000124795.14;AF:chr6:18258405-18263843:18264208:18258405-18264385:18264541:-	0.144774	0.0124875	ENSG00000124795	AF	7913	DEK	6	18223868	18264823	-1	protein_coding	DEK proto-oncogene [Source:HGNC Symbol;Acc:HGNC:2768]	http://genome-euro.ucsc.edu/cgi-bin/hgTracks?hgS_doOtherUser=submit&hgS_otherUserName=sjcockell&hgS_otherUserSessionName=SuppaResults&position=chr6:18223868-18264823
ENSG00000124795.14;MX:chr6:18258062-18258304:18258405-18264385:18258062-18263843:18263996-18264385:-	-0.183344	0.0124875	ENSG00000124795	MX	7913	DEK	6	18223868	18264823	-1	protein_coding	DEK proto-oncogene [Source:HGNC Symbol;Acc:HGNC:2768]	http://genome-euro.ucsc.edu/cgi-bin/hgTracks?hgS_doOtherUser=submit&hgS_otherUserName=sjcockell&hgS_otherUserSessionName=SuppaResults&position=chr6:18223868-18264823
ENSG00000126457.21;AF:chr19:49676226:49676260-49680487:49678225:49678272-49680487:+	0.147932	0.0494505	ENSG00000126457	AF	3276	PRMT1	19	49675786	49689029	1	protein_coding	protein arginine methyltransferase 1 [Source:HGNC Symbol;Acc:HGNC:5187]	http://genome-euro.ucsc.edu/cgi-bin/hgTracks?hgS_doOtherUser=submit&hgS_otherUserName=sjcockell&hgS_otherUserSessionName=SuppaResults&position=chr19:49675786-49689029
ENSG00000126903.15;RI:chrX:154487306:154488496-154488584:154489082:-	-0.260694	0.010989	ENSG00000126903	RI	8273	SLC10A3	X	154487306	154490690	-1	protein_coding	solute carrier family 10 member 3 [Source:HGNC Symbol;Acc:HGNC:22979]	http://genome-euro.ucsc.edu/cgi-bin/hgTracks?hgS_doOtherUser=submit&hgS_otherUserName=sjcockell&hgS_otherUserSessionName=SuppaResults&position=chrX:154487306-154490690
ENSG00000127314.17;SE:chr12:68611043-68648699:68648781-68650400:+	0.291924	0.032967	ENSG00000127314	SE	5908	RAP1B	12	68610839	68671901	1	protein_coding	RAP1B, member of RAS oncogene family [Source:HGNC Symbol;Acc:HGNC:9857]	http://genome-euro.ucsc.edu/cgi-bin/hgTracks?hgS_doOtherUser=submit&hgS_otherUserName=sjcockell&hgS_otherUserSessionName=SuppaResults&position=chr12:68610839-68671901
ENSG00000127314.17;SE:chr12:68611043-68648706:68648781-68650400:+	0.360263	0.0412088	ENSG00000127314	SE	5908	RAP1B	12	68610839	68671901	1	protein_coding	RAP1B, member of RAS oncogene family [Source:HGNC Symbol;Acc:HGNC:9857]	http://genome-euro.ucsc.edu/cgi-bin/hgTracks?hgS_doOtherUser=submit&hgS_otherUserName=sjcockell&hgS_otherUserSessionName=SuppaResults&position=chr12:68610839-68671901
ENSG00000127837.9;AF:chr2:218269534-218269659:218269710:218269534-218269966:218270145:-	0.198416	0.0314685	ENSG00000127837	AF	14	AAMP	2	218264123	218270257	-1	protein_coding	angio associated migratory cell protein [Source:HGNC Symbol;Acc:HGNC:18]	http://genome-euro.ucsc.edu/cgi-bin/hgTracks?hgS_doOtherUser=submit&hgS_otherUserName=sjcockell&hgS_otherUserSessionName=SuppaResults&position=chr2:218264123-218270257
ENSG00000128886.11;AF:chr15:43776151-43776398:43776440:43776151-43776509:43776572:-	0.353771	0.0174825	ENSG00000128886	AF	80237	ELL3	15	43772600	43777543	-1	protein_coding	elongation factor for RNA polymerase II 3 [Source:HGNC Symbol;Acc:HGNC:23113]	http://genome-euro.ucsc.edu/cgi-bin/hgTracks?hgS_doOtherUser=submit&hgS_otherUserName=sjcockell&hgS_otherUserSessionName=SuppaResults&position=chr15:43772600-43777543
ENSG00000128989.10;A3:chr15:52568902-52569116:52568900-52569116:-	0.157053	0.0132867	ENSG00000128989	A3	10776	ARPP19	15	52547045	52569883	-1	protein_coding	cAMP regulated phosphoprotein 19 [Source:HGNC Symbol;Acc:HGNC:16967]	http://genome-euro.ucsc.edu/cgi-bin/hgTracks?hgS_doOtherUser=submit&hgS_otherUserName=sjcockell&hgS_otherUserSessionName=SuppaResults&position=chr15:52547045-52569883
ENSG00000128989.10;A5:chr15:52557222-52568848:52557222-52569112:-	0.124127	0.0118631	ENSG00000128989	A5	10776	ARPP19	15	52547045	52569883	-1	protein_coding	cAMP regulated phosphoprotein 19 [Source:HGNC Symbol;Acc:HGNC:16967]	http://genome-euro.ucsc.edu/cgi-bin/hgTracks?hgS_doOtherUser=submit&hgS_otherUserName=sjcockell&hgS_otherUserSessionName=SuppaResults&position=chr15:52547045-52569883
ENSG00000128989.10;A5:chr15:52557222-52568848:52557222-52569116:-	0.214963	0.00949051	ENSG00000128989	A5	10776	ARPP19	15	52547045	52569883	-1	protein_coding	cAMP regulated phosphoprotein 19 [Source:HGNC Symbol;Acc:HGNC:16967]	http://genome-euro.ucsc.edu/cgi-bin/hgTracks?hgS_doOtherUser=submit&hgS_otherUserName=sjcockell&hgS_otherUserSessionName=SuppaResults&position=chr15:52547045-52569883
ENSG00000128989.10;A5:chr15:52557222-52569112:52557222-52569116:-	0.154516	0.0118631	ENSG00000128989	A5	10776	ARPP19	15	52547045	52569883	-1	protein_coding	cAMP regulated phosphoprotein 19 [Source:HGNC Symbol;Acc:HGNC:16967]	http://genome-euro.ucsc.edu/cgi-bin/hgTracks?hgS_doOtherUser=submit&hgS_otherUserName=sjcockell&hgS_otherUserSessionName=SuppaResults&position=chr15:52547045-52569883
ENSG00000128989.10;SE:chr15:52557222-52564190:52564246-52569116:-	0.176788	0.0284715	ENSG00000128989	SE	10776	ARPP19	15	52547045	52569883	-1	protein_coding	cAMP regulated phosphoprotein 19 [Source:HGNC Symbol;Acc:HGNC:16967]	http://genome-euro.ucsc.edu/cgi-bin/hgTracks?hgS_doOtherUser=submit&hgS_otherUserName=sjcockell&hgS_otherUserSessionName=SuppaResults&position=chr15:52547045-52569883
ENSG00000128989.10;SE:chr15:52557222-52568848:52568902-52569116:-	0.231571	0.00949051	ENSG00000128989	SE	10776	ARPP19	15	52547045	52569883	-1	protein_coding	cAMP regulated phosphoprotein 19 [Source:HGNC Symbol;Acc:HGNC:16967]	http://genome-euro.ucsc.edu/cgi-bin/hgTracks?hgS_doOtherUser=submit&hgS_otherUserName=sjcockell&hgS_otherUserSessionName=SuppaResults&position=chr15:52547045-52569883
ENSG00000129625.12;AF:chr5:112921256-112921720:112921997:112921256-112922073:112922230:-	-0.131046	0.04662	ENSG00000129625	AF	7905	REEP5	5	112876379	112922539	-1	protein_coding	receptor accessory protein 5 [Source:HGNC Symbol;Acc:HGNC:30077]	http://genome-euro.ucsc.edu/cgi-bin/hgTracks?hgS_doOtherUser=submit&hgS_otherUserName=sjcockell&hgS_otherUserSessionName=SuppaResults&position=chr5:112876379-112922539
ENSG00000129625.12;AL:chr5:112878085:112878835-112902380:112887015:112887183-112902380:-	-0.484625	0.031968	ENSG00000129625	AL	7905	REEP5	5	112876379	112922539	-1	protein_coding	receptor accessory protein 5 [Source:HGNC Symbol;Acc:HGNC:30077]	http://genome-euro.ucsc.edu/cgi-bin/hgTracks?hgS_doOtherUser=submit&hgS_otherUserName=sjcockell&hgS_otherUserSessionName=SuppaResults&position=chr5:112876379-112922539
ENSG00000129625.12;SE:chr5:112887183-112892450:112892817-112902380:-	0.102648	0.00799201	ENSG00000129625	SE	7905	REEP5	5	112876379	112922539	-1	protein_coding	receptor accessory protein 5 [Source:HGNC Symbol;Acc:HGNC:30077]	http://genome-euro.ucsc.edu/cgi-bin/hgTracks?hgS_doOtherUser=submit&hgS_otherUserName=sjcockell&hgS_otherUserSessionName=SuppaResults&position=chr5:112876379-112922539
ENSG00000130024.14;A3:chr6:169717906-169718788:169717900-169718788:-	-0.107601	0.0462038	ENSG00000130024	A3	55274	PHF10	6	169703905	169725566	-1	protein_coding	PHD finger protein 10 [Source:HGNC Symbol;Acc:HGNC:18250]	http://genome-euro.ucsc.edu/cgi-bin/hgTracks?hgS_doOtherUser=submit&hgS_otherUserName=sjcockell&hgS_otherUserSessionName=SuppaResults&position=chr6:169703905-169725566
ENSG00000130312.6;AF:chr19:17292609:17292854-17305831:17302867:17302934-17305831:+	-0.140316	0.017982	ENSG00000130312	AF	64981	MRPL34	19	17292609	17306843	1	protein_coding	mitochondrial ribosomal protein L34 [Source:HGNC Symbol;Acc:HGNC:14488]	http://genome-euro.ucsc.edu/cgi-bin/hgTracks?hgS_doOtherUser=submit&hgS_otherUserName=sjcockell&hgS_otherUserSessionName=SuppaResults&position=chr19:17292609-17306843
ENSG00000130511.15;AF:chr19:18419355:18419707-18427351:18426040:18426083-18427351:+	0.222684	0.041958	ENSG00000130511	AF	170463	SSBP4	19	18418864	18434562	1	protein_coding	single stranded DNA binding protein 4 [Source:HGNC Symbol;Acc:HGNC:15676]	http://genome-euro.ucsc.edu/cgi-bin/hgTracks?hgS_doOtherUser=submit&hgS_otherUserName=sjcockell&hgS_otherUserSessionName=SuppaResults&position=chr19:18418864-18434562
ENSG00000130717.12;A5:chr9:131530645-131531067:131530645-131531094:-	0.159636	0.0494505	ENSG00000130717	A5	83549	UCK1	9	131523801	131531268	-1	protein_coding	uridine-cytidine kinase 1 [Source:HGNC Symbol;Acc:HGNC:14859]	http://genome-euro.ucsc.edu/cgi-bin/hgTracks?hgS_doOtherUser=submit&hgS_otherUserName=sjcockell&hgS_otherUserSessionName=SuppaResults&position=chr9:131523801-131531268
ENSG00000130723.19;SE:chr9:131473724-131474454:131476535-131477744:+	0.103415	0.026973	ENSG00000130723	SE	84726	PRRC2B	9	131394093	131500197	1	protein_coding	proline rich coiled-coil 2B [Source:HGNC Symbol;Acc:HGNC:28121]	http://genome-euro.ucsc.edu/cgi-bin/hgTracks?hgS_doOtherUser=submit&hgS_otherUserName=sjcockell&hgS_otherUserSessionName=SuppaResults&position=chr9:131394093-131500197
ENSG00000130724.8;AF:chr19:58554236-58554865:58554973:58554236-58554988:58555124:-	0.109281	0.014985	ENSG00000130724	AF	27243	CHMP2A	19	58551566	58555124	-1	protein_coding	charged multivesicular body protein 2A [Source:HGNC Symbol;Acc:HGNC:30216]	http://genome-euro.ucsc.edu/cgi-bin/hgTracks?hgS_doOtherUser=submit&hgS_otherUserName=sjcockell&hgS_otherUserSessionName=SuppaResults&position=chr19:58551566-58555124
ENSG00000131051.22;AF:chr20:35740887-35741488:35741609:35740887-35741941:35741951:-	-0.124654	0.01998	ENSG00000131051	AF	9584	RBM39	20	35701347	35742312	-1	protein_coding	RNA binding motif protein 39 [Source:HGNC Symbol;Acc:HGNC:15923]	http://genome-euro.ucsc.edu/cgi-bin/hgTracks?hgS_doOtherUser=submit&hgS_otherUserName=sjcockell&hgS_otherUserSessionName=SuppaResults&position=chr20:35701347-35742312
ENSG00000131051.22;AF:chr20:35740887-35741488:35741609:35740887-35741941:35742248:-	-0.103927	0.01998	ENSG00000131051	AF	9584	RBM39	20	35701347	35742312	-1	protein_coding	RNA binding motif protein 39 [Source:HGNC Symbol;Acc:HGNC:15923]	http://genome-euro.ucsc.edu/cgi-bin/hgTracks?hgS_doOtherUser=submit&hgS_otherUserName=sjcockell&hgS_otherUserSessionName=SuppaResults&position=chr20:35701347-35742312
ENSG00000131051.22;AF:chr20:35740887-35741488:35741609:35740887-35741941:35742258:-	-0.136117	0.01998	ENSG00000131051	AF	9584	RBM39	20	35701347	35742312	-1	protein_coding	RNA binding motif protein 39 [Source:HGNC Symbol;Acc:HGNC:15923]	http://genome-euro.ucsc.edu/cgi-bin/hgTracks?hgS_doOtherUser=submit&hgS_otherUserName=sjcockell&hgS_otherUserSessionName=SuppaResults&position=chr20:35701347-35742312
ENSG00000131051.22;AF:chr20:35740887-35741488:35741609:35740887-35741941:35742312:-	-0.164971	0.02997	ENSG00000131051	AF	9584	RBM39	20	35701347	35742312	-1	protein_coding	RNA binding motif protein 39 [Source:HGNC Symbol;Acc:HGNC:15923]	http://genome-euro.ucsc.edu/cgi-bin/hgTracks?hgS_doOtherUser=submit&hgS_otherUserName=sjcockell&hgS_otherUserSessionName=SuppaResults&position=chr20:35701347-35742312
ENSG00000131116.11;SE:chr19:43608107-43608505:43608603-43614229:-	0.125472	0.0124875	ENSG00000131116	SE	126299	ZNF428	19	43607219	43619874	-1	protein_coding	zinc finger protein 428 [Source:HGNC Symbol;Acc:HGNC:20804]	http://genome-euro.ucsc.edu/cgi-bin/hgTracks?hgS_doOtherUser=submit&hgS_otherUserName=sjcockell&hgS_otherUserSessionName=SuppaResults&position=chr19:43607219-43619874
ENSG00000131473.16;SE:chr17:41893174-41896620:41896649-41897749:-	0.102393	0.011988	ENSG00000131473	SE	47	ACLY	17	41866908	41930542	-1	protein_coding	ATP citrate lyase [Source:HGNC Symbol;Acc:HGNC:115]	http://genome-euro.ucsc.edu/cgi-bin/hgTracks?hgS_doOtherUser=submit&hgS_otherUserName=sjcockell&hgS_otherUserSessionName=SuppaResults&position=chr17:41866908-41930542
ENSG00000132274.15;AL:chr11:5708603-5709053:5710863:5708603-5714687:5715043:+	-0.51765	0.00749251	ENSG00000132274	AL	10346	TRIM22	11	5689689	5737089	1	protein_coding	tripartite motif containing 22 [Source:HGNC Symbol;Acc:HGNC:16379]	http://genome-euro.ucsc.edu/cgi-bin/hgTracks?hgS_doOtherUser=submit&hgS_otherUserName=sjcockell&hgS_otherUserSessionName=SuppaResults&position=chr11:5689689-5737089
ENSG00000133026.12;A3:chr17:8576672-8577236:8576669-8577236:-	0.184823	0.0193556	ENSG00000133026	A3	4628	MYH10	17	8474205	8630761	-1	protein_coding	myosin heavy chain 10 [Source:HGNC Symbol;Acc:HGNC:7568]	http://genome-euro.ucsc.edu/cgi-bin/hgTracks?hgS_doOtherUser=submit&hgS_otherUserName=sjcockell&hgS_otherUserSessionName=SuppaResults&position=chr17:8474205-8630761
ENSG00000133026.12;SE:chr17:8521285-8530623:8530685-8535387:-	-0.185664	0.001665	ENSG00000133026	SE	4628	MYH10	17	8474205	8630761	-1	protein_coding	myosin heavy chain 10 [Source:HGNC Symbol;Acc:HGNC:7568]	http://genome-euro.ucsc.edu/cgi-bin/hgTracks?hgS_doOtherUser=submit&hgS_otherUserName=sjcockell&hgS_otherUserSessionName=SuppaResults&position=chr17:8474205-8630761
ENSG00000133026.12;SE:chr17:8569812-8576643:8576669-8577236:-	-0.221713	0	ENSG00000133026	SE	4628	MYH10	17	8474205	8630761	-1	protein_coding	myosin heavy chain 10 [Source:HGNC Symbol;Acc:HGNC:7568]	http://genome-euro.ucsc.edu/cgi-bin/hgTracks?hgS_doOtherUser=submit&hgS_otherUserName=sjcockell&hgS_otherUserSessionName=SuppaResults&position=chr17:8474205-8630761
ENSG00000133026.12;SE:chr17:8569812-8576643:8576672-8577236:-	-0.236496	0.00124875	ENSG00000133026	SE	4628	MYH10	17	8474205	8630761	-1	protein_coding	myosin heavy chain 10 [Source:HGNC Symbol;Acc:HGNC:7568]	http://genome-euro.ucsc.edu/cgi-bin/hgTracks?hgS_doOtherUser=submit&hgS_otherUserName=sjcockell&hgS_otherUserSessionName=SuppaResults&position=chr17:8474205-8630761
ENSG00000133313.14;AF:chr18:74496307:74496431-74499882:74499342:74499375-74499882:+	-0.114868	0.015984	ENSG00000133313	AF	55748	CNDP2	18	74495816	74523454	1	protein_coding	carnosine dipeptidase 2 [Source:HGNC Symbol;Acc:HGNC:24437]	http://genome-euro.ucsc.edu/cgi-bin/hgTracks?hgS_doOtherUser=submit&hgS_otherUserName=sjcockell&hgS_otherUserSessionName=SuppaResults&position=chr18:74495816-74523454
ENSG00000133313.14;AF:chr18:74496307:74496431-74499882:74499421:74499482-74499882:+	0.351924	0	ENSG00000133313	AF	55748	CNDP2	18	74495816	74523454	1	protein_coding	carnosine dipeptidase 2 [Source:HGNC Symbol;Acc:HGNC:24437]	http://genome-euro.ucsc.edu/cgi-bin/hgTracks?hgS_doOtherUser=submit&hgS_otherUserName=sjcockell&hgS_otherUserSessionName=SuppaResults&position=chr18:74495816-74523454
ENSG00000133313.14;AF:chr18:74499342:74499375-74499882:74499421:74499482-74499882:+	0.477515	0	ENSG00000133313	AF	55748	CNDP2	18	74495816	74523454	1	protein_coding	carnosine dipeptidase 2 [Source:HGNC Symbol;Acc:HGNC:24437]	http://genome-euro.ucsc.edu/cgi-bin/hgTracks?hgS_doOtherUser=submit&hgS_otherUserName=sjcockell&hgS_otherUserSessionName=SuppaResults&position=chr18:74495816-74523454
ENSG00000133961.20;SE:chr14:73297285-73316390:73316422-73323130:-	0.221745	0.015984	ENSG00000133961	SE	8650	NUMB	14	73275107	73463642	-1	protein_coding	NUMB, endocytic adaptor protein [Source:HGNC Symbol;Acc:HGNC:8060]	http://genome-euro.ucsc.edu/cgi-bin/hgTracks?hgS_doOtherUser=submit&hgS_otherUserName=sjcockell&hgS_otherUserSessionName=SuppaResults&position=chr14:73275107-73463642
ENSG00000134283.17;AF:chr12:42326145:42326229-42335883:42331798:42331848-42335883:+	0.52009	0.0191475	ENSG00000134283	AF	51535	PPHLN1	12	42238447	42459715	1	protein_coding	periphilin 1 [Source:HGNC Symbol;Acc:HGNC:19369]	http://genome-euro.ucsc.edu/cgi-bin/hgTracks?hgS_doOtherUser=submit&hgS_otherUserName=sjcockell&hgS_otherUserSessionName=SuppaResults&position=chr12:42238447-42459715
ENSG00000134283.17;AF:chr12:42326168:42326229-42335883:42331798:42331848-42335883:+	0.286709	0.0206793	ENSG00000134283	AF	51535	PPHLN1	12	42238447	42459715	1	protein_coding	periphilin 1 [Source:HGNC Symbol;Acc:HGNC:19369]	http://genome-euro.ucsc.edu/cgi-bin/hgTracks?hgS_doOtherUser=submit&hgS_otherUserName=sjcockell&hgS_otherUserSessionName=SuppaResults&position=chr12:42238447-42459715
ENSG00000134283.17;AF:chr12:42326172:42326229-42335883:42331798:42331848-42335883:+	0.598354	0.0191475	ENSG00000134283	AF	51535	PPHLN1	12	42238447	42459715	1	protein_coding	periphilin 1 [Source:HGNC Symbol;Acc:HGNC:19369]	http://genome-euro.ucsc.edu/cgi-bin/hgTracks?hgS_doOtherUser=submit&hgS_otherUserName=sjcockell&hgS_otherUserSessionName=SuppaResults&position=chr12:42238447-42459715
ENSG00000134283.17;AF:chr12:42326178:42326229-42335883:42331798:42331848-42335883:+	0.31862	0.0191475	ENSG00000134283	AF	51535	PPHLN1	12	42238447	42459715	1	protein_coding	periphilin 1 [Source:HGNC Symbol;Acc:HGNC:19369]	http://genome-euro.ucsc.edu/cgi-bin/hgTracks?hgS_doOtherUser=submit&hgS_otherUserName=sjcockell&hgS_otherUserSessionName=SuppaResults&position=chr12:42238447-42459715
ENSG00000134283.17;SE:chr12:42331848-42332660:42332702-42335883:+	0.438275	0.0206793	ENSG00000134283	SE	51535	PPHLN1	12	42238447	42459715	1	protein_coding	periphilin 1 [Source:HGNC Symbol;Acc:HGNC:19369]	http://genome-euro.ucsc.edu/cgi-bin/hgTracks?hgS_doOtherUser=submit&hgS_otherUserName=sjcockell&hgS_otherUserSessionName=SuppaResults&position=chr12:42238447-42459715
ENSG00000134285.10;AL:chr12:48921977:48922201-48923782:48922565:48923145-48923782:-	-0.287017	0.021978	ENSG00000134285	AL	51303	FKBP11	12	48921518	48926474	-1	protein_coding	FK506 binding protein 11 [Source:HGNC Symbol;Acc:HGNC:18624]	http://genome-euro.ucsc.edu/cgi-bin/hgTracks?hgS_doOtherUser=submit&hgS_otherUserName=sjcockell&hgS_otherUserSessionName=SuppaResults&position=chr12:48921518-48926474
ENSG00000134285.10;AL:chr12:48921977:48922201-48923782:48923126:48923604-48923782:-	-0.236445	0.021978	ENSG00000134285	AL	51303	FKBP11	12	48921518	48926474	-1	protein_coding	FK506 binding protein 11 [Source:HGNC Symbol;Acc:HGNC:18624]	http://genome-euro.ucsc.edu/cgi-bin/hgTracks?hgS_doOtherUser=submit&hgS_otherUserName=sjcockell&hgS_otherUserSessionName=SuppaResults&position=chr12:48921518-48926474
ENSG00000135341.17;SE:chr6:90536401-90544552:90544632-90547258:-	0.306139	0.044955	ENSG00000135341	SE	6885	MAP3K7	6	90513573	90587045	-1	protein_coding	mitogen-activated protein kinase kinase kinase 7 [Source:HGNC Symbol;Acc:HGNC:6859]	http://genome-euro.ucsc.edu/cgi-bin/hgTracks?hgS_doOtherUser=submit&hgS_otherUserName=sjcockell&hgS_otherUserSessionName=SuppaResults&position=chr6:90513573-90587045
ENSG00000135535.16;AF:chr6:109379662-109381504:109381739:109379662-109382204:109382410:-	-0.103407	0.0374625	ENSG00000135535	AF	8763	CD164	6	109366514	109382457	-1	protein_coding	CD164 molecule [Source:HGNC Symbol;Acc:HGNC:1632]	http://genome-euro.ucsc.edu/cgi-bin/hgTracks?hgS_doOtherUser=submit&hgS_otherUserName=sjcockell&hgS_otherUserSessionName=SuppaResults&position=chr6:109366514-109382457
ENSG00000135535.16;AF:chr6:109379662-109381504:109381739:109379662-109382204:109382444:-	-0.100207	0.035964	ENSG00000135535	AF	8763	CD164	6	109366514	109382457	-1	protein_coding	CD164 molecule [Source:HGNC Symbol;Acc:HGNC:1632]	http://genome-euro.ucsc.edu/cgi-bin/hgTracks?hgS_doOtherUser=submit&hgS_otherUserName=sjcockell&hgS_otherUserSessionName=SuppaResults&position=chr6:109366514-109382457
ENSG00000135535.16;AF:chr6:109379662-109381504:109381739:109379662-109382204:109382457:-	-0.119777	0.035964	ENSG00000135535	AF	8763	CD164	6	109366514	109382457	-1	protein_coding	CD164 molecule [Source:HGNC Symbol;Acc:HGNC:1632]	http://genome-euro.ucsc.edu/cgi-bin/hgTracks?hgS_doOtherUser=submit&hgS_otherUserName=sjcockell&hgS_otherUserSessionName=SuppaResults&position=chr6:109366514-109382457
ENSG00000135535.16;AF:chr6:109379662-109381504:109381739:109379662-109382204:109382812:-	-0.16274	0.035964	ENSG00000135535	AF	8763	CD164	6	109366514	109382457	-1	protein_coding	CD164 molecule [Source:HGNC Symbol;Acc:HGNC:1632]	http://genome-euro.ucsc.edu/cgi-bin/hgTracks?hgS_doOtherUser=submit&hgS_otherUserName=sjcockell&hgS_otherUserSessionName=SuppaResults&position=chr6:109366514-109382457
ENSG00000136068.14;SE:chr3:58138529-58141858:58141896-58142650:+	0.500755	0	ENSG00000136068	SE	2317	FLNB	3	58008400	58172251	1	protein_coding	filamin B [Source:HGNC Symbol;Acc:HGNC:3755]	http://genome-euro.ucsc.edu/cgi-bin/hgTracks?hgS_doOtherUser=submit&hgS_otherUserName=sjcockell&hgS_otherUserSessionName=SuppaResults&position=chr3:58008400-58172251
ENSG00000136068.14;SE:chr3:58138529-58141858:58141929-58142650:+	0.367216	0.00174825	ENSG00000136068	SE	2317	FLNB	3	58008400	58172251	1	protein_coding	filamin B [Source:HGNC Symbol;Acc:HGNC:3755]	http://genome-euro.ucsc.edu/cgi-bin/hgTracks?hgS_doOtherUser=submit&hgS_otherUserName=sjcockell&hgS_otherUserSessionName=SuppaResults&position=chr3:58008400-58172251
ENSG00000136108.14;AF:chr13:52455429:52455626-52456523:52456008:52456179-52456523:+	0.548542	0.00799201	ENSG00000136108	AF	26586	CKAP2	13	52455429	52476628	1	protein_coding	cytoskeleton associated protein 2 [Source:HGNC Symbol;Acc:HGNC:1990]	http://genome-euro.ucsc.edu/cgi-bin/hgTracks?hgS_doOtherUser=submit&hgS_otherUserName=sjcockell&hgS_otherUserSessionName=SuppaResults&position=chr13:52455429-52476628
ENSG00000136108.14;AF:chr13:52455467:52455626-52456523:52456008:52456179-52456523:+	0.367369	0.022644	ENSG00000136108	AF	26586	CKAP2	13	52455429	52476628	1	protein_coding	cytoskeleton associated protein 2 [Source:HGNC Symbol;Acc:HGNC:1990]	http://genome-euro.ucsc.edu/cgi-bin/hgTracks?hgS_doOtherUser=submit&hgS_otherUserName=sjcockell&hgS_otherUserSessionName=SuppaResults&position=chr13:52455429-52476628
ENSG00000136108.14;SE:chr13:52456607-52460896:52460974-52461058:+	-0.243913	0.022644	ENSG00000136108	SE	26586	CKAP2	13	52455429	52476628	1	protein_coding	cytoskeleton associated protein 2 [Source:HGNC Symbol;Acc:HGNC:1990]	http://genome-euro.ucsc.edu/cgi-bin/hgTracks?hgS_doOtherUser=submit&hgS_otherUserName=sjcockell&hgS_otherUserSessionName=SuppaResults&position=chr13:52455429-52476628
ENSG00000136238.17;SE:chr7:6392041-6398662:6398718-6400126:+	0.154262	0.000999001	ENSG00000136238	SE	5879	RAC1	7	6374523	6403977	1	protein_coding	ras-related C3 botulinum toxin substrate 1 (rho family, small GTP binding protein Rac1) [Source:HGNC Symbol;Acc:HGNC:9801]	http://genome-euro.ucsc.edu/cgi-bin/hgTracks?hgS_doOtherUser=submit&hgS_otherUserName=sjcockell&hgS_otherUserSessionName=SuppaResults&position=chr7:6374523-6403977
ENSG00000136478.7;A3:chr17:64188436-64193559:64188415-64193559:-	0.145895	0.027972	ENSG00000136478	A3	55852	TEX2	17	64147227	64263301	-1	protein_coding	testis expressed 2 [Source:HGNC Symbol;Acc:HGNC:30884]	http://genome-euro.ucsc.edu/cgi-bin/hgTracks?hgS_doOtherUser=submit&hgS_otherUserName=sjcockell&hgS_otherUserSessionName=SuppaResults&position=chr17:64147227-64263301
ENSG00000136485.14;RI:chr17:63589000:63589237-63594203:63594266:+	0.153593	0.002997	ENSG00000136485	RI	10238	DCAF7	17	63550461	63594266	1	protein_coding	DDB1 and CUL4 associated factor 7 [Source:HGNC Symbol;Acc:HGNC:30915]	http://genome-euro.ucsc.edu/cgi-bin/hgTracks?hgS_doOtherUser=submit&hgS_otherUserName=sjcockell&hgS_otherUserSessionName=SuppaResults&position=chr17:63550461-63594266
ENSG00000136709.11;AF:chr2:127771004-127810749:127810953:127771004-127811012:127811147:-	-0.138754	0.041958	ENSG00000136709	AF	55339	WDR33	2	127701022	127811187	-1	protein_coding	WD repeat domain 33 [Source:HGNC Symbol;Acc:HGNC:25651]	http://genome-euro.ucsc.edu/cgi-bin/hgTracks?hgS_doOtherUser=submit&hgS_otherUserName=sjcockell&hgS_otherUserSessionName=SuppaResults&position=chr2:127701022-127811187
ENSG00000137343.17;RI:chr6:30642768:30643011-30643529:30644679:+	0.296236	0.041958	ENSG00000137343	RI	79969	ATAT1	6	30626842	30646823	1	protein_coding	alpha tubulin acetyltransferase 1 [Source:HGNC Symbol;Acc:HGNC:21186]	http://genome-euro.ucsc.edu/cgi-bin/hgTracks?hgS_doOtherUser=submit&hgS_otherUserName=sjcockell&hgS_otherUserSessionName=SuppaResults&position=chr6:30626842-30646823
ENSG00000138101.18;AF:chr2:25652661-25672780:25672946:25652661-25673386:25673429:-	0.355834	0.044955	ENSG00000138101	AF	1838	DTNB	2	25377198	25673647	-1	protein_coding	dystrobrevin beta [Source:HGNC Symbol;Acc:HGNC:3058]	http://genome-euro.ucsc.edu/cgi-bin/hgTracks?hgS_doOtherUser=submit&hgS_otherUserName=sjcockell&hgS_otherUserSessionName=SuppaResults&position=chr2:25377198-25673647
ENSG00000138101.18;AF:chr2:25652661-25672780:25672946:25652661-25673386:25673550:-	0.308454	0.044955	ENSG00000138101	AF	1838	DTNB	2	25377198	25673647	-1	protein_coding	dystrobrevin beta [Source:HGNC Symbol;Acc:HGNC:3058]	http://genome-euro.ucsc.edu/cgi-bin/hgTracks?hgS_doOtherUser=submit&hgS_otherUserName=sjcockell&hgS_otherUserSessionName=SuppaResults&position=chr2:25377198-25673647
ENSG00000138101.18;AF:chr2:25652661-25672780:25672946:25652661-25673386:25673634:-	0.363223	0.044955	ENSG00000138101	AF	1838	DTNB	2	25377198	25673647	-1	protein_coding	dystrobrevin beta [Source:HGNC Symbol;Acc:HGNC:3058]	http://genome-euro.ucsc.edu/cgi-bin/hgTracks?hgS_doOtherUser=submit&hgS_otherUserName=sjcockell&hgS_otherUserSessionName=SuppaResults&position=chr2:25377198-25673647
ENSG00000138101.18;AF:chr2:25652661-25672780:25672946:25652661-25673386:25673647:-	0.189556	0.044955	ENSG00000138101	AF	1838	DTNB	2	25377198	25673647	-1	protein_coding	dystrobrevin beta [Source:HGNC Symbol;Acc:HGNC:3058]	http://genome-euro.ucsc.edu/cgi-bin/hgTracks?hgS_doOtherUser=submit&hgS_otherUserName=sjcockell&hgS_otherUserSessionName=SuppaResults&position=chr2:25377198-25673647
ENSG00000138326.19;A3:chr10:78037304-78037439:78037304-78037965:+	-0.206378	0.0460789	ENSG00000138326	A3	6229	RPS24	10	78033760	78056812	1	protein_coding	ribosomal protein S24 [Source:HGNC Symbol;Acc:HGNC:10411]	http://genome-euro.ucsc.edu/cgi-bin/hgTracks?hgS_doOtherUser=submit&hgS_otherUserName=sjcockell&hgS_otherUserSessionName=SuppaResults&position=chr10:78033760-78056812
ENSG00000138326.19;AF:chr10:78033760:78033904-78035352:78033917:78033986-78035352:+	0.106418	0.00682651	ENSG00000138326	AF	6229	RPS24	10	78033760	78056812	1	protein_coding	ribosomal protein S24 [Source:HGNC Symbol;Acc:HGNC:10411]	http://genome-euro.ucsc.edu/cgi-bin/hgTracks?hgS_doOtherUser=submit&hgS_otherUserName=sjcockell&hgS_otherUserSessionName=SuppaResults&position=chr10:78033760-78056812
ENSG00000138326.19;SE:chr10:78037304-78037439:78037441-78040204:+	0.211654	0	ENSG00000138326	SE	6229	RPS24	10	78033760	78056812	1	protein_coding	ribosomal protein S24 [Source:HGNC Symbol;Acc:HGNC:10411]	http://genome-euro.ucsc.edu/cgi-bin/hgTracks?hgS_doOtherUser=submit&hgS_otherUserName=sjcockell&hgS_otherUserSessionName=SuppaResults&position=chr10:78033760-78056812
ENSG00000138326.19;SE:chr10:78037304-78040204:78040225-78040615:+	-0.19792	0	ENSG00000138326	SE	6229	RPS24	10	78033760	78056812	1	protein_coding	ribosomal protein S24 [Source:HGNC Symbol;Acc:HGNC:10411]	http://genome-euro.ucsc.edu/cgi-bin/hgTracks?hgS_doOtherUser=submit&hgS_otherUserName=sjcockell&hgS_otherUserSessionName=SuppaResults&position=chr10:78033760-78056812
ENSG00000138442.9;RI:chr2:202884198:202884303-202884395:202884535:-	0.122965	0.0214785	ENSG00000138442	RI	55759	WDR12	2	202874782	203014798	-1	protein_coding	WD repeat domain 12 [Source:HGNC Symbol;Acc:HGNC:14098]	http://genome-euro.ucsc.edu/cgi-bin/hgTracks?hgS_doOtherUser=submit&hgS_otherUserName=sjcockell&hgS_otherUserSessionName=SuppaResults&position=chr2:202874782-203014798
ENSG00000138768.14;SE:chr4:75757573-75760594:75760605-75770439:+	0.114063	0.002997	ENSG00000138768	SE	8615	USO1	4	75724593	75814286	1	protein_coding	USO1 vesicle transport factor [Source:HGNC Symbol;Acc:HGNC:30904]	http://genome-euro.ucsc.edu/cgi-bin/hgTracks?hgS_doOtherUser=submit&hgS_otherUserName=sjcockell&hgS_otherUserSessionName=SuppaResults&position=chr4:75724593-75814286
ENSG00000138768.14;SE:chr4:75793901-75795336:75795356-75799622:+	0.114063	0.002997	ENSG00000138768	SE	8615	USO1	4	75724593	75814286	1	protein_coding	USO1 vesicle transport factor [Source:HGNC Symbol;Acc:HGNC:30904]	http://genome-euro.ucsc.edu/cgi-bin/hgTracks?hgS_doOtherUser=submit&hgS_otherUserName=sjcockell&hgS_otherUserSessionName=SuppaResults&position=chr4:75724593-75814286
ENSG00000139163.15;SE:chr12:22673660-22682281:22682339-22684483:+	-0.178034	0.0014985	ENSG00000139163	SE	55500	ETNK1	12	22625075	22690665	1	protein_coding	ethanolamine kinase 1 [Source:HGNC Symbol;Acc:HGNC:24649]	http://genome-euro.ucsc.edu/cgi-bin/hgTracks?hgS_doOtherUser=submit&hgS_otherUserName=sjcockell&hgS_otherUserSessionName=SuppaResults&position=chr12:22625075-22690665
ENSG00000139737.21;AF:chr13:77719598:77719671-77744283:77743105:77743165-77744283:+	0.2124	0.00949051	ENSG00000139737	AF	122060	SLAIN1	13	77697854	77764242	1	protein_coding	SLAIN motif family member 1 [Source:HGNC Symbol;Acc:HGNC:26387]	http://genome-euro.ucsc.edu/cgi-bin/hgTracks?hgS_doOtherUser=submit&hgS_otherUserName=sjcockell&hgS_otherUserSessionName=SuppaResults&position=chr13:77697854-77764242
ENSG00000140632.16;SE:chr16:4821453-4821547:4821597-4822875:-	-0.125791	0.023976	ENSG00000140632	SE	84656	GLYR1	16	4803203	4847342	-1	protein_coding	glyoxylate reductase 1 homolog [Source:HGNC Symbol;Acc:HGNC:24434]	http://genome-euro.ucsc.edu/cgi-bin/hgTracks?hgS_doOtherUser=submit&hgS_otherUserName=sjcockell&hgS_otherUserSessionName=SuppaResults&position=chr16:4803203-4847342
ENSG00000141503.15;SE:chr17:4892234-4892402:4892512-4892656:+	0.157813	0.00674326	ENSG00000141503	SE	50488	MINK1	17	4833388	4898061	1	protein_coding	misshapen like kinase 1 [Source:HGNC Symbol;Acc:HGNC:17565]	http://genome-euro.ucsc.edu/cgi-bin/hgTracks?hgS_doOtherUser=submit&hgS_otherUserName=sjcockell&hgS_otherUserSessionName=SuppaResults&position=chr17:4833388-4898061
ENSG00000141503.15;SE:chr17:4893067-4893286:4893309-4893434:+	-0.141162	0.00674326	ENSG00000141503	SE	50488	MINK1	17	4833388	4898061	1	protein_coding	misshapen like kinase 1 [Source:HGNC Symbol;Acc:HGNC:17565]	http://genome-euro.ucsc.edu/cgi-bin/hgTracks?hgS_doOtherUser=submit&hgS_otherUserName=sjcockell&hgS_otherUserSessionName=SuppaResults&position=chr17:4833388-4898061
ENSG00000141668.9;AF:chr18:72538772-72542982:72543229:72538772-72543486:72543554:-	-0.2712	0.003996	ENSG00000141668	AF	147381	CBLN2	18	72536680	72638521	-1	protein_coding	cerebellin 2 precursor [Source:HGNC Symbol;Acc:HGNC:1544]	http://genome-euro.ucsc.edu/cgi-bin/hgTracks?hgS_doOtherUser=submit&hgS_otherUserName=sjcockell&hgS_otherUserSessionName=SuppaResults&position=chr18:72536680-72638521
ENSG00000143252.14;SE:chr1:161314425-161323614:161323670-161340594:+	-0.179787	0.011988	ENSG00000143252	SE	6391	SDHC	1	161314257	161375340	1	protein_coding	succinate dehydrogenase complex subunit C [Source:HGNC Symbol;Acc:HGNC:10682]	http://genome-euro.ucsc.edu/cgi-bin/hgTracks?hgS_doOtherUser=submit&hgS_otherUserName=sjcockell&hgS_otherUserSessionName=SuppaResults&position=chr1:161314257-161375340
ENSG00000143367.15;SE:chr1:151540426-151562091:151562165-151562585:+	0.232846	0.000999001	ENSG00000143367	SE	7286	TUFT1	1	151540305	151583583	1	protein_coding	tuftelin 1 [Source:HGNC Symbol;Acc:HGNC:12422]	http://genome-euro.ucsc.edu/cgi-bin/hgTracks?hgS_doOtherUser=submit&hgS_otherUserName=sjcockell&hgS_otherUserSessionName=SuppaResults&position=chr1:151540305-151583583
ENSG00000143569.18;AF:chr1:154220179:154220244-154225084:154220885:154220975-154225084:+	0.124877	0.0344655	ENSG00000143569	AF	9898	UBAP2L	1	154220179	154271510	1	protein_coding	ubiquitin associated protein 2 like [Source:HGNC Symbol;Acc:HGNC:29877]	http://genome-euro.ucsc.edu/cgi-bin/hgTracks?hgS_doOtherUser=submit&hgS_otherUserName=sjcockell&hgS_otherUserSessionName=SuppaResults&position=chr1:154220179-154271510
ENSG00000143977.13;A5:chr2:70289372-70292675:70289372-70293153:-	-0.248806	0.0191808	ENSG00000143977	A5	6637	SNRPG	2	70281362	70293771	-1	protein_coding	small nuclear ribonucleoprotein polypeptide G [Source:HGNC Symbol;Acc:HGNC:11163]	http://genome-euro.ucsc.edu/cgi-bin/hgTracks?hgS_doOtherUser=submit&hgS_otherUserName=sjcockell&hgS_otherUserSessionName=SuppaResults&position=chr2:70281362-70293771
ENSG00000143977.13;AF:chr2:70289372-70292675:70292776:70289372-70293153:70293224:-	-0.233398	0.0191808	ENSG00000143977	AF	6637	SNRPG	2	70281362	70293771	-1	protein_coding	small nuclear ribonucleoprotein polypeptide G [Source:HGNC Symbol;Acc:HGNC:11163]	http://genome-euro.ucsc.edu/cgi-bin/hgTracks?hgS_doOtherUser=submit&hgS_otherUserName=sjcockell&hgS_otherUserSessionName=SuppaResults&position=chr2:70281362-70293771
ENSG00000143977.13;AF:chr2:70289372-70292675:70292776:70289372-70293618:70293730:-	0.284027	0.0191808	ENSG00000143977	AF	6637	SNRPG	2	70281362	70293771	-1	protein_coding	small nuclear ribonucleoprotein polypeptide G [Source:HGNC Symbol;Acc:HGNC:11163]	http://genome-euro.ucsc.edu/cgi-bin/hgTracks?hgS_doOtherUser=submit&hgS_otherUserName=sjcockell&hgS_otherUserSessionName=SuppaResults&position=chr2:70281362-70293771
ENSG00000143977.13;AF:chr2:70289372-70292675:70293438:70289372-70293618:70293730:-	0.526456	0.0191808	ENSG00000143977	AF	6637	SNRPG	2	70281362	70293771	-1	protein_coding	small nuclear ribonucleoprotein polypeptide G [Source:HGNC Symbol;Acc:HGNC:11163]	http://genome-euro.ucsc.edu/cgi-bin/hgTracks?hgS_doOtherUser=submit&hgS_otherUserName=sjcockell&hgS_otherUserSessionName=SuppaResults&position=chr2:70281362-70293771
ENSG00000143977.13;AF:chr2:70289372-70293153:70293224:70289372-70293618:70293711:-	0.301321	0.0191808	ENSG00000143977	AF	6637	SNRPG	2	70281362	70293771	-1	protein_coding	small nuclear ribonucleoprotein polypeptide G [Source:HGNC Symbol;Acc:HGNC:11163]	http://genome-euro.ucsc.edu/cgi-bin/hgTracks?hgS_doOtherUser=submit&hgS_otherUserName=sjcockell&hgS_otherUserSessionName=SuppaResults&position=chr2:70281362-70293771
ENSG00000144366.15;AF:chr2:188291877:188292166-188383763:188292839:188293112-188383763:+	0.508788	0.0291375	ENSG00000144366	AF	51454	GULP1	2	188291669	188595931	1	protein_coding	GULP, engulfment adaptor PTB domain containing 1 [Source:HGNC Symbol;Acc:HGNC:18649]	http://genome-euro.ucsc.edu/cgi-bin/hgTracks?hgS_doOtherUser=submit&hgS_otherUserName=sjcockell&hgS_otherUserSessionName=SuppaResults&position=chr2:188291669-188595931
ENSG00000144366.15;AF:chr2:188291877:188292166-188383763:188293818:188294393-188383763:+	0.295221	0.0291375	ENSG00000144366	AF	51454	GULP1	2	188291669	188595931	1	protein_coding	GULP, engulfment adaptor PTB domain containing 1 [Source:HGNC Symbol;Acc:HGNC:18649]	http://genome-euro.ucsc.edu/cgi-bin/hgTracks?hgS_doOtherUser=submit&hgS_otherUserName=sjcockell&hgS_otherUserSessionName=SuppaResults&position=chr2:188291669-188595931
ENSG00000144366.15;AF:chr2:188291946:188292166-188383763:188293818:188294393-188383763:+	-0.200777	0.0291375	ENSG00000144366	AF	51454	GULP1	2	188291669	188595931	1	protein_coding	GULP, engulfment adaptor PTB domain containing 1 [Source:HGNC Symbol;Acc:HGNC:18649]	http://genome-euro.ucsc.edu/cgi-bin/hgTracks?hgS_doOtherUser=submit&hgS_otherUserName=sjcockell&hgS_otherUserSessionName=SuppaResults&position=chr2:188291669-188595931
ENSG00000144366.15;AF:chr2:188291963:188292166-188383763:188292839:188293112-188383763:+	0.186295	0.0291375	ENSG00000144366	AF	51454	GULP1	2	188291669	188595931	1	protein_coding	GULP, engulfment adaptor PTB domain containing 1 [Source:HGNC Symbol;Acc:HGNC:18649]	http://genome-euro.ucsc.edu/cgi-bin/hgTracks?hgS_doOtherUser=submit&hgS_otherUserName=sjcockell&hgS_otherUserSessionName=SuppaResults&position=chr2:188291669-188595931
ENSG00000144366.15;AF:chr2:188292839:188293112-188383763:188293818:188294393-188383763:+	-0.219562	0.0291375	ENSG00000144366	AF	51454	GULP1	2	188291669	188595931	1	protein_coding	GULP, engulfment adaptor PTB domain containing 1 [Source:HGNC Symbol;Acc:HGNC:18649]	http://genome-euro.ucsc.edu/cgi-bin/hgTracks?hgS_doOtherUser=submit&hgS_otherUserName=sjcockell&hgS_otherUserSessionName=SuppaResults&position=chr2:188291669-188595931
ENSG00000144366.15;AL:chr2:188587949-188588651:188588701:188587949-188593940:188594011:+	-0.142556	0.0291375	ENSG00000144366	AL	51454	GULP1	2	188291669	188595931	1	protein_coding	GULP, engulfment adaptor PTB domain containing 1 [Source:HGNC Symbol;Acc:HGNC:18649]	http://genome-euro.ucsc.edu/cgi-bin/hgTracks?hgS_doOtherUser=submit&hgS_otherUserName=sjcockell&hgS_otherUserSessionName=SuppaResults&position=chr2:188291669-188595931
ENSG00000144366.15;AL:chr2:188587949-188588651:188588701:188587949-188593940:188594209:+	0.125605	0.0309306	ENSG00000144366	AL	51454	GULP1	2	188291669	188595931	1	protein_coding	GULP, engulfment adaptor PTB domain containing 1 [Source:HGNC Symbol;Acc:HGNC:18649]	http://genome-euro.ucsc.edu/cgi-bin/hgTracks?hgS_doOtherUser=submit&hgS_otherUserName=sjcockell&hgS_otherUserSessionName=SuppaResults&position=chr2:188291669-188595931
ENSG00000144366.15;AL:chr2:188587949-188588651:188588701:188587949-188593940:188594281:+	0.16724	0.0291375	ENSG00000144366	AL	51454	GULP1	2	188291669	188595931	1	protein_coding	GULP, engulfment adaptor PTB domain containing 1 [Source:HGNC Symbol;Acc:HGNC:18649]	http://genome-euro.ucsc.edu/cgi-bin/hgTracks?hgS_doOtherUser=submit&hgS_otherUserName=sjcockell&hgS_otherUserSessionName=SuppaResults&position=chr2:188291669-188595931
ENSG00000144366.15;AL:chr2:188587949-188588651:188588701:188587949-188593940:188595926:+	0.119548	0.0291375	ENSG00000144366	AL	51454	GULP1	2	188291669	188595931	1	protein_coding	GULP, engulfment adaptor PTB domain containing 1 [Source:HGNC Symbol;Acc:HGNC:18649]	http://genome-euro.ucsc.edu/cgi-bin/hgTracks?hgS_doOtherUser=submit&hgS_otherUserName=sjcockell&hgS_otherUserSessionName=SuppaResults&position=chr2:188291669-188595931
ENSG00000144366.15;AL:chr2:188587949-188588651:188588701:188587949-188593940:188595931:+	0.137132	0.0291375	ENSG00000144366	AL	51454	GULP1	2	188291669	188595931	1	protein_coding	GULP, engulfment adaptor PTB domain containing 1 [Source:HGNC Symbol;Acc:HGNC:18649]	http://genome-euro.ucsc.edu/cgi-bin/hgTracks?hgS_doOtherUser=submit&hgS_otherUserName=sjcockell&hgS_otherUserSessionName=SuppaResults&position=chr2:188291669-188595931
ENSG00000145247.11;AL:chr4:48885400:48885565-48894006:48892771:48892889-48894006:-	0.624293	0.038961	ENSG00000145247	AL	132299	OCIAD2	4	48885019	48906937	-1	protein_coding	OCIA domain containing 2 [Source:HGNC Symbol;Acc:HGNC:28685]	http://genome-euro.ucsc.edu/cgi-bin/hgTracks?hgS_doOtherUser=submit&hgS_otherUserName=sjcockell&hgS_otherUserSessionName=SuppaResults&position=chr4:48885019-48906937
ENSG00000145736.14;AF:chr5:71062796-71067494:71067601:71062796-71067655:71067689:-	0.149091	0.034965	ENSG00000145736	AF	2966	GTF2H2	5	71032670	71067689	-1	protein_coding	general transcription factor IIH subunit 2 [Source:HGNC Symbol;Acc:HGNC:4656]	http://genome-euro.ucsc.edu/cgi-bin/hgTracks?hgS_doOtherUser=submit&hgS_otherUserName=sjcockell&hgS_otherUserSessionName=SuppaResults&position=chr5:71032670-71067689
ENSG00000145781.8;AF:chr5:116084991:116085093-116087497:116085474:116085606-116087497:+	-0.119321	0.041625	ENSG00000145781	AF	51397	COMMD10	5	116084991	116412762	1	protein_coding	COMM domain containing 10 [Source:HGNC Symbol;Acc:HGNC:30201]	http://genome-euro.ucsc.edu/cgi-bin/hgTracks?hgS_doOtherUser=submit&hgS_otherUserName=sjcockell&hgS_otherUserSessionName=SuppaResults&position=chr5:116084991-116412762
ENSG00000145781.8;AF:chr5:116085016:116085093-116087497:116085474:116085606-116087497:+	-0.331314	0.0274725	ENSG00000145781	AF	51397	COMMD10	5	116084991	116412762	1	protein_coding	COMM domain containing 10 [Source:HGNC Symbol;Acc:HGNC:30201]	http://genome-euro.ucsc.edu/cgi-bin/hgTracks?hgS_doOtherUser=submit&hgS_otherUserName=sjcockell&hgS_otherUserSessionName=SuppaResults&position=chr5:116084991-116412762
ENSG00000145781.8;AF:chr5:116085026:116085093-116087497:116085474:116085606-116087497:+	-0.112963	0.0312188	ENSG00000145781	AF	51397	COMMD10	5	116084991	116412762	1	protein_coding	COMM domain containing 10 [Source:HGNC Symbol;Acc:HGNC:30201]	http://genome-euro.ucsc.edu/cgi-bin/hgTracks?hgS_doOtherUser=submit&hgS_otherUserName=sjcockell&hgS_otherUserSessionName=SuppaResults&position=chr5:116084991-116412762
ENSG00000146540.14;A5:chr7:1127386-1138189:1127386-1138218:-	0.108239	0.0224775	ENSG00000146540	A5	84310	C7orf50	7	996986	1138260	-1	protein_coding	chromosome 7 open reading frame 50 [Source:HGNC Symbol;Acc:HGNC:22421]	http://genome-euro.ucsc.edu/cgi-bin/hgTracks?hgS_doOtherUser=submit&hgS_otherUserName=sjcockell&hgS_otherUserSessionName=SuppaResults&position=chr7:996986-1138260
ENSG00000146733.13;A5:chr7:56034154-56051138:56034154-56051314:-	0.172219	0.0382118	ENSG00000146733	A5	5723	PSPH	7	56011051	56051604	-1	protein_coding	phosphoserine phosphatase [Source:HGNC Symbol;Acc:HGNC:9577]	http://genome-euro.ucsc.edu/cgi-bin/hgTracks?hgS_doOtherUser=submit&hgS_otherUserName=sjcockell&hgS_otherUserSessionName=SuppaResults&position=chr7:56011051-56051604
ENSG00000146733.13;AF:chr7:56034154-56051138:56051288:56034154-56051314:56051467:-	0.310726	0.0382118	ENSG00000146733	AF	5723	PSPH	7	56011051	56051604	-1	protein_coding	phosphoserine phosphatase [Source:HGNC Symbol;Acc:HGNC:9577]	http://genome-euro.ucsc.edu/cgi-bin/hgTracks?hgS_doOtherUser=submit&hgS_otherUserName=sjcockell&hgS_otherUserSessionName=SuppaResults&position=chr7:56011051-56051604
ENSG00000146963.17;AF:chr7:139359908:139360322-139376062:139371412:139371463-139376062:+	0.15129	0.00599401	ENSG00000146963	AF	51631	LUC7L2	7	139340359	139423457	1	protein_coding	LUC7 like 2, pre-mRNA splicing factor [Source:HGNC Symbol;Acc:HGNC:21608]	http://genome-euro.ucsc.edu/cgi-bin/hgTracks?hgS_doOtherUser=submit&hgS_otherUserName=sjcockell&hgS_otherUserSessionName=SuppaResults&position=chr7:139340359-139423457
ENSG00000147324.10;AF:chr8:8797491-8821820:8821864:8797491-8859990:8860031:-	0.173062	0.0494505	ENSG00000147324	AF	9258	MFHAS1	8	8783354	8893645	-1	protein_coding	malignant fibrous histiocytoma amplified sequence 1 [Source:HGNC Symbol;Acc:HGNC:16982]	http://genome-euro.ucsc.edu/cgi-bin/hgTracks?hgS_doOtherUser=submit&hgS_otherUserName=sjcockell&hgS_otherUserSessionName=SuppaResults&position=chr8:8783354-8893645
ENSG00000147676.13;AF:chr8:119207949:119208093-119221587:119208868:119209200-119221587:+	-0.336802	0.011988	ENSG00000147676	AF	114569	MAL2	8	119165034	119245673	1	protein_coding	mal, T-cell differentiation protein 2 (gene/pseudogene) [Source:HGNC Symbol;Acc:HGNC:13634]	http://genome-euro.ucsc.edu/cgi-bin/hgTracks?hgS_doOtherUser=submit&hgS_otherUserName=sjcockell&hgS_otherUserSessionName=SuppaResults&position=chr8:119165034-119245673
ENSG00000149182.14;SE:chr11:47172333-47172710:47172751-47173426:-	0.167164	0.034965	ENSG00000149182	SE	84364	ARFGAP2	11	47164299	47177125	-1	protein_coding	ADP ribosylation factor GTPase activating protein 2 [Source:HGNC Symbol;Acc:HGNC:13504]	http://genome-euro.ucsc.edu/cgi-bin/hgTracks?hgS_doOtherUser=submit&hgS_otherUserName=sjcockell&hgS_otherUserSessionName=SuppaResults&position=chr11:47164299-47177125
ENSG00000149792.8;A5:chr11:65122424-65125488:65122340-65125488:+	0.481778	0.0224775	ENSG00000149792	A5	740	MRPL49	11	65122183	65127371	1	protein_coding	mitochondrial ribosomal protein L49 [Source:HGNC Symbol;Acc:HGNC:1176]	http://genome-euro.ucsc.edu/cgi-bin/hgTracks?hgS_doOtherUser=submit&hgS_otherUserName=sjcockell&hgS_otherUserSessionName=SuppaResults&position=chr11:65122183-65127371
ENSG00000149792.8;SE:chr11:65122340-65124502:65124652-65125488:+	0.431857	0.0224775	ENSG00000149792	SE	740	MRPL49	11	65122183	65127371	1	protein_coding	mitochondrial ribosomal protein L49 [Source:HGNC Symbol;Acc:HGNC:1176]	http://genome-euro.ucsc.edu/cgi-bin/hgTracks?hgS_doOtherUser=submit&hgS_otherUserName=sjcockell&hgS_otherUserSessionName=SuppaResults&position=chr11:65122183-65127371
ENSG00000151503.12;AF:chr11:134224000-134224287:134224545:134224000-134225097:134225454:-	0.296773	0.0367133	ENSG00000151503	AF	23310	NCAPD3	11	134150119	134225454	-1	protein_coding	non-SMC condensin II complex subunit D3 [Source:HGNC Symbol;Acc:HGNC:28952]	http://genome-euro.ucsc.edu/cgi-bin/hgTracks?hgS_doOtherUser=submit&hgS_otherUserName=sjcockell&hgS_otherUserSessionName=SuppaResults&position=chr11:134150119-134225454
ENSG00000151503.12;AL:chr11:134220686:134220726-134223863:134223093:134223482-134223863:-	-0.345529	0.020979	ENSG00000151503	AL	23310	NCAPD3	11	134150119	134225454	-1	protein_coding	non-SMC condensin II complex subunit D3 [Source:HGNC Symbol;Acc:HGNC:28952]	http://genome-euro.ucsc.edu/cgi-bin/hgTracks?hgS_doOtherUser=submit&hgS_otherUserName=sjcockell&hgS_otherUserSessionName=SuppaResults&position=chr11:134150119-134225454
ENSG00000152556.16;A5:chr12:48135383-48137721:48135038-48137721:+	0.293337	0.010656	ENSG00000152556	A5	5213	PFKM	12	48105139	48146404	1	protein_coding	phosphofructokinase, muscle [Source:HGNC Symbol;Acc:HGNC:8877]	http://genome-euro.ucsc.edu/cgi-bin/hgTracks?hgS_doOtherUser=submit&hgS_otherUserName=sjcockell&hgS_otherUserSessionName=SuppaResults&position=chr12:48105139-48146404
ENSG00000152556.16;AF:chr12:48119230:48119406-48122767:48119787:48119929-48122767:+	0.234496	0.031968	ENSG00000152556	AF	5213	PFKM	12	48105139	48146404	1	protein_coding	phosphofructokinase, muscle [Source:HGNC Symbol;Acc:HGNC:8877]	http://genome-euro.ucsc.edu/cgi-bin/hgTracks?hgS_doOtherUser=submit&hgS_otherUserName=sjcockell&hgS_otherUserSessionName=SuppaResults&position=chr12:48105139-48146404
ENSG00000152556.16;AF:chr12:48119343:48119406-48122767:48119787:48119929-48122767:+	0.279181	0	ENSG00000152556	AF	5213	PFKM	12	48105139	48146404	1	protein_coding	phosphofructokinase, muscle [Source:HGNC Symbol;Acc:HGNC:8877]	http://genome-euro.ucsc.edu/cgi-bin/hgTracks?hgS_doOtherUser=submit&hgS_otherUserName=sjcockell&hgS_otherUserSessionName=SuppaResults&position=chr12:48105139-48146404
ENSG00000152556.16;SE:chr12:48135038-48135291:48135383-48137721:+	0.189116	0	ENSG00000152556	SE	5213	PFKM	12	48105139	48146404	1	protein_coding	phosphofructokinase, muscle [Source:HGNC Symbol;Acc:HGNC:8877]	http://genome-euro.ucsc.edu/cgi-bin/hgTracks?hgS_doOtherUser=submit&hgS_otherUserName=sjcockell&hgS_otherUserSessionName=SuppaResults&position=chr12:48105139-48146404
ENSG00000153187.18;A3:chr1:244856625-244856728:244856158-244856728:-	0.45592	0.034965	ENSG00000153187	A3	3192	HNRNPU	1	244840638	244864560	-1	protein_coding	heterogeneous nuclear ribonucleoprotein U [Source:HGNC Symbol;Acc:HGNC:5048]	http://genome-euro.ucsc.edu/cgi-bin/hgTracks?hgS_doOtherUser=submit&hgS_otherUserName=sjcockell&hgS_otherUserSessionName=SuppaResults&position=chr1:244840638-244864560
ENSG00000154654.14;AF:chr21:20998315:20998618-21280578:21239342:21239411-21280578:+	0.146387	0.034965	ENSG00000154654	AF	4685	NCAM2	21	20998315	21543329	1	protein_coding	neural cell adhesion molecule 2 [Source:HGNC Symbol;Acc:HGNC:7657]	http://genome-euro.ucsc.edu/cgi-bin/hgTracks?hgS_doOtherUser=submit&hgS_otherUserName=sjcockell&hgS_otherUserSessionName=SuppaResults&position=chr21:20998315-21543329
ENSG00000154734.14;AF:chr21:26842685-26842990:26843018:26842685-26843466:26843540:-	0.177811	0.045954	ENSG00000154734	AF	9510	ADAMTS1	21	26835747	26845409	-1	protein_coding	ADAM metallopeptidase with thrombospondin type 1 motif 1 [Source:HGNC Symbol;Acc:HGNC:217]	http://genome-euro.ucsc.edu/cgi-bin/hgTracks?hgS_doOtherUser=submit&hgS_otherUserName=sjcockell&hgS_otherUserSessionName=SuppaResults&position=chr21:26835747-26845409
ENSG00000154734.14;AF:chr21:26842685-26842990:26843018:26842685-26843742:26843777:-	0.149318	0.01998	ENSG00000154734	AF	9510	ADAMTS1	21	26835747	26845409	-1	protein_coding	ADAM metallopeptidase with thrombospondin type 1 motif 1 [Source:HGNC Symbol;Acc:HGNC:217]	http://genome-euro.ucsc.edu/cgi-bin/hgTracks?hgS_doOtherUser=submit&hgS_otherUserName=sjcockell&hgS_otherUserSessionName=SuppaResults&position=chr21:26835747-26845409
ENSG00000156253.6;A5:chr21:29008123-29008240:29008123-29008395:-	-0.252922	0.038961	ENSG00000156253	A5	10069	RWDD2B	21	29004384	29019378	-1	protein_coding	RWD domain containing 2B [Source:HGNC Symbol;Acc:HGNC:1302]	http://genome-euro.ucsc.edu/cgi-bin/hgTracks?hgS_doOtherUser=submit&hgS_otherUserName=sjcockell&hgS_otherUserSessionName=SuppaResults&position=chr21:29004384-29019378
ENSG00000156253.6;RI:chr21:29008240:29008307-29008395:29008621:-	-0.165417	0.044955	ENSG00000156253	RI	10069	RWDD2B	21	29004384	29019378	-1	protein_coding	RWD domain containing 2B [Source:HGNC Symbol;Acc:HGNC:1302]	http://genome-euro.ucsc.edu/cgi-bin/hgTracks?hgS_doOtherUser=submit&hgS_otherUserName=sjcockell&hgS_otherUserSessionName=SuppaResults&position=chr21:29004384-29019378
ENSG00000156976.16;RI:chr3:186784564:186784696-186785883:186786051:+	0.115108	0.0157343	ENSG00000156976	RI	1974	EIF4A2	3	186783205	186789900	1	protein_coding	eukaryotic translation initiation factor 4A2 [Source:HGNC Symbol;Acc:HGNC:3284]	http://genome-euro.ucsc.edu/cgi-bin/hgTracks?hgS_doOtherUser=submit&hgS_otherUserName=sjcockell&hgS_otherUserSessionName=SuppaResults&position=chr3:186783205-186789900
ENSG00000156976.16;SE:chr3:186787882-186788310:186788416-186789125:+	0.296237	0	ENSG00000156976	SE	1974	EIF4A2	3	186783205	186789900	1	protein_coding	eukaryotic translation initiation factor 4A2 [Source:HGNC Symbol;Acc:HGNC:3284]	http://genome-euro.ucsc.edu/cgi-bin/hgTracks?hgS_doOtherUser=submit&hgS_otherUserName=sjcockell&hgS_otherUserSessionName=SuppaResults&position=chr3:186783205-186789900
ENSG00000156976.16;SE:chr3:186787882-186788310:186788420-186789125:+	0.244624	0	ENSG00000156976	SE	1974	EIF4A2	3	186783205	186789900	1	protein_coding	eukaryotic translation initiation factor 4A2 [Source:HGNC Symbol;Acc:HGNC:3284]	http://genome-euro.ucsc.edu/cgi-bin/hgTracks?hgS_doOtherUser=submit&hgS_otherUserName=sjcockell&hgS_otherUserSessionName=SuppaResults&position=chr3:186783205-186789900
ENSG00000157514.16;AF:chrX:107715950-107716315:107716545:107715950-107716690:107717135:-	-0.214953	0.00599401	ENSG00000157514	AF	1831	TSC22D3	X	107713221	107777342	-1	protein_coding	TSC22 domain family member 3 [Source:HGNC Symbol;Acc:HGNC:3051]	http://genome-euro.ucsc.edu/cgi-bin/hgTracks?hgS_doOtherUser=submit&hgS_otherUserName=sjcockell&hgS_otherUserSessionName=SuppaResults&position=chrX:107713221-107777342
ENSG00000158710.14;AF:chr1:159920537-159923436:159923717:159920537-159924494:159924551:-	0.382121	0.0384615	ENSG00000158710	AF	8407	TAGLN2	1	159918107	159925732	-1	protein_coding	transgelin 2 [Source:HGNC Symbol;Acc:HGNC:11554]	http://genome-euro.ucsc.edu/cgi-bin/hgTracks?hgS_doOtherUser=submit&hgS_otherUserName=sjcockell&hgS_otherUserSessionName=SuppaResults&position=chr1:159918107-159925732
ENSG00000158710.14;AF:chr1:159920537-159924494:159924551:159920537-159925019:159925229:-	-0.263569	0.048951	ENSG00000158710	AF	8407	TAGLN2	1	159918107	159925732	-1	protein_coding	transgelin 2 [Source:HGNC Symbol;Acc:HGNC:11554]	http://genome-euro.ucsc.edu/cgi-bin/hgTracks?hgS_doOtherUser=submit&hgS_otherUserName=sjcockell&hgS_otherUserSessionName=SuppaResults&position=chr1:159918107-159925732
ENSG00000158710.14;AF:chr1:159920537-159924494:159924551:159920537-159925450:159925491:-	-0.296202	0.048951	ENSG00000158710	AF	8407	TAGLN2	1	159918107	159925732	-1	protein_coding	transgelin 2 [Source:HGNC Symbol;Acc:HGNC:11554]	http://genome-euro.ucsc.edu/cgi-bin/hgTracks?hgS_doOtherUser=submit&hgS_otherUserName=sjcockell&hgS_otherUserSessionName=SuppaResults&position=chr1:159918107-159925732
ENSG00000159023.20;AL:chr1:29065158-29065684:29065736:29065158-29097807:29097849:+	0.54996	0.035964	ENSG00000159023	AL	2035	EPB41	1	28887091	29120046	1	protein_coding	erythrocyte membrane protein band 4.1 [Source:HGNC Symbol;Acc:HGNC:3377]	http://genome-euro.ucsc.edu/cgi-bin/hgTracks?hgS_doOtherUser=submit&hgS_otherUserName=sjcockell&hgS_otherUserSessionName=SuppaResults&position=chr1:28887091-29120046
ENSG00000159023.20;MX:chr1:29053312-29058589:29058645-29064982:29053312-29060422:29060484-29064982:+	0.207968	0.035964	ENSG00000159023	MX	2035	EPB41	1	28887091	29120046	1	protein_coding	erythrocyte membrane protein band 4.1 [Source:HGNC Symbol;Acc:HGNC:3377]	http://genome-euro.ucsc.edu/cgi-bin/hgTracks?hgS_doOtherUser=submit&hgS_otherUserName=sjcockell&hgS_otherUserSessionName=SuppaResults&position=chr1:28887091-29120046
ENSG00000159023.20;MX:chr1:29065158-29068733:29068768-29097807:29065158-29096155:29096604-29097807:+	-0.215057	0.047952	ENSG00000159023	MX	2035	EPB41	1	28887091	29120046	1	protein_coding	erythrocyte membrane protein band 4.1 [Source:HGNC Symbol;Acc:HGNC:3377]	http://genome-euro.ucsc.edu/cgi-bin/hgTracks?hgS_doOtherUser=submit&hgS_otherUserName=sjcockell&hgS_otherUserSessionName=SuppaResults&position=chr1:28887091-29120046
ENSG00000159023.20;SE:chr1:29053312-29058589:29058645-29064982:+	0.239883	0.035964	ENSG00000159023	SE	2035	EPB41	1	28887091	29120046	1	protein_coding	erythrocyte membrane protein band 4.1 [Source:HGNC Symbol;Acc:HGNC:3377]	http://genome-euro.ucsc.edu/cgi-bin/hgTracks?hgS_doOtherUser=submit&hgS_otherUserName=sjcockell&hgS_otherUserSessionName=SuppaResults&position=chr1:28887091-29120046
ENSG00000159023.20;SE:chr1:29065158-29096155:29096604-29097807:+	0.199607	0.031968	ENSG00000159023	SE	2035	EPB41	1	28887091	29120046	1	protein_coding	erythrocyte membrane protein band 4.1 [Source:HGNC Symbol;Acc:HGNC:3377]	http://genome-euro.ucsc.edu/cgi-bin/hgTracks?hgS_doOtherUser=submit&hgS_otherUserName=sjcockell&hgS_otherUserSessionName=SuppaResults&position=chr1:28887091-29120046
ENSG00000159461.14;AF:chr16:56414344-56424831:56424871:56414344-56424911:56424995:-	0.417524	0.013986	ENSG00000159461	AF	267	AMFR	16	56361452	56425538	-1	protein_coding	autocrine motility factor receptor [Source:HGNC Symbol;Acc:HGNC:463]	http://genome-euro.ucsc.edu/cgi-bin/hgTracks?hgS_doOtherUser=submit&hgS_otherUserName=sjcockell&hgS_otherUserSessionName=SuppaResults&position=chr16:56361452-56425538
ENSG00000159461.14;AF:chr16:56414344-56424911:56424995:56414344-56425073:56425538:-	-0.104647	0.022644	ENSG00000159461	AF	267	AMFR	16	56361452	56425538	-1	protein_coding	autocrine motility factor receptor [Source:HGNC Symbol;Acc:HGNC:463]	http://genome-euro.ucsc.edu/cgi-bin/hgTracks?hgS_doOtherUser=submit&hgS_otherUserName=sjcockell&hgS_otherUserSessionName=SuppaResults&position=chr16:56361452-56425538
ENSG00000159461.14;SE:chr16:56386022-56388758:56388853-56389185:-	-0.101224	0.013986	ENSG00000159461	SE	267	AMFR	16	56361452	56425538	-1	protein_coding	autocrine motility factor receptor [Source:HGNC Symbol;Acc:HGNC:463]	http://genome-euro.ucsc.edu/cgi-bin/hgTracks?hgS_doOtherUser=submit&hgS_otherUserName=sjcockell&hgS_otherUserSessionName=SuppaResults&position=chr16:56361452-56425538
ENSG00000159692.15;AF:chr4:1241519-1248661:1248740:1241519-1248916:1248976:-	0.249125	0.022977	ENSG00000159692	AF	1487	CTBP1	4	1211448	1249953	-1	protein_coding	C-terminal binding protein 1 [Source:HGNC Symbol;Acc:HGNC:2494]	http://genome-euro.ucsc.edu/cgi-bin/hgTracks?hgS_doOtherUser=submit&hgS_otherUserName=sjcockell&hgS_otherUserSessionName=SuppaResults&position=chr4:1211448-1249953
ENSG00000159720.11;AF:chr16:67444706-67453544:67453715:67444706-67480957:67481148:-	0.176382	0.0494505	ENSG00000159720	AF	9114	ATP6V0D1	16	67438014	67481237	-1	protein_coding	ATPase H+ transporting V0 subunit d1 [Source:HGNC Symbol;Acc:HGNC:13724]	http://genome-euro.ucsc.edu/cgi-bin/hgTracks?hgS_doOtherUser=submit&hgS_otherUserName=sjcockell&hgS_otherUserSessionName=SuppaResults&position=chr16:67438014-67481237
ENSG00000159720.11;SE:chr16:67443178-67444528:67444706-67480957:-	-0.317623	0.00899101	ENSG00000159720	SE	9114	ATP6V0D1	16	67438014	67481237	-1	protein_coding	ATPase H+ transporting V0 subunit d1 [Source:HGNC Symbol;Acc:HGNC:13724]	http://genome-euro.ucsc.edu/cgi-bin/hgTracks?hgS_doOtherUser=submit&hgS_otherUserName=sjcockell&hgS_otherUserSessionName=SuppaResults&position=chr16:67438014-67481237
ENSG00000160014.16;AF:chr19:46601074:46601176-46605827:46601366:46601437-46605827:+	0.39471	0	ENSG00000160014	AF	805	CALM3	19	46601074	46610793	1	protein_coding	calmodulin 3 [Source:HGNC Symbol;Acc:HGNC:1449]	http://genome-euro.ucsc.edu/cgi-bin/hgTracks?hgS_doOtherUser=submit&hgS_otherUserName=sjcockell&hgS_otherUserSessionName=SuppaResults&position=chr19:46601074-46610793
ENSG00000160014.16;AF:chr19:46601366:46601437-46605827:46602072:46602210-46605827:+	-0.281538	0.0208125	ENSG00000160014	AF	805	CALM3	19	46601074	46610793	1	protein_coding	calmodulin 3 [Source:HGNC Symbol;Acc:HGNC:1449]	http://genome-euro.ucsc.edu/cgi-bin/hgTracks?hgS_doOtherUser=submit&hgS_otherUserName=sjcockell&hgS_otherUserSessionName=SuppaResults&position=chr19:46601074-46610793
ENSG00000160014.16;AF:chr19:46601366:46601437-46605827:46605193:46605305-46605827:+	-0.306029	0.0187313	ENSG00000160014	AF	805	CALM3	19	46601074	46610793	1	protein_coding	calmodulin 3 [Source:HGNC Symbol;Acc:HGNC:1449]	http://genome-euro.ucsc.edu/cgi-bin/hgTracks?hgS_doOtherUser=submit&hgS_otherUserName=sjcockell&hgS_otherUserSessionName=SuppaResults&position=chr19:46601074-46610793
ENSG00000160211.16;AF:chrX:154546163-154546789:154546870:154546163-154547468:154547572:-	0.151805	0.0224775	ENSG00000160211	AF	2539	G6PD	X	154531391	154547572	-1	protein_coding	glucose-6-phosphate dehydrogenase [Source:HGNC Symbol;Acc:HGNC:4057]	http://genome-euro.ucsc.edu/cgi-bin/hgTracks?hgS_doOtherUser=submit&hgS_otherUserName=sjcockell&hgS_otherUserSessionName=SuppaResults&position=chrX:154531391-154547572
ENSG00000160789.19;AF:chr1:156114707:156115274-156130617:156126545:156126651-156130617:+	0.144781	0.0382118	ENSG00000160789	AF	4000	LMNA	1	156082573	156140089	1	protein_coding	lamin A/C [Source:HGNC Symbol;Acc:HGNC:6636]	http://genome-euro.ucsc.edu/cgi-bin/hgTracks?hgS_doOtherUser=submit&hgS_otherUserName=sjcockell&hgS_otherUserSessionName=SuppaResults&position=chr1:156082573-156140089
ENSG00000160789.19;AF:chr1:156114722:156115274-156130617:156126545:156126651-156130617:+	0.244163	0.0382118	ENSG00000160789	AF	4000	LMNA	1	156082573	156140089	1	protein_coding	lamin A/C [Source:HGNC Symbol;Acc:HGNC:6636]	http://genome-euro.ucsc.edu/cgi-bin/hgTracks?hgS_doOtherUser=submit&hgS_otherUserName=sjcockell&hgS_otherUserSessionName=SuppaResults&position=chr1:156082573-156140089
ENSG00000161016.17;A5:chr8:144792140-144792245:144792140-144792266:-	0.104212	0.023976	ENSG00000161016	A5	6132	RPL8	8	144789765	144792587	-1	protein_coding	ribosomal protein L8 [Source:HGNC Symbol;Acc:HGNC:10368]	http://genome-euro.ucsc.edu/cgi-bin/hgTracks?hgS_doOtherUser=submit&hgS_otherUserName=sjcockell&hgS_otherUserSessionName=SuppaResults&position=chr8:144789765-144792587
ENSG00000161203.13;SE:chr3:184180251-184180645:184180650-184180849:+	0.115285	0.03996	ENSG00000161203	SE	1173	AP2M1	3	184174689	184184091	1	protein_coding	adaptor related protein complex 2 mu 1 subunit [Source:HGNC Symbol;Acc:HGNC:564]	http://genome-euro.ucsc.edu/cgi-bin/hgTracks?hgS_doOtherUser=submit&hgS_otherUserName=sjcockell&hgS_otherUserSessionName=SuppaResults&position=chr3:184174689-184184091
ENSG00000162144.9;A3:chr11:61350422-61350991:61349643-61350991:-	-0.361627	0	ENSG00000162144	A3	220002	CYB561A3	11	61348745	61362299	-1	protein_coding	cytochrome b561 family member A3 [Source:HGNC Symbol;Acc:HGNC:23014]	http://genome-euro.ucsc.edu/cgi-bin/hgTracks?hgS_doOtherUser=submit&hgS_otherUserName=sjcockell&hgS_otherUserSessionName=SuppaResults&position=chr11:61348745-61362299
ENSG00000162144.9;A5:chr11:61356728-61357203:61356728-61357312:-	0.842129	0.00224775	ENSG00000162144	A5	220002	CYB561A3	11	61348745	61362299	-1	protein_coding	cytochrome b561 family member A3 [Source:HGNC Symbol;Acc:HGNC:23014]	http://genome-euro.ucsc.edu/cgi-bin/hgTracks?hgS_doOtherUser=submit&hgS_otherUserName=sjcockell&hgS_otherUserSessionName=SuppaResults&position=chr11:61348745-61362299
ENSG00000162144.9;AF:chr11:61356728-61357312:61357347:61356728-61357733:61361264:-	-0.832214	0	ENSG00000162144	AF	220002	CYB561A3	11	61348745	61362299	-1	protein_coding	cytochrome b561 family member A3 [Source:HGNC Symbol;Acc:HGNC:23014]	http://genome-euro.ucsc.edu/cgi-bin/hgTracks?hgS_doOtherUser=submit&hgS_otherUserName=sjcockell&hgS_otherUserSessionName=SuppaResults&position=chr11:61348745-61362299
ENSG00000162144.9;AF:chr11:61356728-61357312:61357347:61356728-61361733:61362271:-	-0.904176	0	ENSG00000162144	AF	220002	CYB561A3	11	61348745	61362299	-1	protein_coding	cytochrome b561 family member A3 [Source:HGNC Symbol;Acc:HGNC:23014]	http://genome-euro.ucsc.edu/cgi-bin/hgTracks?hgS_doOtherUser=submit&hgS_otherUserName=sjcockell&hgS_otherUserSessionName=SuppaResults&position=chr11:61348745-61362299
ENSG00000163257.10;AL:chr4:17804312:17804756-17810447:17809425:17809692-17810447:-	0.128159	0.0494505	ENSG00000163257	AL	54876	DCAF16	4	17800655	17810758	-1	protein_coding	DDB1 and CUL4 associated factor 16 [Source:HGNC Symbol;Acc:HGNC:25987]	http://genome-euro.ucsc.edu/cgi-bin/hgTracks?hgS_doOtherUser=submit&hgS_otherUserName=sjcockell&hgS_otherUserSessionName=SuppaResults&position=chr4:17800655-17810758
ENSG00000163584.17;AF:chr3:170868390-170869965:170870033:170868390-170870159:170870195:-	0.117154	0.003996	ENSG00000163584	AF	200916	RPL22L1	3	170864875	170870483	-1	protein_coding	ribosomal protein L22 like 1 [Source:HGNC Symbol;Acc:HGNC:27610]	http://genome-euro.ucsc.edu/cgi-bin/hgTracks?hgS_doOtherUser=submit&hgS_otherUserName=sjcockell&hgS_otherUserSessionName=SuppaResults&position=chr3:170864875-170870483
ENSG00000164062.12;A5:chr3:49674621-49675694:49674413-49675694:+	-0.222692	0.033966	ENSG00000164062	A5	327	APEH	3	49674002	49683963	1	protein_coding	acylaminoacyl-peptide hydrolase [Source:HGNC Symbol;Acc:HGNC:586]	http://genome-euro.ucsc.edu/cgi-bin/hgTracks?hgS_doOtherUser=submit&hgS_otherUserName=sjcockell&hgS_otherUserSessionName=SuppaResults&position=chr3:49674002-49683963
ENSG00000164062.12;AF:chr3:49674014:49674110-49675694:49674367:49674413-49675694:+	-0.372422	0	ENSG00000164062	AF	327	APEH	3	49674002	49683963	1	protein_coding	acylaminoacyl-peptide hydrolase [Source:HGNC Symbol;Acc:HGNC:586]	http://genome-euro.ucsc.edu/cgi-bin/hgTracks?hgS_doOtherUser=submit&hgS_otherUserName=sjcockell&hgS_otherUserSessionName=SuppaResults&position=chr3:49674002-49683963
ENSG00000164081.12;A5:chr3:51672301-51674271:51671331-51674271:+	-0.446099	0.048951	ENSG00000164081	A5	51368	TEX264	3	51662693	51704323	1	protein_coding	testis expressed 264 [Source:HGNC Symbol;Acc:HGNC:30247]	http://genome-euro.ucsc.edu/cgi-bin/hgTracks?hgS_doOtherUser=submit&hgS_otherUserName=sjcockell&hgS_otherUserSessionName=SuppaResults&position=chr3:51662693-51704323
ENSG00000164081.12;AF:chr3:51671175:51671288-51674271:51671296:51671331-51674271:+	-0.543762	0.04662	ENSG00000164081	AF	51368	TEX264	3	51662693	51704323	1	protein_coding	testis expressed 264 [Source:HGNC Symbol;Acc:HGNC:30247]	http://genome-euro.ucsc.edu/cgi-bin/hgTracks?hgS_doOtherUser=submit&hgS_otherUserName=sjcockell&hgS_otherUserSessionName=SuppaResults&position=chr3:51662693-51704323
ENSG00000164081.12;AF:chr3:51671296:51671331-51674271:51671828:51672301-51674271:+	0.568482	0.04662	ENSG00000164081	AF	51368	TEX264	3	51662693	51704323	1	protein_coding	testis expressed 264 [Source:HGNC Symbol;Acc:HGNC:30247]	http://genome-euro.ucsc.edu/cgi-bin/hgTracks?hgS_doOtherUser=submit&hgS_otherUserName=sjcockell&hgS_otherUserSessionName=SuppaResults&position=chr3:51662693-51704323
ENSG00000164081.12;AF:chr3:51671296:51671331-51674271:51671895:51672083-51674271:+	0.542051	0.04662	ENSG00000164081	AF	51368	TEX264	3	51662693	51704323	1	protein_coding	testis expressed 264 [Source:HGNC Symbol;Acc:HGNC:30247]	http://genome-euro.ucsc.edu/cgi-bin/hgTracks?hgS_doOtherUser=submit&hgS_otherUserName=sjcockell&hgS_otherUserSessionName=SuppaResults&position=chr3:51662693-51704323
ENSG00000164116.16;AF:chr4:155666711:155666965-155667346:155667042:155667220-155667346:+	0.352601	0.0412088	ENSG00000164116	AF	2982	GUCY1A3	4	155666711	155732349	1	protein_coding	guanylate cyclase 1 soluble subunit alpha [Source:HGNC Symbol;Acc:HGNC:4685]	http://genome-euro.ucsc.edu/cgi-bin/hgTracks?hgS_doOtherUser=submit&hgS_otherUserName=sjcockell&hgS_otherUserSessionName=SuppaResults&position=chr4:155666711-155732349
ENSG00000164116.16;AF:chr4:155666711:155666965-155667346:155667104:155667220-155667346:+	0.514048	0.0412088	ENSG00000164116	AF	2982	GUCY1A3	4	155666711	155732349	1	protein_coding	guanylate cyclase 1 soluble subunit alpha [Source:HGNC Symbol;Acc:HGNC:4685]	http://genome-euro.ucsc.edu/cgi-bin/hgTracks?hgS_doOtherUser=submit&hgS_otherUserName=sjcockell&hgS_otherUserSessionName=SuppaResults&position=chr4:155666711-155732349
ENSG00000164116.16;AF:chr4:155666711:155666965-155667346:155667129:155667220-155667346:+	0.257318	0.0412088	ENSG00000164116	AF	2982	GUCY1A3	4	155666711	155732349	1	protein_coding	guanylate cyclase 1 soluble subunit alpha [Source:HGNC Symbol;Acc:HGNC:4685]	http://genome-euro.ucsc.edu/cgi-bin/hgTracks?hgS_doOtherUser=submit&hgS_otherUserName=sjcockell&hgS_otherUserSessionName=SuppaResults&position=chr4:155666711-155732349
ENSG00000164116.16;AF:chr4:155666828:155666965-155667346:155667198:155667220-155667346:+	-0.183179	0.0412088	ENSG00000164116	AF	2982	GUCY1A3	4	155666711	155732349	1	protein_coding	guanylate cyclase 1 soluble subunit alpha [Source:HGNC Symbol;Acc:HGNC:4685]	http://genome-euro.ucsc.edu/cgi-bin/hgTracks?hgS_doOtherUser=submit&hgS_otherUserName=sjcockell&hgS_otherUserSessionName=SuppaResults&position=chr4:155666711-155732349
ENSG00000164136.16;A3:chr4:141689035-141719366:141689035-141719378:+	0.301674	0.00599401	ENSG00000164136	A3	3600	IL15	4	141636599	141733987	1	protein_coding	interleukin 15 [Source:HGNC Symbol;Acc:HGNC:5977]	http://genome-euro.ucsc.edu/cgi-bin/hgTracks?hgS_doOtherUser=submit&hgS_otherUserName=sjcockell&hgS_otherUserSessionName=SuppaResults&position=chr4:141636599-141733987
ENSG00000164136.16;SE:chr4:141720566-141721059:141721177-141721924:+	-0.294217	0.00599401	ENSG00000164136	SE	3600	IL15	4	141636599	141733987	1	protein_coding	interleukin 15 [Source:HGNC Symbol;Acc:HGNC:5977]	http://genome-euro.ucsc.edu/cgi-bin/hgTracks?hgS_doOtherUser=submit&hgS_otherUserName=sjcockell&hgS_otherUserSessionName=SuppaResults&position=chr4:141636599-141733987
ENSG00000164181.13;SE:chr5:60787431-60799180:60799230-60844160:-	0.113495	0.0224775	ENSG00000164181	SE	79993	ELOVL7	5	60751791	60844389	-1	protein_coding	ELOVL fatty acid elongase 7 [Source:HGNC Symbol;Acc:HGNC:26292]	http://genome-euro.ucsc.edu/cgi-bin/hgTracks?hgS_doOtherUser=submit&hgS_otherUserName=sjcockell&hgS_otherUserSessionName=SuppaResults&position=chr5:60751791-60844389
ENSG00000164442.9;AF:chr6:139373952-139374132:139374213:139373952-139374264:139374362:-	0.104341	0.024975	ENSG00000164442	AF	10370	CITED2	6	139371807	139374620	-1	protein_coding	Cbp/p300 interacting transactivator with Glu/Asp rich carboxy-terminal domain 2 [Source:HGNC Symbol;Acc:HGNC:1987]	http://genome-euro.ucsc.edu/cgi-bin/hgTracks?hgS_doOtherUser=submit&hgS_otherUserName=sjcockell&hgS_otherUserSessionName=SuppaResults&position=chr6:139371807-139374620
ENSG00000164442.9;AF:chr6:139373952-139374264:139374362:139373952-139374413:139374620:-	-0.138885	0.024975	ENSG00000164442	AF	10370	CITED2	6	139371807	139374620	-1	protein_coding	Cbp/p300 interacting transactivator with Glu/Asp rich carboxy-terminal domain 2 [Source:HGNC Symbol;Acc:HGNC:1987]	http://genome-euro.ucsc.edu/cgi-bin/hgTracks?hgS_doOtherUser=submit&hgS_otherUserName=sjcockell&hgS_otherUserSessionName=SuppaResults&position=chr6:139371807-139374620
ENSG00000164543.5;AF:chr7:43582758:43582961-43595901:43583065:43583449-43595901:+	-0.185245	0.0164835	ENSG00000164543	AF	9263	STK17A	7	43582758	43626786	1	protein_coding	serine/threonine kinase 17a [Source:HGNC Symbol;Acc:HGNC:11395]	http://genome-euro.ucsc.edu/cgi-bin/hgTracks?hgS_doOtherUser=submit&hgS_otherUserName=sjcockell&hgS_otherUserSessionName=SuppaResults&position=chr7:43582758-43626786
ENSG00000164587.12;A5:chr5:150447735-150449486:150447735-150449492:-	0.118008	0.0384615	ENSG00000164587	A5	6208	RPS14	5	150443190	150449756	-1	protein_coding	ribosomal protein S14 [Source:HGNC Symbol;Acc:HGNC:10387]	http://genome-euro.ucsc.edu/cgi-bin/hgTracks?hgS_doOtherUser=submit&hgS_otherUserName=sjcockell&hgS_otherUserSessionName=SuppaResults&position=chr5:150443190-150449756
ENSG00000164919.10;AF:chr8:99892052-99893013:99893135:99892052-99893639:99893707:-	-0.336668	0	ENSG00000164919	AF	1345	COX6C	8	99873200	99894062	-1	protein_coding	cytochrome c oxidase subunit 6C [Source:HGNC Symbol;Acc:HGNC:2285]	http://genome-euro.ucsc.edu/cgi-bin/hgTracks?hgS_doOtherUser=submit&hgS_otherUserName=sjcockell&hgS_otherUserSessionName=SuppaResults&position=chr8:99873200-99894062
ENSG00000164919.10;AF:chr8:99892052-99893319:99893623:99892052-99893639:99893707:-	-0.307374	0.003996	ENSG00000164919	AF	1345	COX6C	8	99873200	99894062	-1	protein_coding	cytochrome c oxidase subunit 6C [Source:HGNC Symbol;Acc:HGNC:2285]	http://genome-euro.ucsc.edu/cgi-bin/hgTracks?hgS_doOtherUser=submit&hgS_otherUserName=sjcockell&hgS_otherUserSessionName=SuppaResults&position=chr8:99873200-99894062
ENSG00000164919.10;AF:chr8:99892052-99893443:99893622:99892052-99893639:99893707:-	-0.315592	0.003996	ENSG00000164919	AF	1345	COX6C	8	99873200	99894062	-1	protein_coding	cytochrome c oxidase subunit 6C [Source:HGNC Symbol;Acc:HGNC:2285]	http://genome-euro.ucsc.edu/cgi-bin/hgTracks?hgS_doOtherUser=submit&hgS_otherUserName=sjcockell&hgS_otherUserSessionName=SuppaResults&position=chr8:99873200-99894062
ENSG00000166228.8;AL:chr10:70882280:70882485-70885152:70883932:70884048-70885152:-	-0.131227	0.035964	ENSG00000166228	AL	5092	PCBD1	10	70882280	70888784	-1	protein_coding	pterin-4 alpha-carbinolamine dehydratase 1 [Source:HGNC Symbol;Acc:HGNC:8646]	http://genome-euro.ucsc.edu/cgi-bin/hgTracks?hgS_doOtherUser=submit&hgS_otherUserName=sjcockell&hgS_otherUserSessionName=SuppaResults&position=chr10:70882280-70888784
ENSG00000166387.11;AF:chr11:7513770:7514121-7549440:7538277:7538353-7549440:+	0.163458	0.035964	ENSG00000166387	AF	8495	PPFIBP2	11	7513298	7657127	1	protein_coding	PPFIA binding protein 2 [Source:HGNC Symbol;Acc:HGNC:9250]	http://genome-euro.ucsc.edu/cgi-bin/hgTracks?hgS_doOtherUser=submit&hgS_otherUserName=sjcockell&hgS_otherUserSessionName=SuppaResults&position=chr11:7513298-7657127
ENSG00000167106.11;AF:chr9:127953925-127963722:127963745:127953925-127979992:127980513:-	-0.123141	0.0284715	ENSG00000167106	AF	399665	FAM102A	9	127940579	127980513	-1	protein_coding	family with sequence similarity 102 member A [Source:HGNC Symbol;Acc:HGNC:31419]	http://genome-euro.ucsc.edu/cgi-bin/hgTracks?hgS_doOtherUser=submit&hgS_otherUserName=sjcockell&hgS_otherUserSessionName=SuppaResults&position=chr9:127940579-127980513
ENSG00000167751.12;AF:chr19:50861568:50861679-50873183:50870601:50870749-50873183:+	-0.200953	0.0314685	ENSG00000167751	AF	3817	KLK2	19	50861568	50880567	1	protein_coding	kallikrein related peptidase 2 [Source:HGNC Symbol;Acc:HGNC:6363]	http://genome-euro.ucsc.edu/cgi-bin/hgTracks?hgS_doOtherUser=submit&hgS_otherUserName=sjcockell&hgS_otherUserSessionName=SuppaResults&position=chr19:50861568-50880567
ENSG00000167751.12;AF:chr19:50873445:50873519-50876472:50875643:50875939-50876472:+	-0.470183	0	ENSG00000167751	AF	3817	KLK2	19	50861568	50880567	1	protein_coding	kallikrein related peptidase 2 [Source:HGNC Symbol;Acc:HGNC:6363]	http://genome-euro.ucsc.edu/cgi-bin/hgTracks?hgS_doOtherUser=submit&hgS_otherUserName=sjcockell&hgS_otherUserSessionName=SuppaResults&position=chr19:50861568-50880567
ENSG00000168216.10;A3:chr6:69700869-69701443:69700802-69701443:-	-0.117229	0.013986	ENSG00000168216	A3	55788	LMBRD1	6	69675802	69797111	-1	protein_coding	LMBR1 domain containing 1 [Source:HGNC Symbol;Acc:HGNC:23038]	http://genome-euro.ucsc.edu/cgi-bin/hgTracks?hgS_doOtherUser=submit&hgS_otherUserName=sjcockell&hgS_otherUserSessionName=SuppaResults&position=chr6:69675802-69797111
ENSG00000168439.16;AF:chr11:64185272:64185974-64193078:64186204:64186270-64193078:+	-0.135023	0.0494505	ENSG00000168439	AF	10963	STIP1	11	64185272	64204543	1	protein_coding	stress induced phosphoprotein 1 [Source:HGNC Symbol;Acc:HGNC:11387]	http://genome-euro.ucsc.edu/cgi-bin/hgTracks?hgS_doOtherUser=submit&hgS_otherUserName=sjcockell&hgS_otherUserSessionName=SuppaResults&position=chr11:64185272-64204543
ENSG00000168439.16;AF:chr11:64185272:64185974-64193078:64186225:64186270-64193078:+	-0.262289	0.0494505	ENSG00000168439	AF	10963	STIP1	11	64185272	64204543	1	protein_coding	stress induced phosphoprotein 1 [Source:HGNC Symbol;Acc:HGNC:11387]	http://genome-euro.ucsc.edu/cgi-bin/hgTracks?hgS_doOtherUser=submit&hgS_otherUserName=sjcockell&hgS_otherUserSessionName=SuppaResults&position=chr11:64185272-64204543
ENSG00000169045.17;AL:chr5:179618208:179618323-179620892:179619301:179619407-179620892:-	-0.619035	0	ENSG00000169045	AL	3187	HNRNPH1	5	179614178	179634784	-1	protein_coding	heterogeneous nuclear ribonucleoprotein H1 [Source:HGNC Symbol;Acc:HGNC:5041]	http://genome-euro.ucsc.edu/cgi-bin/hgTracks?hgS_doOtherUser=submit&hgS_otherUserName=sjcockell&hgS_otherUserSessionName=SuppaResults&position=chr5:179614178-179634784
ENSG00000169710.8;AF:chr17:82096447-82096787:82096841:82096447-82097258:82097324:-	0.328968	0.02997	ENSG00000169710	AF	2194	FASN	17	82078333	82098332	-1	protein_coding	fatty acid synthase [Source:HGNC Symbol;Acc:HGNC:3594]	http://genome-euro.ucsc.edu/cgi-bin/hgTracks?hgS_doOtherUser=submit&hgS_otherUserName=sjcockell&hgS_otherUserSessionName=SuppaResults&position=chr17:82078333-82098332
ENSG00000169710.8;AF:chr17:82096447-82096787:82096841:82096447-82098121:82098294:-	0.243152	0.02997	ENSG00000169710	AF	2194	FASN	17	82078333	82098332	-1	protein_coding	fatty acid synthase [Source:HGNC Symbol;Acc:HGNC:3594]	http://genome-euro.ucsc.edu/cgi-bin/hgTracks?hgS_doOtherUser=submit&hgS_otherUserName=sjcockell&hgS_otherUserSessionName=SuppaResults&position=chr17:82078333-82098332
ENSG00000170638.9;AF:chr22:50185915:50185976-50193027:50190598:50190648-50193027:+	0.167801	0.024975	ENSG00000170638	AF	80305	TRABD	22	50185915	50199598	1	protein_coding	TraB domain containing [Source:HGNC Symbol;Acc:HGNC:28805]	http://genome-euro.ucsc.edu/cgi-bin/hgTracks?hgS_doOtherUser=submit&hgS_otherUserName=sjcockell&hgS_otherUserSessionName=SuppaResults&position=chr22:50185915-50199598
ENSG00000171703.16;AF:chr20:64063144:64063384-64066476:64063481:64063949-64066476:+	-0.151492	0.0494505	ENSG00000171703	AF	6919	TCEA2	20	64049836	64072347	1	protein_coding	transcription elongation factor A2 [Source:HGNC Symbol;Acc:HGNC:11614]	http://genome-euro.ucsc.edu/cgi-bin/hgTracks?hgS_doOtherUser=submit&hgS_otherUserName=sjcockell&hgS_otherUserSessionName=SuppaResults&position=chr20:64049836-64072347
ENSG00000172840.6;AF:chr16:66878589:66878639-66884231:66880361:66880640-66884231:+	-0.141555	0.0302198	ENSG00000172840	AF	57546	PDP2	16	66878589	66895754	1	protein_coding	pyruvate dehyrogenase phosphatase catalytic subunit 2 [Source:HGNC Symbol;Acc:HGNC:30263]	http://genome-euro.ucsc.edu/cgi-bin/hgTracks?hgS_doOtherUser=submit&hgS_otherUserName=sjcockell&hgS_otherUserSessionName=SuppaResults&position=chr16:66878589-66895754
ENSG00000172840.6;AF:chr16:66878589:66878639-66884231:66880531:66880756-66884231:+	-0.366734	0.0302198	ENSG00000172840	AF	57546	PDP2	16	66878589	66895754	1	protein_coding	pyruvate dehyrogenase phosphatase catalytic subunit 2 [Source:HGNC Symbol;Acc:HGNC:30263]	http://genome-euro.ucsc.edu/cgi-bin/hgTracks?hgS_doOtherUser=submit&hgS_otherUserName=sjcockell&hgS_otherUserSessionName=SuppaResults&position=chr16:66878589-66895754
ENSG00000172840.6;AF:chr16:66878589:66878639-66884231:66880549:66880664-66884231:+	-0.341606	0.047619	ENSG00000172840	AF	57546	PDP2	16	66878589	66895754	1	protein_coding	pyruvate dehyrogenase phosphatase catalytic subunit 2 [Source:HGNC Symbol;Acc:HGNC:30263]	http://genome-euro.ucsc.edu/cgi-bin/hgTracks?hgS_doOtherUser=submit&hgS_otherUserName=sjcockell&hgS_otherUserSessionName=SuppaResults&position=chr16:66878589-66895754
ENSG00000173163.10;A3:chr2:62135979-62146298:62135979-62146319:+	0.517376	0.0104895	ENSG00000173163	A3	150684	COMMD1	2	61888724	62147247	1	protein_coding	copper metabolism domain containing 1 [Source:HGNC Symbol;Acc:HGNC:23024]	http://genome-euro.ucsc.edu/cgi-bin/hgTracks?hgS_doOtherUser=submit&hgS_otherUserName=sjcockell&hgS_otherUserSessionName=SuppaResults&position=chr2:61888724-62147247
ENSG00000173218.14;AF:chr1:115641953:115642086-115651277:115642629:115642706-115651277:+	0.183104	0.0314685	ENSG00000173218	AF	81839	VANGL1	1	115641953	115698224	1	protein_coding	VANGL planar cell polarity protein 1 [Source:HGNC Symbol;Acc:HGNC:15512]	http://genome-euro.ucsc.edu/cgi-bin/hgTracks?hgS_doOtherUser=submit&hgS_otherUserName=sjcockell&hgS_otherUserSessionName=SuppaResults&position=chr1:115641953-115698224
ENSG00000173418.11;SE:chr20:20017449-20022456:20022480-20025669:+	0.118209	0.026973	ENSG00000173418	SE	51126	NAA20	20	20017116	20033655	1	protein_coding	N(alpha)-acetyltransferase 20, NatB catalytic subunit [Source:HGNC Symbol;Acc:HGNC:15908]	http://genome-euro.ucsc.edu/cgi-bin/hgTracks?hgS_doOtherUser=submit&hgS_otherUserName=sjcockell&hgS_otherUserSessionName=SuppaResults&position=chr20:20017116-20033655
ENSG00000174444.14;AL:chr15:66501399:66501504-66502612:66501785:66501873-66502612:-	-0.103138	0	ENSG00000174444	AL	6124	RPL4	15	66498015	66524532	-1	protein_coding	ribosomal protein L4 [Source:HGNC Symbol;Acc:HGNC:10353]	http://genome-euro.ucsc.edu/cgi-bin/hgTracks?hgS_doOtherUser=submit&hgS_otherUserName=sjcockell&hgS_otherUserSessionName=SuppaResults&position=chr15:66498015-66524532
ENSG00000174953.13;AF:chr3:154316163-154319081:154319284:154316163-154324174:154324251:-	-0.150293	0.04662	ENSG00000174953	AF	170506	DHX36	3	154272546	154324497	-1	protein_coding	DEAH-box helicase 36 [Source:HGNC Symbol;Acc:HGNC:14410]	http://genome-euro.ucsc.edu/cgi-bin/hgTracks?hgS_doOtherUser=submit&hgS_otherUserName=sjcockell&hgS_otherUserSessionName=SuppaResults&position=chr3:154272546-154324497
ENSG00000175548.8;A5:chr12:38317064-38318261:38317038-38318261:+	0.187133	0.024975	ENSG00000175548	A5	144245	ALG10B	12	38316578	38329728	1	protein_coding	ALG10B, alpha-1,2-glucosyltransferase [Source:HGNC Symbol;Acc:HGNC:31088]	http://genome-euro.ucsc.edu/cgi-bin/hgTracks?hgS_doOtherUser=submit&hgS_otherUserName=sjcockell&hgS_otherUserSessionName=SuppaResults&position=chr12:38316578-38329728
ENSG00000175548.8;AL:chr12:38318458-38320161:38321327:38318458-38323913:38323982:+	-0.301046	0.024975	ENSG00000175548	AL	144245	ALG10B	12	38316578	38329728	1	protein_coding	ALG10B, alpha-1,2-glucosyltransferase [Source:HGNC Symbol;Acc:HGNC:31088]	http://genome-euro.ucsc.edu/cgi-bin/hgTracks?hgS_doOtherUser=submit&hgS_otherUserName=sjcockell&hgS_otherUserSessionName=SuppaResults&position=chr12:38316578-38329728
ENSG00000175866.15;AL:chr17:81108509-81108968:81109238:81108509-81115770:81116225:+	0.188694	0.0217283	ENSG00000175866	AL	10458	BAIAP2	17	81035122	81117432	1	protein_coding	BAI1 associated protein 2 [Source:HGNC Symbol;Acc:HGNC:947]	http://genome-euro.ucsc.edu/cgi-bin/hgTracks?hgS_doOtherUser=submit&hgS_otherUserName=sjcockell&hgS_otherUserSessionName=SuppaResults&position=chr17:81035122-81117432
ENSG00000175866.15;SE:chr17:81108509-81110914:81110955-81115770:+	0.139883	0.028971	ENSG00000175866	SE	10458	BAIAP2	17	81035122	81117432	1	protein_coding	BAI1 associated protein 2 [Source:HGNC Symbol;Acc:HGNC:947]	http://genome-euro.ucsc.edu/cgi-bin/hgTracks?hgS_doOtherUser=submit&hgS_otherUserName=sjcockell&hgS_otherUserSessionName=SuppaResults&position=chr17:81035122-81117432
ENSG00000175866.15;SE:chr17:81108509-81110914:81110959-81115770:+	0.310655	0	ENSG00000175866	SE	10458	BAIAP2	17	81035122	81117432	1	protein_coding	BAI1 associated protein 2 [Source:HGNC Symbol;Acc:HGNC:947]	http://genome-euro.ucsc.edu/cgi-bin/hgTracks?hgS_doOtherUser=submit&hgS_otherUserName=sjcockell&hgS_otherUserSessionName=SuppaResults&position=chr17:81035122-81117432
ENSG00000176058.12;AF:chr9:137192691-137198987:137200105:137192691-137204104:137204193:-	-0.11302	0.0412088	ENSG00000176058	AF	286262	TPRN	9	137191617	137204193	-1	protein_coding	taperin [Source:HGNC Symbol;Acc:HGNC:26894]	http://genome-euro.ucsc.edu/cgi-bin/hgTracks?hgS_doOtherUser=submit&hgS_otherUserName=sjcockell&hgS_otherUserSessionName=SuppaResults&position=chr9:137191617-137204193
ENSG00000176058.12;AF:chr9:137192691-137198987:137200741:137192691-137204104:137204193:-	-0.163793	0.0412088	ENSG00000176058	AF	286262	TPRN	9	137191617	137204193	-1	protein_coding	taperin [Source:HGNC Symbol;Acc:HGNC:26894]	http://genome-euro.ucsc.edu/cgi-bin/hgTracks?hgS_doOtherUser=submit&hgS_otherUserName=sjcockell&hgS_otherUserSessionName=SuppaResults&position=chr9:137191617-137204193
ENSG00000176444.18;AF:chr1:155270977-155273201:155273329:155270977-155278375:155278491:-	-0.116062	0.047952	ENSG00000176444	AF	1196	CLK2	1	155262868	155278491	-1	protein_coding	CDC like kinase 2 [Source:HGNC Symbol;Acc:HGNC:2069]	http://genome-euro.ucsc.edu/cgi-bin/hgTracks?hgS_doOtherUser=submit&hgS_otherUserName=sjcockell&hgS_otherUserSessionName=SuppaResults&position=chr1:155262868-155278491
ENSG00000176444.18;SE:chr1:155268359-155268708:155268792-155269488:-	0.115804	0.045954	ENSG00000176444	SE	1196	CLK2	1	155262868	155278491	-1	protein_coding	CDC like kinase 2 [Source:HGNC Symbol;Acc:HGNC:2069]	http://genome-euro.ucsc.edu/cgi-bin/hgTracks?hgS_doOtherUser=submit&hgS_otherUserName=sjcockell&hgS_otherUserSessionName=SuppaResults&position=chr1:155262868-155278491
ENSG00000176444.18;SE:chr1:155268359-155268708:155268795-155269488:-	0.121425	0.045954	ENSG00000176444	SE	1196	CLK2	1	155262868	155278491	-1	protein_coding	CDC like kinase 2 [Source:HGNC Symbol;Acc:HGNC:2069]	http://genome-euro.ucsc.edu/cgi-bin/hgTracks?hgS_doOtherUser=submit&hgS_otherUserName=sjcockell&hgS_otherUserSessionName=SuppaResults&position=chr1:155262868-155278491
ENSG00000177054.13;SE:chr11:19117276-19142978:19143123-19146181:+	0.176473	0.020979	ENSG00000177054	SE	54503	ZDHHC13	11	19117099	19176422	1	protein_coding	zinc finger DHHC-type containing 13 [Source:HGNC Symbol;Acc:HGNC:18413]	http://genome-euro.ucsc.edu/cgi-bin/hgTracks?hgS_doOtherUser=submit&hgS_otherUserName=sjcockell&hgS_otherUserSessionName=SuppaResults&position=chr11:19117099-19176422
ENSG00000177694.15;AF:chr3:174859280:174859450-175096790:174863816:174864090-175096790:+	0.200284	0.032967	ENSG00000177694	AF	254827	NAALADL2	3	174438573	175810552	1	protein_coding	N-acetylated alpha-linked acidic dipeptidase like 2 [Source:HGNC Symbol;Acc:HGNC:23219]	http://genome-euro.ucsc.edu/cgi-bin/hgTracks?hgS_doOtherUser=submit&hgS_otherUserName=sjcockell&hgS_otherUserSessionName=SuppaResults&position=chr3:174438573-175810552
ENSG00000177854.7;A5:chrX:153972886-153981850:153972860-153981850:+	0.175156	0.00599401	ENSG00000177854	A5	8269	TMEM187	X	153972327	153983195	1	protein_coding	transmembrane protein 187 [Source:HGNC Symbol;Acc:HGNC:13705]	http://genome-euro.ucsc.edu/cgi-bin/hgTracks?hgS_doOtherUser=submit&hgS_otherUserName=sjcockell&hgS_otherUserSessionName=SuppaResults&position=chrX:153972327-153983195
ENSG00000177854.7;AF:chrX:153972327:153972860-153981850:153980606:153980623-153981850:+	0.144898	0.00849151	ENSG00000177854	AF	8269	TMEM187	X	153972327	153983195	1	protein_coding	transmembrane protein 187 [Source:HGNC Symbol;Acc:HGNC:13705]	http://genome-euro.ucsc.edu/cgi-bin/hgTracks?hgS_doOtherUser=submit&hgS_otherUserName=sjcockell&hgS_otherUserSessionName=SuppaResults&position=chrX:153972327-153983195
ENSG00000177854.7;AF:chrX:153972858:153972886-153981850:153980606:153980623-153981850:+	0.522886	0.002997	ENSG00000177854	AF	8269	TMEM187	X	153972327	153983195	1	protein_coding	transmembrane protein 187 [Source:HGNC Symbol;Acc:HGNC:13705]	http://genome-euro.ucsc.edu/cgi-bin/hgTracks?hgS_doOtherUser=submit&hgS_otherUserName=sjcockell&hgS_otherUserSessionName=SuppaResults&position=chrX:153972327-153983195
ENSG00000178719.16;A3:chr8:143991804-143991878:143991804-143992245:+	-0.379727	0.00549451	ENSG00000178719	A3	2907	GRINA	8	143990058	143993415	1	protein_coding	glutamate ionotropic receptor NMDA type subunit associated protein 1 [Source:HGNC Symbol;Acc:HGNC:4589]	http://genome-euro.ucsc.edu/cgi-bin/hgTracks?hgS_doOtherUser=submit&hgS_otherUserName=sjcockell&hgS_otherUserSessionName=SuppaResults&position=chr8:143990058-143993415
ENSG00000178719.16;RI:chr8:143991692:143991804-143992245:143992373:+	-0.461564	0.014652	ENSG00000178719	RI	2907	GRINA	8	143990058	143993415	1	protein_coding	glutamate ionotropic receptor NMDA type subunit associated protein 1 [Source:HGNC Symbol;Acc:HGNC:4589]	http://genome-euro.ucsc.edu/cgi-bin/hgTracks?hgS_doOtherUser=submit&hgS_otherUserName=sjcockell&hgS_otherUserSessionName=SuppaResults&position=chr8:143990058-143993415
ENSG00000178719.16;SE:chr8:143991804-143991878:143991949-143992245:+	-0.119469	0.00549451	ENSG00000178719	SE	2907	GRINA	8	143990058	143993415	1	protein_coding	glutamate ionotropic receptor NMDA type subunit associated protein 1 [Source:HGNC Symbol;Acc:HGNC:4589]	http://genome-euro.ucsc.edu/cgi-bin/hgTracks?hgS_doOtherUser=submit&hgS_otherUserName=sjcockell&hgS_otherUserSessionName=SuppaResults&position=chr8:143990058-143993415
ENSG00000178999.12;SE:chr17:8207840-8210177:8210249-8210530:-	0.120116	0.041958	ENSG00000178999	SE	9212	AURKB	17	8204733	8210600	-1	protein_coding	aurora kinase B [Source:HGNC Symbol;Acc:HGNC:11390]	http://genome-euro.ucsc.edu/cgi-bin/hgTracks?hgS_doOtherUser=submit&hgS_otherUserName=sjcockell&hgS_otherUserSessionName=SuppaResults&position=chr17:8204733-8210600
ENSG00000179820.15;A3:chr19:53867943-53869690:53867943-53869754:+	0.10954	0.047952	ENSG00000179820	A3	91663	MYADM	19	53866223	53876437	1	protein_coding	myeloid associated differentiation marker [Source:HGNC Symbol;Acc:HGNC:7544]	http://genome-euro.ucsc.edu/cgi-bin/hgTracks?hgS_doOtherUser=submit&hgS_otherUserName=sjcockell&hgS_otherUserSessionName=SuppaResults&position=chr19:53866223-53876437
ENSG00000180806.4;AF:chr12:53994895:53995016-54002430:54000119:54000726-54002430:+	-0.245251	0.0194805	ENSG00000180806	AF	3225	HOXC9	12	53994895	54003337	1	protein_coding	homeobox C9 [Source:HGNC Symbol;Acc:HGNC:5130]	http://genome-euro.ucsc.edu/cgi-bin/hgTracks?hgS_doOtherUser=submit&hgS_otherUserName=sjcockell&hgS_otherUserSessionName=SuppaResults&position=chr12:53994895-54003337
ENSG00000180900.18;SE:chr8:143807013-143807552:143807614-143808609:-	-0.232618	0	ENSG00000180900	SE	23513	SCRIB	8	143790920	143815379	-1	protein_coding	scribbled planar cell polarity protein [Source:HGNC Symbol;Acc:HGNC:30377]	http://genome-euro.ucsc.edu/cgi-bin/hgTracks?hgS_doOtherUser=submit&hgS_otherUserName=sjcockell&hgS_otherUserSessionName=SuppaResults&position=chr8:143790920-143815379
ENSG00000181264.8;A3:chr11:120325368-120327122:120325368-120327441:+	-0.17303	0.035964	ENSG00000181264	A3	219902	TMEM136	11	120325129	120333682	1	protein_coding	transmembrane protein 136 [Source:HGNC Symbol;Acc:HGNC:28280]	http://genome-euro.ucsc.edu/cgi-bin/hgTracks?hgS_doOtherUser=submit&hgS_otherUserName=sjcockell&hgS_otherUserSessionName=SuppaResults&position=chr11:120325129-120333682
ENSG00000182473.21;A3:chr17:76090481-76091143:76090397-76091143:-	0.181125	0.02997	ENSG00000182473	A3	23265	EXOC7	17	76081017	76121576	-1	protein_coding	exocyst complex component 7 [Source:HGNC Symbol;Acc:HGNC:23214]	http://genome-euro.ucsc.edu/cgi-bin/hgTracks?hgS_doOtherUser=submit&hgS_otherUserName=sjcockell&hgS_otherUserSessionName=SuppaResults&position=chr17:76081017-76121576
ENSG00000182473.21;MX:chr17:76089320-76090329:76090397-76094414:76089320-76091143:76091235-76094414:-	0.290373	0	ENSG00000182473	MX	23265	EXOC7	17	76081017	76121576	-1	protein_coding	exocyst complex component 7 [Source:HGNC Symbol;Acc:HGNC:23214]	http://genome-euro.ucsc.edu/cgi-bin/hgTracks?hgS_doOtherUser=submit&hgS_otherUserName=sjcockell&hgS_otherUserSessionName=SuppaResults&position=chr17:76081017-76121576
ENSG00000182473.21;SE:chr17:76089320-76090329:76090397-76091143:-	-0.154564	0.0044955	ENSG00000182473	SE	23265	EXOC7	17	76081017	76121576	-1	protein_coding	exocyst complex component 7 [Source:HGNC Symbol;Acc:HGNC:23214]	http://genome-euro.ucsc.edu/cgi-bin/hgTracks?hgS_doOtherUser=submit&hgS_otherUserName=sjcockell&hgS_otherUserSessionName=SuppaResults&position=chr17:76081017-76121576
ENSG00000182473.21;SE:chr17:76089320-76090329:76090397-76094414:-	0.33042	0	ENSG00000182473	SE	23265	EXOC7	17	76081017	76121576	-1	protein_coding	exocyst complex component 7 [Source:HGNC Symbol;Acc:HGNC:23214]	http://genome-euro.ucsc.edu/cgi-bin/hgTracks?hgS_doOtherUser=submit&hgS_otherUserName=sjcockell&hgS_otherUserSessionName=SuppaResults&position=chr17:76081017-76121576
ENSG00000182473.21;SE:chr17:76090397-76091143:76091235-76094414:-	-0.55609	0	ENSG00000182473	SE	23265	EXOC7	17	76081017	76121576	-1	protein_coding	exocyst complex component 7 [Source:HGNC Symbol;Acc:HGNC:23214]	http://genome-euro.ucsc.edu/cgi-bin/hgTracks?hgS_doOtherUser=submit&hgS_otherUserName=sjcockell&hgS_otherUserSessionName=SuppaResults&position=chr17:76081017-76121576
ENSG00000182541.17;AF:chr22:31212274:31212424-31258291:31248487:31248769-31258291:+	0.324912	0.045954	ENSG00000182541	AF	3985	LIMK2	22	31212239	31280080	1	protein_coding	LIM domain kinase 2 [Source:HGNC Symbol;Acc:HGNC:6614]	http://genome-euro.ucsc.edu/cgi-bin/hgTracks?hgS_doOtherUser=submit&hgS_otherUserName=sjcockell&hgS_otherUserSessionName=SuppaResults&position=chr22:31212239-31280080
ENSG00000182541.17;AL:chr22:31275308-31276789:31277638:31275308-31278297:31279734:+	-0.140646	0.045954	ENSG00000182541	AL	3985	LIMK2	22	31212239	31280080	1	protein_coding	LIM domain kinase 2 [Source:HGNC Symbol;Acc:HGNC:6614]	http://genome-euro.ucsc.edu/cgi-bin/hgTracks?hgS_doOtherUser=submit&hgS_otherUserName=sjcockell&hgS_otherUserSessionName=SuppaResults&position=chr22:31212239-31280080
ENSG00000183011.13;AF:chr17:7857198-7857383:7857891:7857198-7857894:7858079:-	-0.164779	0.0014985	ENSG00000183011	AF	84316	NAA38	17	7856685	7885238	-1	protein_coding	N(alpha)-acetyltransferase 38, NatC auxiliary subunit [Source:HGNC Symbol;Acc:HGNC:28212]	http://genome-euro.ucsc.edu/cgi-bin/hgTracks?hgS_doOtherUser=submit&hgS_otherUserName=sjcockell&hgS_otherUserSessionName=SuppaResults&position=chr17:7856685-7885238
ENSG00000183751.14;A3:chr16:1974107-1974181:1974107-1974197:+	0.308024	0.041958	ENSG00000183751	A3	NA	TBL3	16	1972037	1982933	1	protein_coding	transducin beta like 3 [Source:HGNC Symbol;Acc:HGNC:11587]	http://genome-euro.ucsc.edu/cgi-bin/hgTracks?hgS_doOtherUser=submit&hgS_otherUserName=sjcockell&hgS_otherUserSessionName=SuppaResults&position=chr16:1972037-1982933
ENSG00000183751.14;RI:chr16:1974056:1974107-1974181:1974292:+	-0.13905	0.0454545	ENSG00000183751	RI	NA	TBL3	16	1972037	1982933	1	protein_coding	transducin beta like 3 [Source:HGNC Symbol;Acc:HGNC:11587]	http://genome-euro.ucsc.edu/cgi-bin/hgTracks?hgS_doOtherUser=submit&hgS_otherUserName=sjcockell&hgS_otherUserSessionName=SuppaResults&position=chr16:1972037-1982933
ENSG00000183955.12;AF:chr12:123384166:123384208-123390630:123390042:123390150-123390630:+	0.137788	0.01998	ENSG00000183955	AF	387893	KMT5A	12	123383773	123409358	1	protein_coding	lysine methyltransferase 5A [Source:HGNC Symbol;Acc:HGNC:29489]	http://genome-euro.ucsc.edu/cgi-bin/hgTracks?hgS_doOtherUser=submit&hgS_otherUserName=sjcockell&hgS_otherUserSessionName=SuppaResults&position=chr12:123383773-123409358
ENSG00000185885.15;AF:chr11:313853:314356-314922:314418:314456-314922:+	-0.283608	0.0024975	ENSG00000185885	AF	8519	IFITM1	11	313506	315272	1	protein_coding	interferon induced transmembrane protein 1 [Source:HGNC Symbol;Acc:HGNC:5412]	http://genome-euro.ucsc.edu/cgi-bin/hgTracks?hgS_doOtherUser=submit&hgS_otherUserName=sjcockell&hgS_otherUserSessionName=SuppaResults&position=chr11:313506-315272
ENSG00000186395.7;A5:chr17:40818482-40818767:40818482-40818787:-	0.364348	0	ENSG00000186395	A5	3858	KRT10	17	40818117	40822595	-1	protein_coding	keratin 10 [Source:HGNC Symbol;Acc:HGNC:6413]	http://genome-euro.ucsc.edu/cgi-bin/hgTracks?hgS_doOtherUser=submit&hgS_otherUserName=sjcockell&hgS_otherUserSessionName=SuppaResults&position=chr17:40818117-40822595
ENSG00000186575.17;SE:chr22:29636876-29639090:29639212-29642202:+	-0.176202	0.0244755	ENSG00000186575	SE	4771	NF2	22	29603556	29698598	1	protein_coding	neurofibromin 2 [Source:HGNC Symbol;Acc:HGNC:7773]	http://genome-euro.ucsc.edu/cgi-bin/hgTracks?hgS_doOtherUser=submit&hgS_otherUserName=sjcockell&hgS_otherUserSessionName=SuppaResults&position=chr22:29603556-29698598
ENSG00000186575.17;SE:chr22:29681601-29683020:29683064-29694752:+	0.211449	0.013986	ENSG00000186575	SE	4771	NF2	22	29603556	29698598	1	protein_coding	neurofibromin 2 [Source:HGNC Symbol;Acc:HGNC:7773]	http://genome-euro.ucsc.edu/cgi-bin/hgTracks?hgS_doOtherUser=submit&hgS_otherUserName=sjcockell&hgS_otherUserSessionName=SuppaResults&position=chr22:29603556-29698598
ENSG00000187109.13;AF:chr12:76074239-76083833:76084094:76074239-76084567:76084685:-	-0.191965	0.0184815	ENSG00000187109	AF	4673	NAP1L1	12	76036587	76085033	-1	protein_coding	nucleosome assembly protein 1 like 1 [Source:HGNC Symbol;Acc:HGNC:7637]	http://genome-euro.ucsc.edu/cgi-bin/hgTracks?hgS_doOtherUser=submit&hgS_otherUserName=sjcockell&hgS_otherUserSessionName=SuppaResults&position=chr12:76036587-76085033
ENSG00000187446.11;MX:chr15:41262883-41270557:41270618-41279336:41262883-41278767:41278889-41279336:+	0.218387	0.041958	ENSG00000187446	MX	11261	CHP1	15	41230839	41281890	1	protein_coding	calcineurin like EF-hand protein 1 [Source:HGNC Symbol;Acc:HGNC:17433]	http://genome-euro.ucsc.edu/cgi-bin/hgTracks?hgS_doOtherUser=submit&hgS_otherUserName=sjcockell&hgS_otherUserSessionName=SuppaResults&position=chr15:41230839-41281890
ENSG00000188690.12;AL:chr10:125788578:125789005-125794880:125791520:125794388-125794880:-	0.202522	0.00324675	ENSG00000188690	AL	7390	UROS	10	125784980	125823248	-1	protein_coding	uroporphyrinogen III synthase [Source:HGNC Symbol;Acc:HGNC:12592]	http://genome-euro.ucsc.edu/cgi-bin/hgTracks?hgS_doOtherUser=submit&hgS_otherUserName=sjcockell&hgS_otherUserSessionName=SuppaResults&position=chr10:125784980-125823248
ENSG00000188690.12;AL:chr10:125788583:125789005-125794880:125791520:125794388-125794880:-	0.408753	0.00324675	ENSG00000188690	AL	7390	UROS	10	125784980	125823248	-1	protein_coding	uroporphyrinogen III synthase [Source:HGNC Symbol;Acc:HGNC:12592]	http://genome-euro.ucsc.edu/cgi-bin/hgTracks?hgS_doOtherUser=submit&hgS_otherUserName=sjcockell&hgS_otherUserSessionName=SuppaResults&position=chr10:125784980-125823248
ENSG00000188739.14;AL:chr1:235154881:235155112-235160511:235160195:235160248-235160511:-	0.188429	0.032967	ENSG00000188739	AL	23029	RBM34	1	235131183	235161457	-1	protein_coding	RNA binding motif protein 34 [Source:HGNC Symbol;Acc:HGNC:28965]	http://genome-euro.ucsc.edu/cgi-bin/hgTracks?hgS_doOtherUser=submit&hgS_otherUserName=sjcockell&hgS_otherUserSessionName=SuppaResults&position=chr1:235131183-235161457
ENSG00000189120.4;AF:chr17:47848486-47850919:47851193:47848486-47855654:47855874:-	0.199619	0.0499501	ENSG00000189120	AF	80320	SP6	17	47844908	47855874	-1	protein_coding	Sp6 transcription factor [Source:HGNC Symbol;Acc:HGNC:14530]	http://genome-euro.ucsc.edu/cgi-bin/hgTracks?hgS_doOtherUser=submit&hgS_otherUserName=sjcockell&hgS_otherUserSessionName=SuppaResults&position=chr17:47844908-47855874
ENSG00000196151.10;AF:chr2:159283093-159286428:159286552:159283093-159286583:159286799:-	-0.410104	0.0314685	ENSG00000196151	AF	151525	WDSUB1	2	159235793	159286799	-1	protein_coding	WD repeat, sterile alpha motif and U-box domain containing 1 [Source:HGNC Symbol;Acc:HGNC:26697]	http://genome-euro.ucsc.edu/cgi-bin/hgTracks?hgS_doOtherUser=submit&hgS_otherUserName=sjcockell&hgS_otherUserSessionName=SuppaResults&position=chr2:159235793-159286799
ENSG00000196208.13;AF:chr2:11534116:11534254-11556454:11539843:11540108-11556454:+	0.408807	0.037962	ENSG00000196208	AF	9687	GREB1	2	11482341	11642788	1	protein_coding	growth regulation by estrogen in breast cancer 1 [Source:HGNC Symbol;Acc:HGNC:24885]	http://genome-euro.ucsc.edu/cgi-bin/hgTracks?hgS_doOtherUser=submit&hgS_otherUserName=sjcockell&hgS_otherUserSessionName=SuppaResults&position=chr2:11482341-11642788
ENSG00000196235.13;SE:chr19:39457740-39458294:39458305-39458818:+	0.150381	0.00499501	ENSG00000196235	SE	6829	SUPT5H	19	39436156	39476670	1	protein_coding	SPT5 homolog, DSIF elongation factor subunit [Source:HGNC Symbol;Acc:HGNC:11469]	http://genome-euro.ucsc.edu/cgi-bin/hgTracks?hgS_doOtherUser=submit&hgS_otherUserName=sjcockell&hgS_otherUserSessionName=SuppaResults&position=chr19:39436156-39476670
ENSG00000196419.12;AF:chr22:41621285:41621345-41621990:41621461:41621591-41621990:+	-0.204063	0.002997	ENSG00000196419	AF	2547	XRCC6	22	41621119	41664048	1	protein_coding	X-ray repair cross complementing 6 [Source:HGNC Symbol;Acc:HGNC:4055]	http://genome-euro.ucsc.edu/cgi-bin/hgTracks?hgS_doOtherUser=submit&hgS_otherUserName=sjcockell&hgS_otherUserSessionName=SuppaResults&position=chr22:41621119-41664048
ENSG00000196419.12;AF:chr22:41621295:41621345-41621990:41621461:41621591-41621990:+	0.117932	0.0044955	ENSG00000196419	AF	2547	XRCC6	22	41621119	41664048	1	protein_coding	X-ray repair cross complementing 6 [Source:HGNC Symbol;Acc:HGNC:4055]	http://genome-euro.ucsc.edu/cgi-bin/hgTracks?hgS_doOtherUser=submit&hgS_otherUserName=sjcockell&hgS_otherUserSessionName=SuppaResults&position=chr22:41621119-41664048
ENSG00000196586.13;A5:chr6:75892693-75894814:75892690-75894814:+	0.118885	0.0124875	ENSG00000196586	A5	4646	MYO6	6	75749192	75919537	1	protein_coding	myosin VI [Source:HGNC Symbol;Acc:HGNC:7605]	http://genome-euro.ucsc.edu/cgi-bin/hgTracks?hgS_doOtherUser=submit&hgS_otherUserName=sjcockell&hgS_otherUserSessionName=SuppaResults&position=chr6:75749192-75919537
ENSG00000196586.13;SE:chr6:75892690-75894814:75894840-75895231:+	-0.314717	0	ENSG00000196586	SE	4646	MYO6	6	75749192	75919537	1	protein_coding	myosin VI [Source:HGNC Symbol;Acc:HGNC:7605]	http://genome-euro.ucsc.edu/cgi-bin/hgTracks?hgS_doOtherUser=submit&hgS_otherUserName=sjcockell&hgS_otherUserSessionName=SuppaResults&position=chr6:75749192-75919537
ENSG00000196586.13;SE:chr6:75895260-75898373:75898411-75907605:+	0.108044	0.0112388	ENSG00000196586	SE	4646	MYO6	6	75749192	75919537	1	protein_coding	myosin VI [Source:HGNC Symbol;Acc:HGNC:7605]	http://genome-euro.ucsc.edu/cgi-bin/hgTracks?hgS_doOtherUser=submit&hgS_otherUserName=sjcockell&hgS_otherUserSessionName=SuppaResults&position=chr6:75749192-75919537
ENSG00000196653.11;SE:chr3:44712744-44714591:44714688-44720203:+	0.322348	0.033966	ENSG00000196653	SE	91392	ZNF502	3	44712643	44723831	1	protein_coding	zinc finger protein 502 [Source:HGNC Symbol;Acc:HGNC:23718]	http://genome-euro.ucsc.edu/cgi-bin/hgTracks?hgS_doOtherUser=submit&hgS_otherUserName=sjcockell&hgS_otherUserSessionName=SuppaResults&position=chr3:44712643-44723831
ENSG00000196776.15;AF:chr3:108080344-108090863:108091025:108080344-108091737:108091862:-	-0.227211	0.00749251	ENSG00000196776	AF	961	CD47	3	108043298	108091025	-1	protein_coding	CD47 molecule [Source:HGNC Symbol;Acc:HGNC:1682]	http://genome-euro.ucsc.edu/cgi-bin/hgTracks?hgS_doOtherUser=submit&hgS_otherUserName=sjcockell&hgS_otherUserSessionName=SuppaResults&position=chr3:108043298-108091025
ENSG00000196776.15;SE:chr3:108047292-108050578:108050602-108051939:-	0.18134	0.00749251	ENSG00000196776	SE	961	CD47	3	108043298	108091025	-1	protein_coding	CD47 molecule [Source:HGNC Symbol;Acc:HGNC:1682]	http://genome-euro.ucsc.edu/cgi-bin/hgTracks?hgS_doOtherUser=submit&hgS_otherUserName=sjcockell&hgS_otherUserSessionName=SuppaResults&position=chr3:108043298-108091025
ENSG00000197119.12;SE:chr14:100293377-100298842:100298885-100306199:-	0.258592	0.047952	ENSG00000197119	SE	123096	SLC25A29	14	100291111	100306547	-1	protein_coding	solute carrier family 25 member 29 [Source:HGNC Symbol;Acc:HGNC:20116]	http://genome-euro.ucsc.edu/cgi-bin/hgTracks?hgS_doOtherUser=submit&hgS_otherUserName=sjcockell&hgS_otherUserSessionName=SuppaResults&position=chr14:100291111-100306547
ENSG00000197498.12;SE:chr6:110985138-110988988:110989065-110991747:+	-0.196989	0.0112388	ENSG00000197498	SE	84154	RPF2	6	110982015	111028263	1	protein_coding	ribosome production factor 2 homolog [Source:HGNC Symbol;Acc:HGNC:20870]	http://genome-euro.ucsc.edu/cgi-bin/hgTracks?hgS_doOtherUser=submit&hgS_otherUserName=sjcockell&hgS_otherUserSessionName=SuppaResults&position=chr6:110982015-111028263
ENSG00000198081.10;AF:chr18:5294001-5294801:5294824:5294001-5295652:5295702:-	0.175606	0.0402098	ENSG00000198081	AF	7541	ZBTB14	18	5289019	5297053	-1	protein_coding	zinc finger and BTB domain containing 14 [Source:HGNC Symbol;Acc:HGNC:12860]	http://genome-euro.ucsc.edu/cgi-bin/hgTracks?hgS_doOtherUser=submit&hgS_otherUserName=sjcockell&hgS_otherUserSessionName=SuppaResults&position=chr18:5289019-5297053
ENSG00000198081.10;AF:chr18:5294001-5294801:5294824:5294001-5297012:5297053:-	-0.240338	0.0402098	ENSG00000198081	AF	7541	ZBTB14	18	5289019	5297053	-1	protein_coding	zinc finger and BTB domain containing 14 [Source:HGNC Symbol;Acc:HGNC:12860]	http://genome-euro.ucsc.edu/cgi-bin/hgTracks?hgS_doOtherUser=submit&hgS_otherUserName=sjcockell&hgS_otherUserSessionName=SuppaResults&position=chr18:5289019-5297053
ENSG00000198081.10;AF:chr18:5294001-5295652:5295702:5294001-5295813:5296040:-	-0.187634	0.0402098	ENSG00000198081	AF	7541	ZBTB14	18	5289019	5297053	-1	protein_coding	zinc finger and BTB domain containing 14 [Source:HGNC Symbol;Acc:HGNC:12860]	http://genome-euro.ucsc.edu/cgi-bin/hgTracks?hgS_doOtherUser=submit&hgS_otherUserName=sjcockell&hgS_otherUserSessionName=SuppaResults&position=chr18:5289019-5297053
ENSG00000198081.10;AF:chr18:5294001-5295652:5295702:5294001-5297012:5297053:-	-0.364894	0.0034965	ENSG00000198081	AF	7541	ZBTB14	18	5289019	5297053	-1	protein_coding	zinc finger and BTB domain containing 14 [Source:HGNC Symbol;Acc:HGNC:12860]	http://genome-euro.ucsc.edu/cgi-bin/hgTracks?hgS_doOtherUser=submit&hgS_otherUserName=sjcockell&hgS_otherUserSessionName=SuppaResults&position=chr18:5289019-5297053
ENSG00000198157.10;SE:chrX:81118485-81118730:81118759-81121535:-	0.165426	0.023976	ENSG00000198157	SE	79366	HMGN5	X	81113701	81201942	-1	protein_coding	high mobility group nucleosome binding domain 5 [Source:HGNC Symbol;Acc:HGNC:8013]	http://genome-euro.ucsc.edu/cgi-bin/hgTracks?hgS_doOtherUser=submit&hgS_otherUserName=sjcockell&hgS_otherUserSessionName=SuppaResults&position=chrX:81113701-81201942
ENSG00000198242.13;AF:chr17:28719393:28720030-28720707:28720244:28720430-28720707:+	-0.114388	0.01998	ENSG00000198242	AF	6147	RPL23A	17	28719393	28724359	1	protein_coding	ribosomal protein L23a [Source:HGNC Symbol;Acc:HGNC:10317]	http://genome-euro.ucsc.edu/cgi-bin/hgTracks?hgS_doOtherUser=submit&hgS_otherUserName=sjcockell&hgS_otherUserSessionName=SuppaResults&position=chr17:28719393-28724359
ENSG00000198380.12;SE:chr2:69350183-69354259:69354312-69354489:-	-0.120887	0.027972	ENSG00000198380	SE	2673	GFPT1	2	69319769	69387254	-1	protein_coding	glutamine--fructose-6-phosphate transaminase 1 [Source:HGNC Symbol;Acc:HGNC:4241]	http://genome-euro.ucsc.edu/cgi-bin/hgTracks?hgS_doOtherUser=submit&hgS_otherUserName=sjcockell&hgS_otherUserSessionName=SuppaResults&position=chr2:69319769-69387254
ENSG00000198561.13;AF:chr11:57753290:57753407-57789037:57761797:57762046-57789037:+	0.478558	0	ENSG00000198561	AF	1500	CTNND1	11	57753243	57819546	1	protein_coding	catenin delta 1 [Source:HGNC Symbol;Acc:HGNC:2515]	http://genome-euro.ucsc.edu/cgi-bin/hgTracks?hgS_doOtherUser=submit&hgS_otherUserName=sjcockell&hgS_otherUserSessionName=SuppaResults&position=chr11:57753243-57819546
ENSG00000198561.13;AF:chr11:57753290:57753407-57789037:57761797:57762119-57789037:+	0.164865	0.0461538	ENSG00000198561	AF	1500	CTNND1	11	57753243	57819546	1	protein_coding	catenin delta 1 [Source:HGNC Symbol;Acc:HGNC:2515]	http://genome-euro.ucsc.edu/cgi-bin/hgTracks?hgS_doOtherUser=submit&hgS_otherUserName=sjcockell&hgS_otherUserSessionName=SuppaResults&position=chr11:57753243-57819546
ENSG00000198561.13;SE:chr11:57762046-57789037:57789155-57791385:+	-0.476022	0.003663	ENSG00000198561	SE	1500	CTNND1	11	57753243	57819546	1	protein_coding	catenin delta 1 [Source:HGNC Symbol;Acc:HGNC:2515]	http://genome-euro.ucsc.edu/cgi-bin/hgTracks?hgS_doOtherUser=submit&hgS_otherUserName=sjcockell&hgS_otherUserSessionName=SuppaResults&position=chr11:57753243-57819546
ENSG00000198561.13;SE:chr11:57762046-57791385:57791673-57794010:+	-0.244267	0.003663	ENSG00000198561	SE	1500	CTNND1	11	57753243	57819546	1	protein_coding	catenin delta 1 [Source:HGNC Symbol;Acc:HGNC:2515]	http://genome-euro.ucsc.edu/cgi-bin/hgTracks?hgS_doOtherUser=submit&hgS_otherUserName=sjcockell&hgS_otherUserSessionName=SuppaResults&position=chr11:57753243-57819546
ENSG00000198815.8;AF:chr1:42311110-42315346:42315459:42311110-42335059:42335215:-	-0.501627	0.00799201	ENSG00000198815	AF	22887	FOXJ3	1	42176539	42335877	-1	protein_coding	forkhead box J3 [Source:HGNC Symbol;Acc:HGNC:29178]	http://genome-euro.ucsc.edu/cgi-bin/hgTracks?hgS_doOtherUser=submit&hgS_otherUserName=sjcockell&hgS_otherUserSessionName=SuppaResults&position=chr1:42176539-42335877
ENSG00000198815.8;AF:chr1:42311110-42315346:42315459:42311110-42335059:42335221:-	-0.320825	0.00799201	ENSG00000198815	AF	22887	FOXJ3	1	42176539	42335877	-1	protein_coding	forkhead box J3 [Source:HGNC Symbol;Acc:HGNC:29178]	http://genome-euro.ucsc.edu/cgi-bin/hgTracks?hgS_doOtherUser=submit&hgS_otherUserName=sjcockell&hgS_otherUserSessionName=SuppaResults&position=chr1:42176539-42335877
ENSG00000198815.8;AF:chr1:42311110-42315346:42315459:42311110-42335059:42335232:-	-0.399452	0.00799201	ENSG00000198815	AF	22887	FOXJ3	1	42176539	42335877	-1	protein_coding	forkhead box J3 [Source:HGNC Symbol;Acc:HGNC:29178]	http://genome-euro.ucsc.edu/cgi-bin/hgTracks?hgS_doOtherUser=submit&hgS_otherUserName=sjcockell&hgS_otherUserSessionName=SuppaResults&position=chr1:42176539-42335877
ENSG00000198815.8;AF:chr1:42311110-42315346:42315459:42311110-42335626:42335877:-	-0.231647	0.00799201	ENSG00000198815	AF	22887	FOXJ3	1	42176539	42335877	-1	protein_coding	forkhead box J3 [Source:HGNC Symbol;Acc:HGNC:29178]	http://genome-euro.ucsc.edu/cgi-bin/hgTracks?hgS_doOtherUser=submit&hgS_otherUserName=sjcockell&hgS_otherUserSessionName=SuppaResults&position=chr1:42176539-42335877
ENSG00000198839.9;A3:chr7:112206807-112286873:112206807-112286877:+	0.145515	0.0284715	ENSG00000198839	A3	11179	ZNF277	7	112206588	112343096	1	protein_coding	zinc finger protein 277 [Source:HGNC Symbol;Acc:HGNC:13070]	http://genome-euro.ucsc.edu/cgi-bin/hgTracks?hgS_doOtherUser=submit&hgS_otherUserName=sjcockell&hgS_otherUserSessionName=SuppaResults&position=chr7:112206588-112343096
ENSG00000204387.12;A5:chr6:31835455-31837236:31835451-31837236:+	-0.106079	0.0424575	ENSG00000204387	A5	50854	C6orf48	6	31834608	31839766	1	protein_coding	chromosome 6 open reading frame 48 [Source:HGNC Symbol;Acc:HGNC:19078]	http://genome-euro.ucsc.edu/cgi-bin/hgTracks?hgS_doOtherUser=submit&hgS_otherUserName=sjcockell&hgS_otherUserSessionName=SuppaResults&position=chr6:31834608-31839766
ENSG00000204387.12;SE:chr6:31835451-31836424:31836517-31837236:+	0.142308	0.0254745	ENSG00000204387	SE	50854	C6orf48	6	31834608	31839766	1	protein_coding	chromosome 6 open reading frame 48 [Source:HGNC Symbol;Acc:HGNC:19078]	http://genome-euro.ucsc.edu/cgi-bin/hgTracks?hgS_doOtherUser=submit&hgS_otherUserName=sjcockell&hgS_otherUserSessionName=SuppaResults&position=chr6:31834608-31839766
ENSG00000204856.11;A5:chr12:110486458-110486534:110486454-110486534:+	-0.118063	0.013986	ENSG00000204856	A5	29902	FAM216A	12	110468364	110490385	1	protein_coding	family with sequence similarity 216 member A [Source:HGNC Symbol;Acc:HGNC:30180]	http://genome-euro.ucsc.edu/cgi-bin/hgTracks?hgS_doOtherUser=submit&hgS_otherUserName=sjcockell&hgS_otherUserSessionName=SuppaResults&position=chr12:110468364-110490385
ENSG00000205572.9;AF:chr5:70025269:70025458-70026407:70025587:70025731-70026407:+	0.164487	0.0499501	ENSG00000205572	AF	8293	SERF1B	5	70025247	70043113	1	protein_coding	small EDRK-rich factor 1B [Source:HGNC Symbol;Acc:HGNC:10756]	http://genome-euro.ucsc.edu/cgi-bin/hgTracks?hgS_doOtherUser=submit&hgS_otherUserName=sjcockell&hgS_otherUserSessionName=SuppaResults&position=chr5:70025247-70043113
ENSG00000205572.9;AL:chr5:70026515-70032315:70032493:70026515-70041524:70042008:+	-0.219612	0.0499501	ENSG00000205572	AL	8293	SERF1B	5	70025247	70043113	1	protein_coding	small EDRK-rich factor 1B [Source:HGNC Symbol;Acc:HGNC:10756]	http://genome-euro.ucsc.edu/cgi-bin/hgTracks?hgS_doOtherUser=submit&hgS_otherUserName=sjcockell&hgS_otherUserSessionName=SuppaResults&position=chr5:70025247-70043113
ENSG00000205572.9;AL:chr5:70026515-70032315:70032493:70026515-70041524:70043113:+	-0.164487	0.0499501	ENSG00000205572	AL	8293	SERF1B	5	70025247	70043113	1	protein_coding	small EDRK-rich factor 1B [Source:HGNC Symbol;Acc:HGNC:10756]	http://genome-euro.ucsc.edu/cgi-bin/hgTracks?hgS_doOtherUser=submit&hgS_otherUserName=sjcockell&hgS_otherUserSessionName=SuppaResults&position=chr5:70025247-70043113
ENSG00000205670.10;AL:chr21:34385644-34388629:34389154:34385644-34399711:34400175:+	-0.315047	0.027972	ENSG00000205670	AL	54065	SMIM11A	21	34375480	34407866	1	protein_coding	small integral membrane protein 11A [Source:HGNC Symbol;Acc:HGNC:1293]	http://genome-euro.ucsc.edu/cgi-bin/hgTracks?hgS_doOtherUser=submit&hgS_otherUserName=sjcockell&hgS_otherUserSessionName=SuppaResults&position=chr21:34375480-34407866
ENSG00000213753.10;A3:chr19:58589114-58589208:58589114-58589211:+	-0.338073	0.038961	ENSG00000213753	A3	65996	CENPBD1P1	19	58573503	58599801	1	transcribed_processed_pseudogene	CENPB DNA-binding domains containing 1 pseudogene 1 [Source:HGNC Symbol;Acc:HGNC:28421]	http://genome-euro.ucsc.edu/cgi-bin/hgTracks?hgS_doOtherUser=submit&hgS_otherUserName=sjcockell&hgS_otherUserSessionName=SuppaResults&position=chr19:58573503-58599801
ENSG00000213923.11;A3:chr22:38297155-38298786:38296686-38298786:-	0.188395	0.023976	ENSG00000213923	A3	1454	CSNK1E	22	38290691	38318084	-1	protein_coding	casein kinase 1 epsilon [Source:HGNC Symbol;Acc:HGNC:2453]	http://genome-euro.ucsc.edu/cgi-bin/hgTracks?hgS_doOtherUser=submit&hgS_otherUserName=sjcockell&hgS_otherUserSessionName=SuppaResults&position=chr22:38290691-38318084
ENSG00000213923.11;AF:chr22:38314169-38317160:38317439:38314169-38317986:38318084:-	0.127199	0.023976	ENSG00000213923	AF	1454	CSNK1E	22	38290691	38318084	-1	protein_coding	casein kinase 1 epsilon [Source:HGNC Symbol;Acc:HGNC:2453]	http://genome-euro.ucsc.edu/cgi-bin/hgTracks?hgS_doOtherUser=submit&hgS_otherUserName=sjcockell&hgS_otherUserSessionName=SuppaResults&position=chr22:38290691-38318084
ENSG00000213923.11;AL:chr22:38296626:38296686-38298786:38298029:38298203-38298786:-	-0.138692	0.042624	ENSG00000213923	AL	1454	CSNK1E	22	38290691	38318084	-1	protein_coding	casein kinase 1 epsilon [Source:HGNC Symbol;Acc:HGNC:2453]	http://genome-euro.ucsc.edu/cgi-bin/hgTracks?hgS_doOtherUser=submit&hgS_otherUserName=sjcockell&hgS_otherUserSessionName=SuppaResults&position=chr22:38290691-38318084
ENSG00000213928.8;RI:chr14:24164063:24164134-24164614:24164955:+	0.225243	0.031968	ENSG00000213928	RI	10379	IRF9	14	24161053	24166565	1	protein_coding	interferon regulatory factor 9 [Source:HGNC Symbol;Acc:HGNC:6131]	http://genome-euro.ucsc.edu/cgi-bin/hgTracks?hgS_doOtherUser=submit&hgS_otherUserName=sjcockell&hgS_otherUserSessionName=SuppaResults&position=chr14:24161053-24166565
ENSG00000213928.8;SE:chr14:24163508-24163878:24163959-24164063:+	0.266903	0	ENSG00000213928	SE	10379	IRF9	14	24161053	24166565	1	protein_coding	interferon regulatory factor 9 [Source:HGNC Symbol;Acc:HGNC:6131]	http://genome-euro.ucsc.edu/cgi-bin/hgTracks?hgS_doOtherUser=submit&hgS_otherUserName=sjcockell&hgS_otherUserSessionName=SuppaResults&position=chr14:24161053-24166565
ENSG00000217801.9;AF:chr1:1063079:1063201-1065830:1064495:1064589-1065830:+	0.175652	0.036963	ENSG00000217801	AF	100288175	AL390719.1	1	1059734	1069355	1	transcribed_unprocessed_pseudogene		http://genome-euro.ucsc.edu/cgi-bin/hgTracks?hgS_doOtherUser=submit&hgS_otherUserName=sjcockell&hgS_otherUserSessionName=SuppaResults&position=chr1:1059734-1069355
ENSG00000227500.9;AF:chr19:1905372:1905439-1914979:1914521:1914544-1914979:+	0.495791	0.0497835	ENSG00000227500	AF	113178	SCAMP4	19	1905214	1926013	1	protein_coding	secretory carrier membrane protein 4 [Source:HGNC Symbol;Acc:HGNC:30385]	http://genome-euro.ucsc.edu/cgi-bin/hgTracks?hgS_doOtherUser=submit&hgS_otherUserName=sjcockell&hgS_otherUserSessionName=SuppaResults&position=chr19:1905214-1926013
ENSG00000227500.9;AF:chr19:1905391:1905439-1914979:1914521:1914544-1914979:+	0.4305	0.0497835	ENSG00000227500	AF	113178	SCAMP4	19	1905214	1926013	1	protein_coding	secretory carrier membrane protein 4 [Source:HGNC Symbol;Acc:HGNC:30385]	http://genome-euro.ucsc.edu/cgi-bin/hgTracks?hgS_doOtherUser=submit&hgS_otherUserName=sjcockell&hgS_otherUserSessionName=SuppaResults&position=chr19:1905214-1926013
ENSG00000227500.9;AF:chr19:1908264:1908635-1914979:1914521:1914544-1914979:+	0.53924	0.0497835	ENSG00000227500	AF	113178	SCAMP4	19	1905214	1926013	1	protein_coding	secretory carrier membrane protein 4 [Source:HGNC Symbol;Acc:HGNC:30385]	http://genome-euro.ucsc.edu/cgi-bin/hgTracks?hgS_doOtherUser=submit&hgS_otherUserName=sjcockell&hgS_otherUserSessionName=SuppaResults&position=chr19:1905214-1926013
ENSG00000228696.8;AL:chr17:46334680:46334837-46352820:46339397:46339774-46352820:-	0.364863	0.02997	ENSG00000228696	AL	51326	ARL17B	17	46274784	46361797	-1	protein_coding	ADP ribosylation factor like GTPase 17B [Source:HGNC Symbol;Acc:HGNC:32387]	http://genome-euro.ucsc.edu/cgi-bin/hgTracks?hgS_doOtherUser=submit&hgS_otherUserName=sjcockell&hgS_otherUserSessionName=SuppaResults&position=chr17:46274784-46361797
ENSG00000235236.1;AF:chr3:48980346-48983727:48983866:48980346-48983895:48983985:-	-0.56988	0.010989	ENSG00000235236	AF	NA	AC137630.2	3	48979918	48983985	-1	antisense_RNA		http://genome-euro.ucsc.edu/cgi-bin/hgTracks?hgS_doOtherUser=submit&hgS_otherUserName=sjcockell&hgS_otherUserSessionName=SuppaResults&position=chr3:48979918-48983985
ENSG00000236104.2;AF:chr6:33316985-33317653:33317735:33316985-33317878:33317942:-	0.182767	0.024975	ENSG00000236104	AF	9278	ZBTB22	6	33314406	33317942	-1	protein_coding	zinc finger and BTB domain containing 22 [Source:HGNC Symbol;Acc:HGNC:13085]	http://genome-euro.ucsc.edu/cgi-bin/hgTracks?hgS_doOtherUser=submit&hgS_otherUserName=sjcockell&hgS_otherUserSessionName=SuppaResults&position=chr6:33314406-33317942
ENSG00000237289.9;A3:chr15:43593271-43594045:43593271-43594183:+	-0.259993	0.0134865	ENSG00000237289	A3	1159	CKMT1B	15	43593054	43604901	1	protein_coding	creatine kinase, mitochondrial 1B [Source:HGNC Symbol;Acc:HGNC:1995]	http://genome-euro.ucsc.edu/cgi-bin/hgTracks?hgS_doOtherUser=submit&hgS_otherUserName=sjcockell&hgS_otherUserSessionName=SuppaResults&position=chr15:43593054-43604901
ENSG00000237289.9;AF:chr15:43593054:43593271-43594045:43593601:43593679-43594045:+	-0.555282	0	ENSG00000237289	AF	1159	CKMT1B	15	43593054	43604901	1	protein_coding	creatine kinase, mitochondrial 1B [Source:HGNC Symbol;Acc:HGNC:1995]	http://genome-euro.ucsc.edu/cgi-bin/hgTracks?hgS_doOtherUser=submit&hgS_otherUserName=sjcockell&hgS_otherUserSessionName=SuppaResults&position=chr15:43593054-43604901
ENSG00000242028.6;A3:chr15:43800784-43801132:43800784-43801518:+	-0.141334	0.0344655	ENSG00000242028	A3	25764	HYPK	15	43796142	43803043	1	protein_coding	huntingtin interacting protein K [Source:HGNC Symbol;Acc:HGNC:18418]	http://genome-euro.ucsc.edu/cgi-bin/hgTracks?hgS_doOtherUser=submit&hgS_otherUserName=sjcockell&hgS_otherUserSessionName=SuppaResults&position=chr15:43796142-43803043
ENSG00000242028.6;SE:chr15:43800784-43801132:43801187-43801518:+	-0.322923	0.00599401	ENSG00000242028	SE	25764	HYPK	15	43796142	43803043	1	protein_coding	huntingtin interacting protein K [Source:HGNC Symbol;Acc:HGNC:18418]	http://genome-euro.ucsc.edu/cgi-bin/hgTracks?hgS_doOtherUser=submit&hgS_otherUserName=sjcockell&hgS_otherUserSessionName=SuppaResults&position=chr15:43796142-43803043
ENSG00000244306.10;AL:chr14:19284653:19284794-19307021:19300150:19304014-19307021:-	0.136868	0.026973	ENSG00000244306	AL	503639	DUXAP10	14	19284653	19337730	-1	transcribed_processed_pseudogene	double homeobox A pseudogene 10 [Source:NCBI gene;Acc:503639]	http://genome-euro.ucsc.edu/cgi-bin/hgTracks?hgS_doOtherUser=submit&hgS_otherUserName=sjcockell&hgS_otherUserSessionName=SuppaResults&position=chr14:19284653-19337730
ENSG00000244306.10;AL:chr14:19307032:19307111-19331482:19330820:19331006-19331482:-	-0.103071	0.032967	ENSG00000244306	AL	503639	DUXAP10	14	19284653	19337730	-1	transcribed_processed_pseudogene	double homeobox A pseudogene 10 [Source:NCBI gene;Acc:503639]	http://genome-euro.ucsc.edu/cgi-bin/hgTracks?hgS_doOtherUser=submit&hgS_otherUserName=sjcockell&hgS_otherUserSessionName=SuppaResults&position=chr14:19284653-19337730
ENSG00000253293.4;A5:chr7:27172173-27172564:27172173-27172818:-	0.27763	0.0454545	ENSG00000253293	A5	3206	HOXA10	7	27170591	27180261	-1	protein_coding	homeobox A10 [Source:HGNC Symbol;Acc:HGNC:5100]	http://genome-euro.ucsc.edu/cgi-bin/hgTracks?hgS_doOtherUser=submit&hgS_otherUserName=sjcockell&hgS_otherUserSessionName=SuppaResults&position=chr7:27170591-27180261
ENSG00000267751.5;AF:chr19:571596-571697:571734:571596-572109:572228:-	-0.204437	0.014985	ENSG00000267751	AF	NA	AC009005.1	19	567210	572228	-1	antisense_RNA		http://genome-euro.ucsc.edu/cgi-bin/hgTracks?hgS_doOtherUser=submit&hgS_otherUserName=sjcockell&hgS_otherUserSessionName=SuppaResults&position=chr19:567210-572228
ENSG00000268790.5;A5:chr19:16578409-16647096:16578409-16647120:-	-0.2386	0.00799201	ENSG00000268790	A5	NA	AC008764.4	19	16577642	16660115	-1	protein_coding		http://genome-euro.ucsc.edu/cgi-bin/hgTracks?hgS_doOtherUser=submit&hgS_otherUserName=sjcockell&hgS_otherUserSessionName=SuppaResults&position=chr19:16577642-16660115
ENSG00000270149.5;SE:chr1:161021487-161022750:161022827-161038880:-	-0.122012	0.023976	ENSG00000270149	SE	NA	AL591806.3	1	160997957	161038962	-1	protein_coding		http://genome-euro.ucsc.edu/cgi-bin/hgTracks?hgS_doOtherUser=submit&hgS_otherUserName=sjcockell&hgS_otherUserSessionName=SuppaResults&position=chr1:160997957-161038962
ENSG00000272721.5;AF:chr3:184134593-184135158:184135181:184134593-184135195:184135238:-	0.201285	0.0264735	ENSG00000272721	AF	NA	AC131235.3	3	184134019	184135238	-1	antisense_RNA		http://genome-euro.ucsc.edu/cgi-bin/hgTracks?hgS_doOtherUser=submit&hgS_otherUserName=sjcockell&hgS_otherUserSessionName=SuppaResults&position=chr3:184134019-184135238
ENSG00000277258.4;A5:chr17:38738595-38738749:38738595-38738753:-	0.100585	0.00899101	ENSG00000277258	A5	7703	PCGF2	17	38733897	38749817	-1	protein_coding	polycomb group ring finger 2 [Source:HGNC Symbol;Acc:HGNC:12929]	http://genome-euro.ucsc.edu/cgi-bin/hgTracks?hgS_doOtherUser=submit&hgS_otherUserName=sjcockell&hgS_otherUserSessionName=SuppaResults&position=chr17:38733897-38749817
ENSG00000277258.4;AF:chr17:38740442-38746468:38746628:38740442-38747879:38748184:-	-0.173648	0.00699301	ENSG00000277258	AF	7703	PCGF2	17	38733897	38749817	-1	protein_coding	polycomb group ring finger 2 [Source:HGNC Symbol;Acc:HGNC:12929]	http://genome-euro.ucsc.edu/cgi-bin/hgTracks?hgS_doOtherUser=submit&hgS_otherUserName=sjcockell&hgS_otherUserSessionName=SuppaResults&position=chr17:38733897-38749817
ENSG00000283196.2;SE:chr2:89562684-89580558:89580635-89581006:-	-0.15979	0.0324675	ENSG00000283196	SE	645166	AC006453.2	2	89542842	89585652	-1	lincRNA		http://genome-euro.ucsc.edu/cgi-bin/hgTracks?hgS_doOtherUser=submit&hgS_otherUserName=sjcockell&hgS_otherUserSessionName=SuppaResults&position=chr2:89542842-89585652
ENSG00000283352.1;SE:chr6:57959111-57961152:57961224-57961321:-	-0.286437	0.0314685	ENSG00000283352	SE	NA	AL021368.4	6	57919912	57961382	-1	processed_transcript		http://genome-euro.ucsc.edu/cgi-bin/hgTracks?hgS_doOtherUser=submit&hgS_otherUserName=sjcockell&hgS_otherUserSessionName=SuppaResults&position=chr6:57919912-57961382
