# Supplementary material for: Androgen-regulated transcription of ESRP2 drives alternative splicing patterns in prostate cancer
Source: eLife journal article supplement (doi:10.7554/elife.47678), 2019-09-03
Supplement: supp [file elife-47678-supp-v1.zip › elife_poa_e47678_Figure_3_source_data_2.xlsx]

## Sheet: HeatMap
	LNCaP double siRNA		CWR22RV1 double siRNA		PNT2 double siRNA		LNCaP single siRNA		CWR22RV1 single siRNA		PC3		LnCap			TCGA Analysis				Exon coordinates		Primer Sequences
	ESRP1&2_a	ESRP1&2_b	ESRP1&2_a	ESRP1&2_b	ESRP1&2_a	ESRP1&2_b	ESRP2_a	ESRP2_b	ESRP2_a	ESRP2_b	ESRP1 Overexp	ESRP2 Overexp	48hr SD vs A	Casodex	AR siRNA	Tumour v normal	Reduced time to BR	T-test p-value (BH adjusted)	∆ Median	Alternative event 1 (hg38)	Alternative event 1 (hg19)	Forward	Reverse
ACSF2	10	10	50	44	20	23	NA	NA	NA	NA	-51	-64	0	0	NA	No change	No change	0.922141	NA	chr17:50461242-50461370	chr17:48538603-48538731	CACAGAGGGTCCCAGAACGAGAGG	CTGCCAGCCGCCACCACTTCATCC
ADAM15	0	0	-15	-17	NA	NA	11	14	0	0	14	18	0	NA	NA	inclusion	inclusion	1.10132e-13	0.0581782	chr1:155061904-155062117	chr1:155034380-155034593	TGCCCGCCTGCACCAGCGACTCT	CCGGCTTGGAGGCAGCGGAACCT
ADAM7	-18.9165	-21	-10	-7	NA	NA	NA	NA	-20	-20	0	14	20	0	NA	NA	NA	NA	NA	chr8:24506091-24506156	chr8:24363604-24363669	CACCATCTTGGTTGTTGTGC	GGATCTGCGATTCCTCTTGA
APLP2	-6.59291	-11	-10	-11	-17	-10	NA	NA	-15	-13	0	0	18	NA	NA	No change	No change	9.70105e-06	0.0401917	chr11:130123612-130123779	chr11:129993507-129993674	CAGAAGCAGCTGTGGATGAG	TCATTGGTTGGCAGAGGAGT
ARFGAP2	-42	-46	-65	-62	-45	-38	NA	NA	-58	-44	24	10	37	NA	NA	inclusion	inclusion	0.0120653	NA	chr11:47172710-47172751	chr11:47194261-47194302	CCTCACCCAAAGCCTCACT	CCGCTCAATCTCACTGAAGC
ARHGEF11	40	64	68	60	22	26	13	17	0	0	-50	-10	NA	8.7	NA	NA	NA	NA	-0.082836	chr1:156939149-156939285	chr1:156908941-156909077	ACAGGAATCTGGCTGAAGATGC	TCTGAGTGGTCGGTGCTTGAGT
ARHGEF12	0	0	-26	-18	0	0	0	0	7	9	5	13	-10	NA	NA	exclusion	No change	0.00105039	NA	chr11:120409394-120409450	chr11:120280103-120280159	TTGAACCGAGAGTCACCAACAG	ACCGTCAGCCCAAATCCATTGT
CEACAM1	13	43	41	53	29	29	NA	NA	NA	NA	-21	-56	30	NA	NA	No change	No change	0.299807	-0.0400211	chr19:42511576-42511628	chr19:43015728-43015780	TTGCTGGCATTGTGATTGGAGTAG	GATGGGGAGGCTGAAGTTGGTT
CTNND1	30	29	NA	NA	NA	NA	NA	NA	-8	-5	NA	NA	-26	9.96	15.64	No change	inclusion	0.00731253	0.0471485	chr11:57789037-57789155	chr11:57556509-57556627	GGAGGAAGAGGTGGCGAAAA	CTGGGGTCCGTTGAGTTTCA
DNM1L	-20.3632	-27	-11	-10	NA	NA	NA	NA	-12	-16	0	0	0	NA	NA	No change	No change	0.00924739	-0.190476	chr12:32738264-32738296	chr12:32891198-32891230	TGATGCTTGTGGGCTAATGA	TCCCGAGCAGATAGTTTTCG
DOCK7	37.3099	42	27	35	13	19	NA	NA	9	13	0	-26	-43	NA	NA	exclusion	exclusion	8.95395e-07	0.0186656	chr1:62544947-62545039	chr1:63010618-63010710	GTTTGGGAGGATCAGTGCAT	AAGCGTCCCGTTAATGTTTG
EIF4A2	-6.09527	-10	0	0	0	0	NA	NA	-4	-1	NA	NA	0	NA	NA	No change	inclusion	8.8577e-06	0.160964	chr3:186788310-186788420	chr3:186506099-186506209	CTCGCGGGATTGATGTGC	TATTCAGCAACAGCGAGCAC
ENAH	-37	-35	-30	-38	0	0	14	17	20	20	17	10	25	29	30.1	inclusion	exclusion	3.36386e-10	NA	chr1:225504991-225505053	chr1:225692693-225692755	AACCAACAAGAAAACCTTGGGAAA	AGTCAAGTCCTTCCGTCTGGA
EPN3	-51	-33	-67	-34	-48	-42	NA	NA	-2	-17	0	56	20	NA	NA	No change	exclusion	0.999164	-0.139679	chr17:50538884-50538964	chr17:48616245-48616325	TCGCCATGAGCCGTGAGGA	TGCAGAAGGCCCCCAGGAGGAT
EXOC7	-17.8399	-24	-20	-19	NA	NA	NA	NA	NA	NA	12.5677	12	31	NA	NA	exclusion	No change	4.53401e-06	NA	chr17:76091143-76091235	chr17:74087224-74087316	TCCGAGTTAAGCACCTGTCC	GGTCTTCTTCTGGTGGTGCT
FLNB	-31	-50	-29	-30	-25	-23	-16	-15	-7	-8	29	67	29	-12.9	-15.75	No change	exclusion	0.515031	-0.0361565	chr3:58141858-58141929	chr3:58127585-58127656	GGCGAAGAAGTAGGCTTTGTGG	GCCGTTCATGTCACTCACTGG
FN1	25	10	44	27	0	0	15	15	50	49	0	0	-19	18.85	NA	No change	exclusion	0.0313975	0.0714286	chr2:215392931-215393203	chr2:216257654-216257926	AGAGCTCCTGCACTTTTGATAACC	TGTACCAGGCAGGAGATTTGT
FNIP1/RAPGEF6	-10	-15	-19	-22	0	0	0	0	0	0	10	0	8	NA	NA	inclusion	exclusion	0.0197541	NA	chr5:131710578-131710661	chr5:131046271-131046354	TCAGGACAACAATACATTAAAGGCTG	CAGACCGTGCTATGCCACTG
GRHL1	-9	-46	-33	-33	0	0	NA	NA	NA	NA	17	36	36	NA	NA	No change	inclusion	0.125598	0.0995893	chr2:9962455-9962531	chr2:10102584-10102660	CAACGATGCCTACCCACTCCA	GATTCCTTCACTGCTGCTCACCTC
INF2	-17	-47	-67	-63	-30	-31	NA	NA	NA	NA	0	39	27	0	NA	inclusion	No change	2.35155e-06	-0.133739	chr14:104715284-104715340	chr14:105181621-105181677	AAGGGGACCGGGAAGCGAAGGAAG	CGGCTGGGTAAGGCACGGAGTTTT
ITGA6	-56	-42	-54	-43	-55	-45	0	0	0	0	7	48	27	-23	NA	exclusion	exclusion	9.36576e-07	-0.0816873	chr2:172501772-172501901	chr2:173366500-173366629	TAGTGGCTATTCTCGCTGGGAT	TGATCTCTCGCTCTTCTTTCCG
KIF13A	-26	-22	-38	-31	0	0	-13	-12	-32	-28	0	36	-19	31	NA	exclusion	exclusion	0.00431223	NA	chr6:17789872-17789910	chr6:17790103-17790141	TGCCACTTATGGTTGAAGCCA	TGCATCTGACCACCTCTCCCTT
MAGI1	33	48	51	34	41	45	39	42	15	17	-32	-15	-40	33.1	27.2	NA	NA	NA	0.152829	chr3:65448022-65448057	chr3:65433697-65433732	AACATCTTGGTTAGACCCTCGG	ACCATAGACAGGGTCTTCAATCTTT
MAP3K7	-17.3001	-20	-14	-24	-18	-15	-14	-40	-13	-16	0	8	18	0	NA	inclusion	inclusion	2.15783e-06	0.0930418	chr6:90544552-90544632	chr6:91254271-91254351	CTGGACGTTTAAGCTTGGGAG	CTGACCAGGTTCTGTTCCAG
MBNL1	15	7	0	0	20	21	0	0	0	0	0	0	0	NA	NA	inclusion	inclusion	5.28308e-07	0.109621	chr3:152455542-152455577	chr3:152173331-152173366	ACAGCATACAGCATTTCTCCCACC	TTGTGGCTAGTCAGATGTTCGGCA
MINK1	-17.0922	-12	-10	-18	-9	-11	NA	NA	NA	NA	0	0	33	NA	NA	inclusion	inclusion	8.36314e-07	NA	chr17:4892402-4892512	chr17:4795697-4795807	TATCGCCACTGCCCTTAACA	GTGAGAGGCTGGAAGGACG
MLPH	23.3833	20	33	32	39	48	NA	NA	NA	NA	-11.7025	-21	-11	-10	NA	No change	exclusion	0.377922	NA	chr2:237534564-237534647	chr2:238443207-238443290	CACCTCTGATGAGGAAAGCA	CCCAACTGATTTGTCCCTGT
MYO6	33.0085	35	0	0	0	0	NA	NA	NA	NA	0	0	-15	0	NA	NA	NA	NA	0.0320565	chr6:75911672-75911698	chr6:76621389-76621415	AGAGCAACGTGCTCCAAAGT	AGTCAGGCCAGTCTCCTCAA
MYH10	56.1706	62	25	22	13	17	NA	NA	NA	NA	0	-17	-52	55.4	22.5	No change	exclusion	0.0326163	NA	chr17:8576643-8576672	chr17:8479961-8479990	CCTTGCCCATGTTGCTTCTT	TCACAGTCTTCGCATTTCCA
MYO1B	32	15	32	15	27	15	0	0	0	0	-22	-10	-15	NA	NA	No change	exclusion	0.571559	-0.0684396	chr2:191400749-191400835	chr2:192265475-192265561	AAGAGGTACCAGCAGACAAAGAGT	TAGAATCCAAGAATAAGTAAGGTC
NUMB	-19	-20	-39	-18	0	0	0	0	12	9	16	27	25	-22.7	NA	exclusion	inclusion	0.000321719	NA	chr14:73316390-73316422	chr14:73783098-73783130	TTGGCCATGTAGAAGTTGATGAATC	TCTGAGTCCATCTGCTGAGACC
OSBPL3	36	33	44	31	43	47	19	15	20	16	-16	-30	-16	NA	NA	No change	no data	0.93438	0.0879996	chr7:24863200-24863292	chr7:24902819-24902911	CTCCTGCAAAGCATGGACGT	GATGAGGTTTCAGAGCCATCAGA
RAC1	-26	-31	-33	-25	0	0	0	0	0	0	0	28	23	0	NA	inclusion	exclusion	9.25726e-07	0.0643343	chr7:6398662-6398718	chr7:6438293-6438349	GGATCCTTTGACAATTATTCTGCCAATG	CGGACATTTTCAAATGATGCAGG
RALGPS2	-14	-26	-25	-21	-35	-25	0	0	14	19	31	22	21	-17	NA	inclusion	exclusion	5.42058e-05	0.144643	chr1:178892230-178892307	chr1:178861365-178861442	GTAGCAGCGATGGTTCTGAACT	TCCTGAGAACACCTTGAATAGTAACA
RPS24	17	23	0	0	7	12	0	0	22	23	-10	-11	-22	17.29	NA	exclusion	exclusion	4.32208e-08	-0.10777	chr10:78040204-78040225	chr10:79799962-79799983	AACGAAAGGAACGCAAGAACAGAA	CACAGTGGCCACAGCTAACATCAT
SLC37A2	-28	-84	NA	NA	-45	-60	0	0	0	0	61	0	66	NA	NA	No change	exclusion	0.0549449	NA	chr11:125086204-125086260	chr11:124956100-124956156	CTGGAAGGTGTCCCTGAGCA	TGAACAAGCAAGAGTCTGAGCA
SLK	-32	-54	-38	-49	-53	-41	-7	-8	18	18	8	37	31	NA	NA	inclusion	exclusion	9.90187e-09	0.211954	chr10:104010816-104010908	chr10:105770574-105770666	GCCAAACGCATCAAAGGAGAAC	TAGCTAACTCTGCCTTCTGCTG
TCIRG1	24	24	68	67	54	54	NA	NA	NA	NA	10	-72	7	NA	NA	No change	exclusion	0.731969	NA	chr11:68050487-68050664	chr11:67817954-67818131	GGGGGCCTGGATGATGAAGAG	TTGTAGCCCGTGCCTGAGTAGAAC
TRIP10	0	0	0	0	-6	-6	20	22	0	0	0	0	10	NA	NA	No change	exclusion	0.0760404	NA	chr19:6746029-6746196	chr19:6746040-6746207	CATGAACCGTGCACCCTCCGACAG	TGGGGGCAAGTGGCTAAAATCCTC
TUFT1	-23.2036	-19	-42	-39	-49	-43	NA	NA	NA	NA	0	20	26	-19.47	-16.4	No change	inclusion	0.793974	NA	chr1:151562091-151562165	chr1:151534567-151534641	GGACAAGTGGCGTGTGTG	AAGCCAGAGAATGACCAGCT
UAP1	-20	-30	-34	-33	-8	-38	-5	-4	0	0	4	33	36	NA	NA	NA	NA	NA	NA	chr1:162592732-162592782	chr1:162562522-162562572	TGCGAGAAGATGAGTTTTCCCC	GGATTGGTACATCATTGGCATCC
VPS39	0	0	-39	-40	-30	-29	0	0	-8	-7	21	29	0	NA	NA	No change	inclusion	0.96418	NA	chr15:42192066-42192098	chr15:42484264-42484296	AGGAATGGCTTCTTGTGGGAAC	AAGTTCTTATTGGATTTCTCTAGTGTCAC
WNK1	36	18	12	8	0	0	0	0	12	16	0	0	0	0	NA	NA	NA	NA	NA	chr12:879573-880031	chr12:988739-989197	AGTCAGCCTCAAGCTCCACAAGTC	CAGATTTTCGGTAATGCCGTTTTG
ZNF207	20.5336	25	0	0	0	0	NA	NA	NA	NA	0	0	-21	NA	NA	exclusion	No change	6.1517e-06	-0.0965718	chr17:32366665-32366757	chr17:30693684-30693776	TTTCAGCGCCAGGTATTCTT	TGGATCAACTTACTGGTTGCAC
