# Supplementary figures and images for: Androgen-regulated transcription of ESRP2 drives alternative splicing patterns in prostate cancer
Source: eLife journal article supplement (doi:10.7554/elife.47678), 2019-09-03

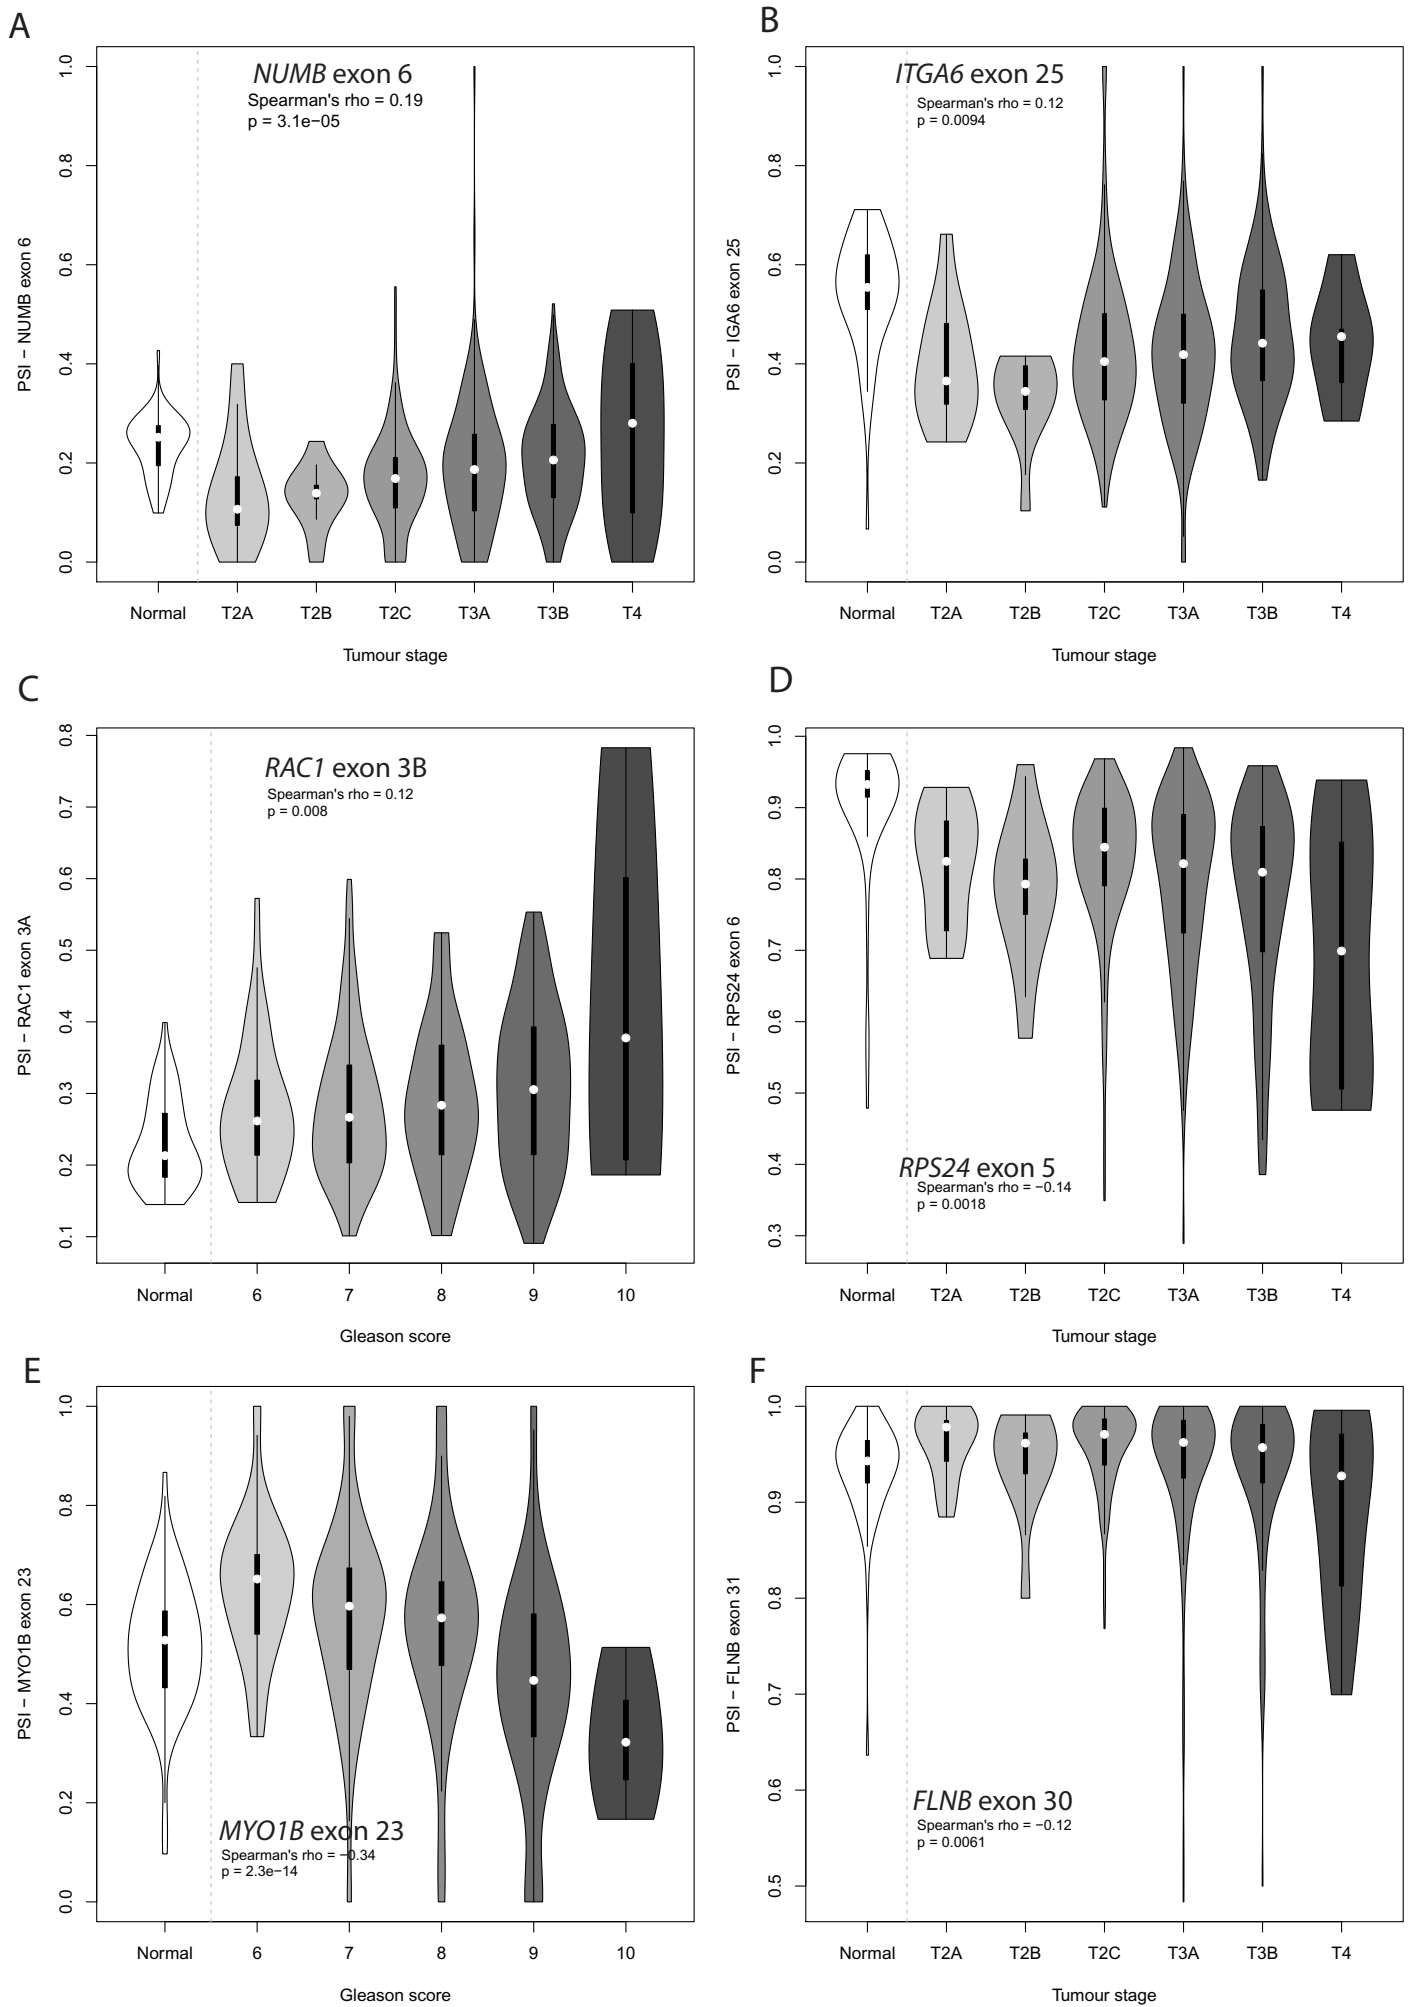

Figure 5 - Figure Supplement 2

Supplement: supp [file elife-47678-supp-v1.zip › elife_poa_e47678_Figure_5_figure_supplement_2.pdf]

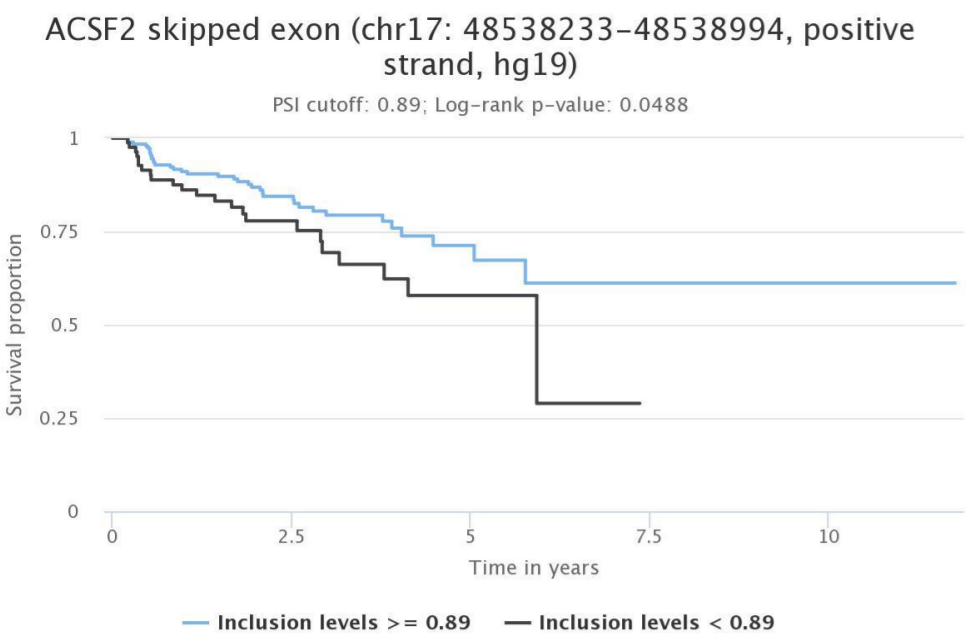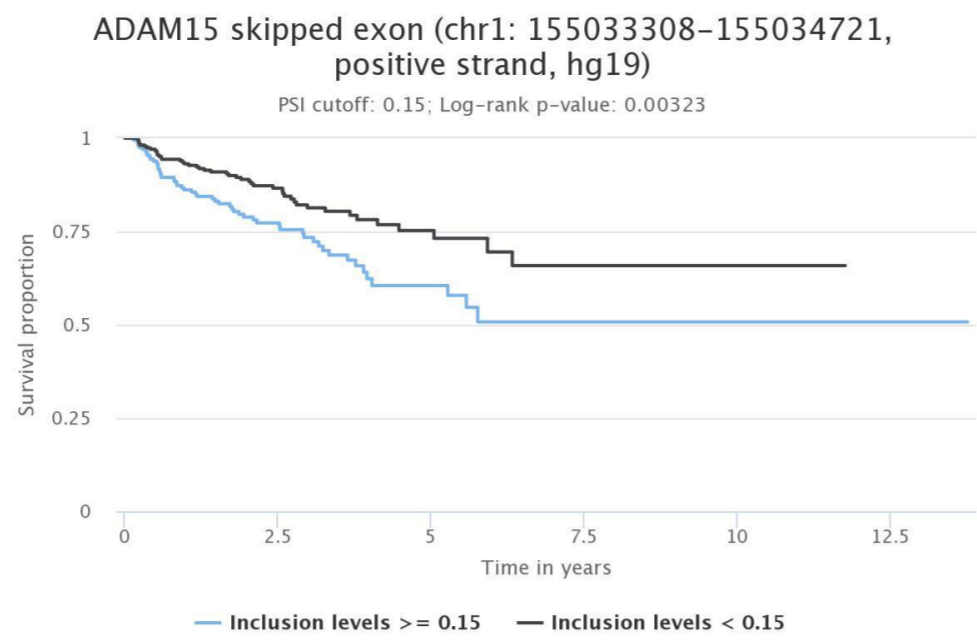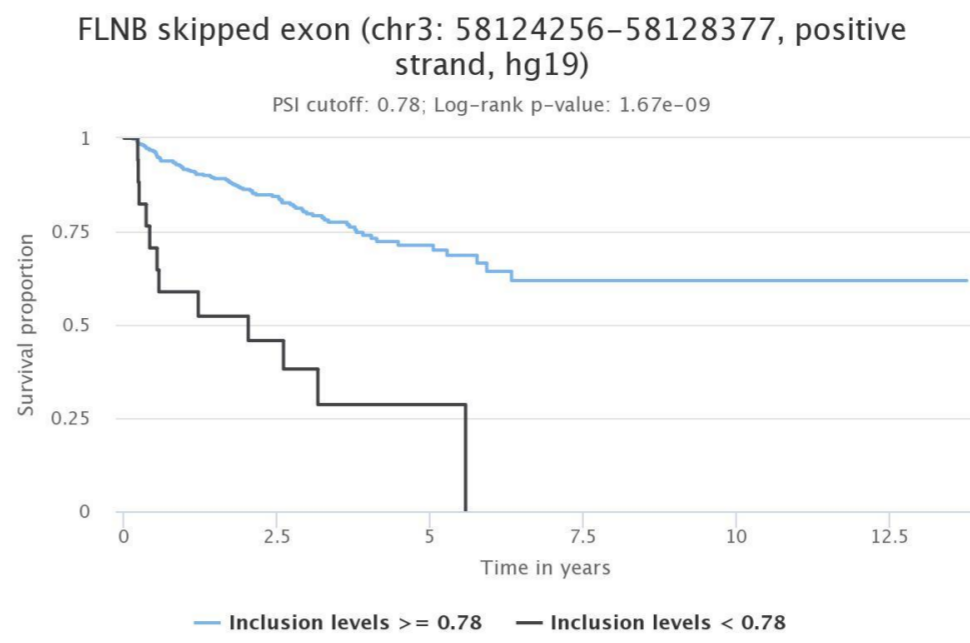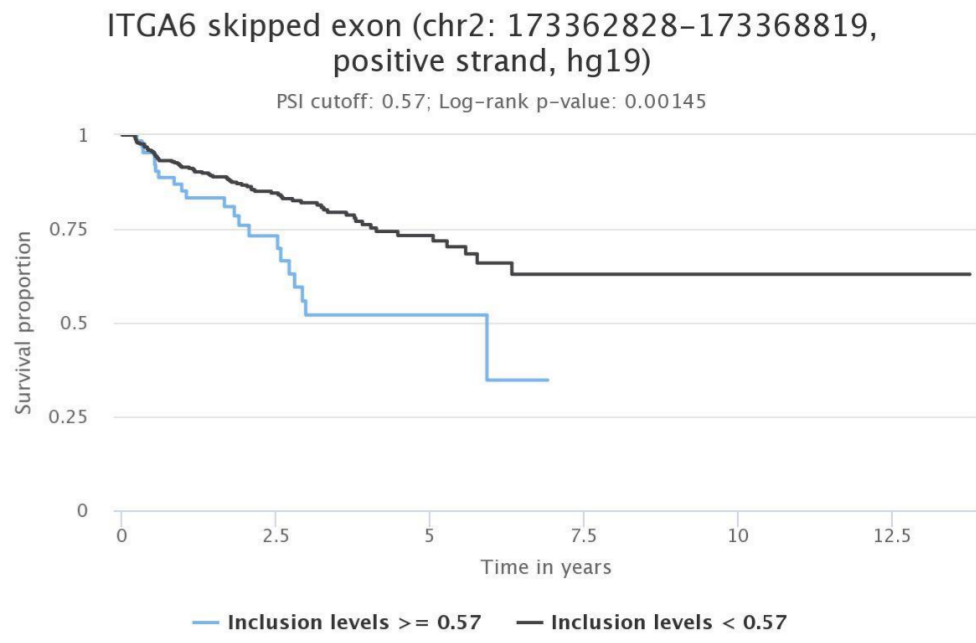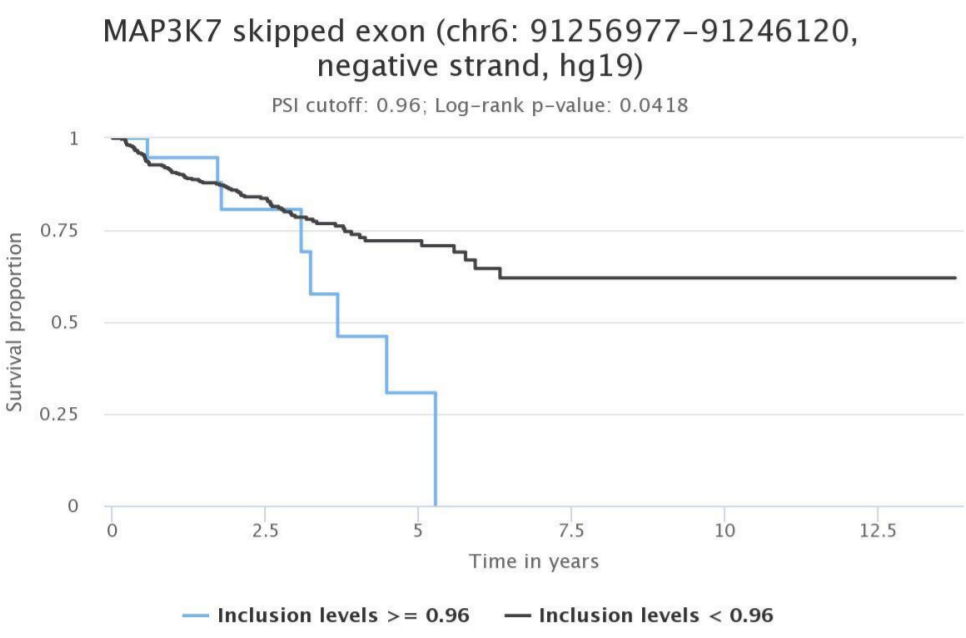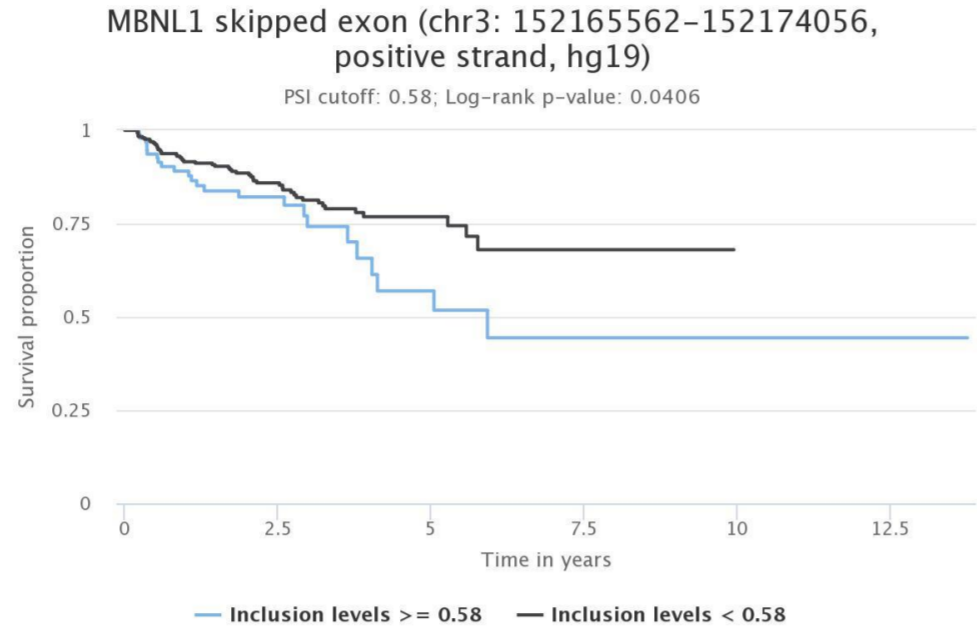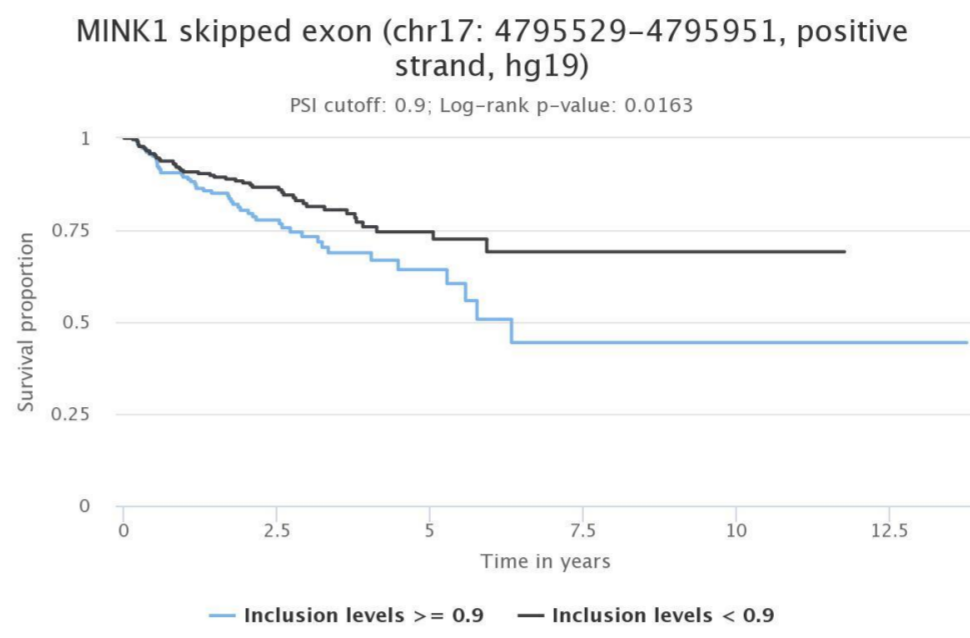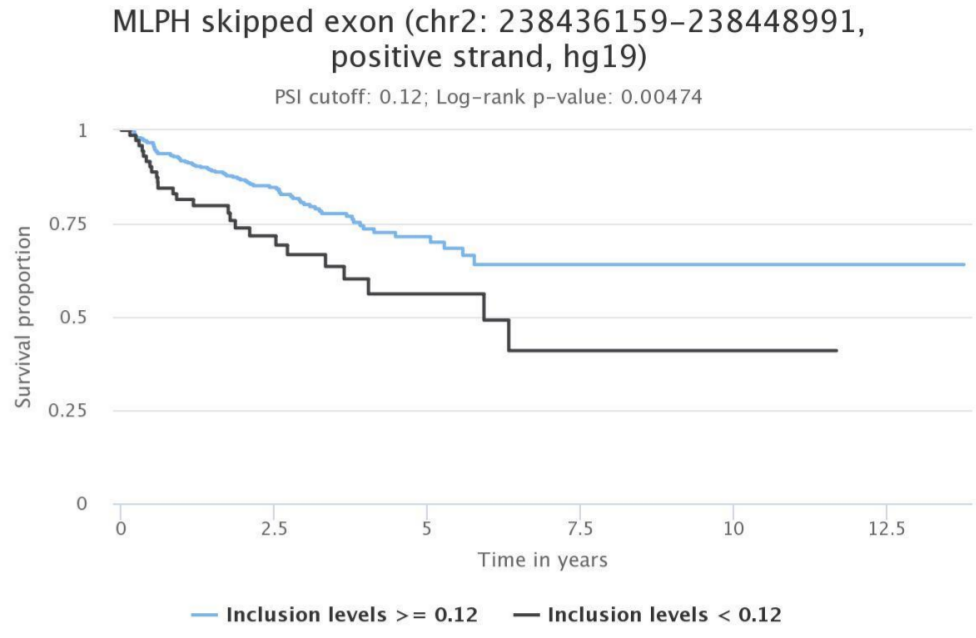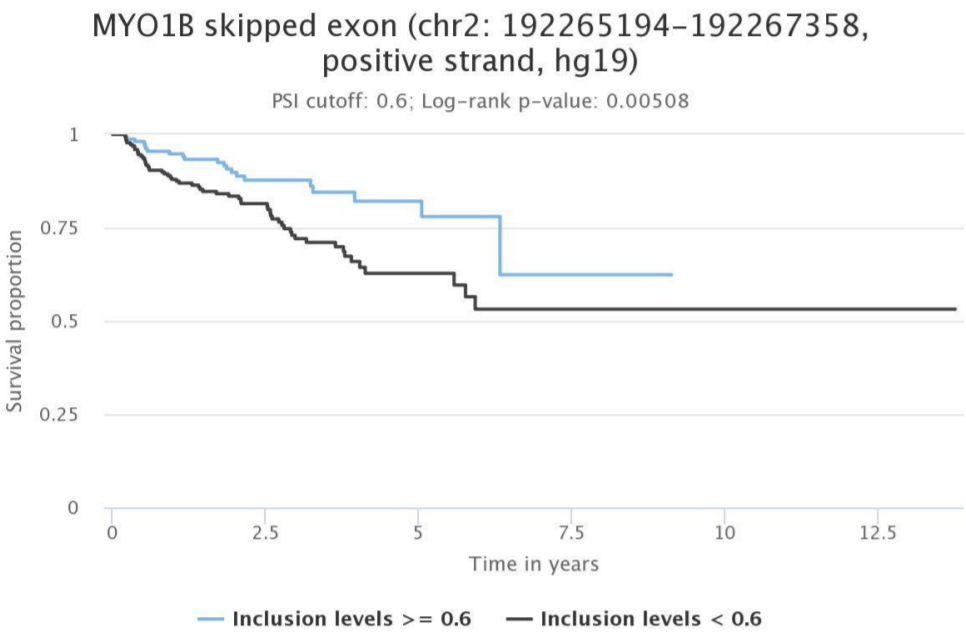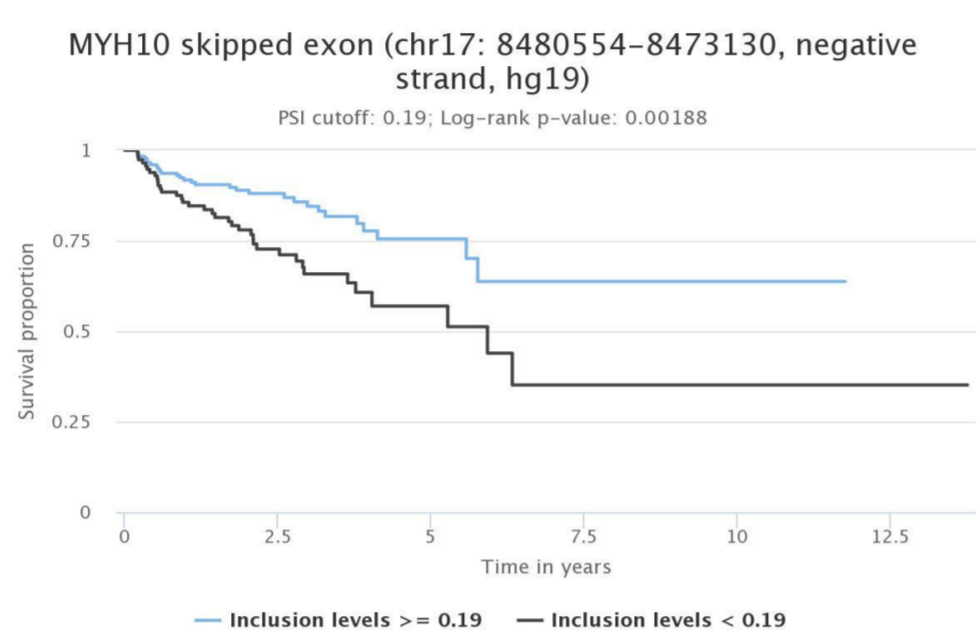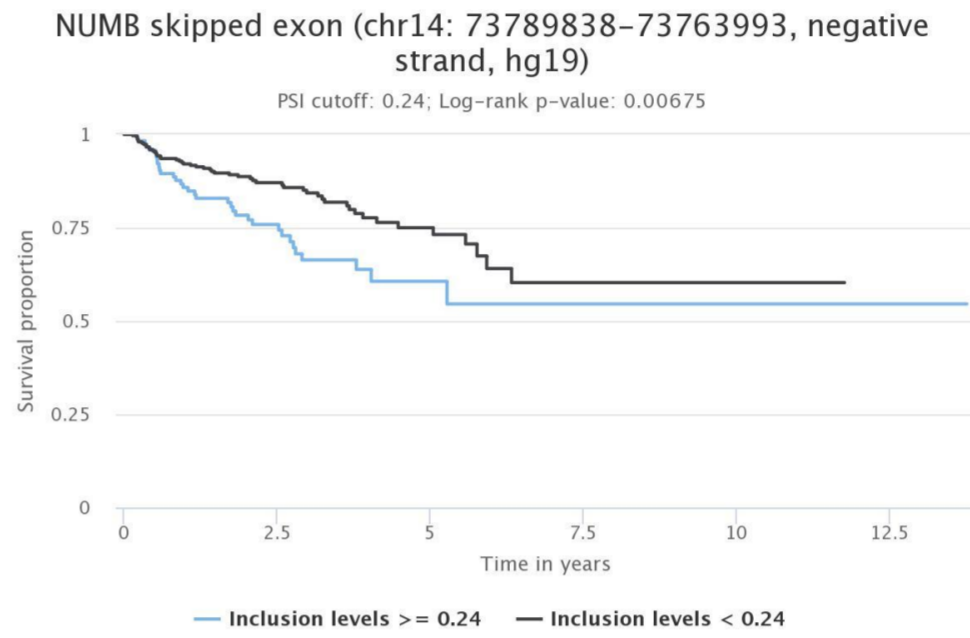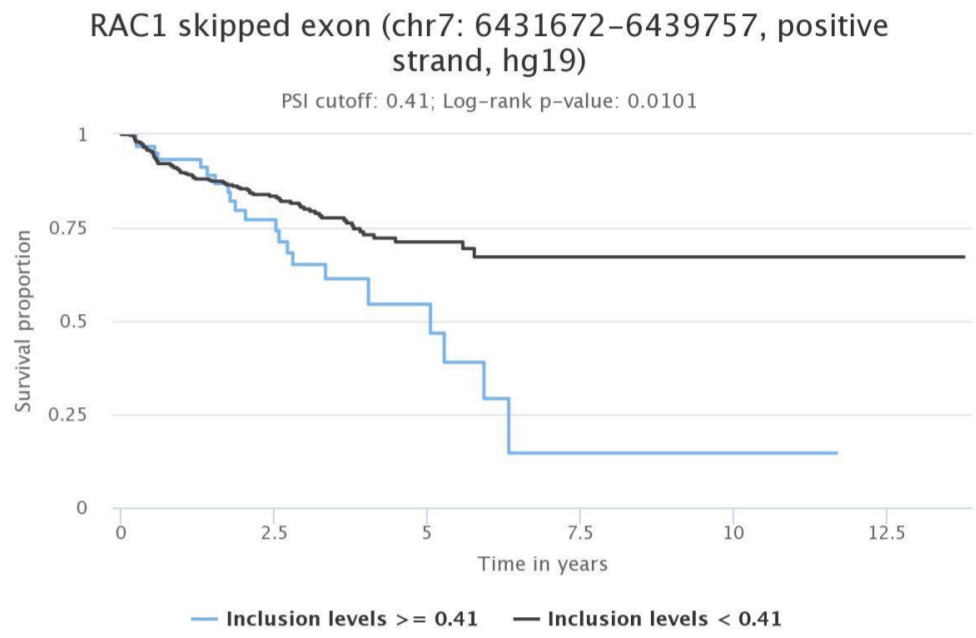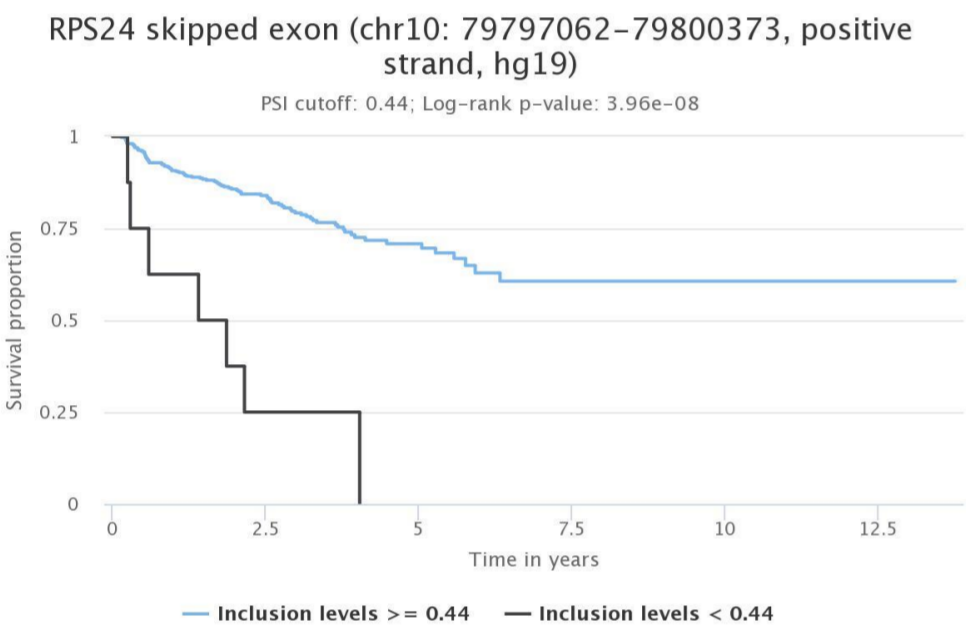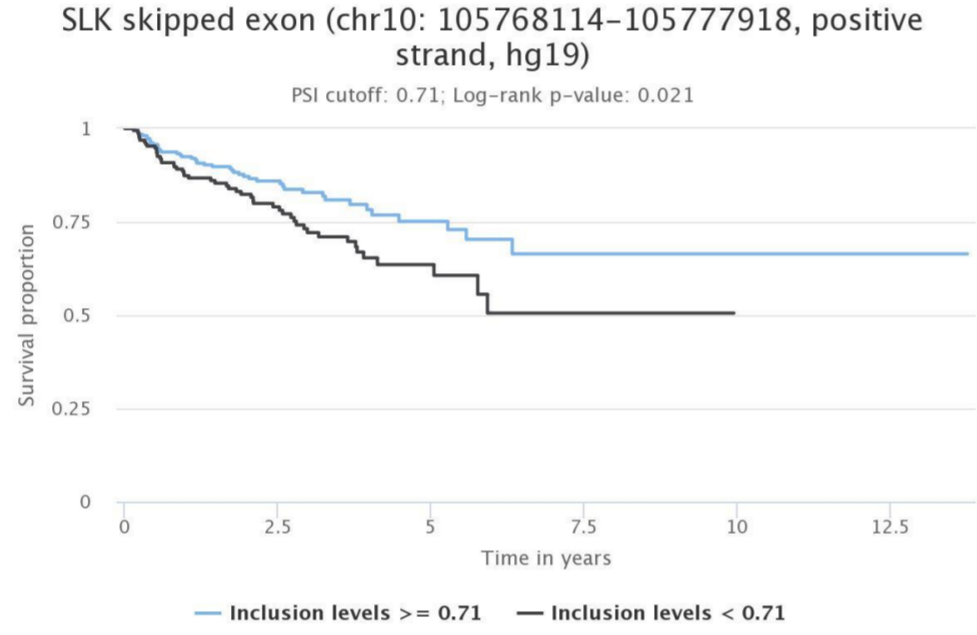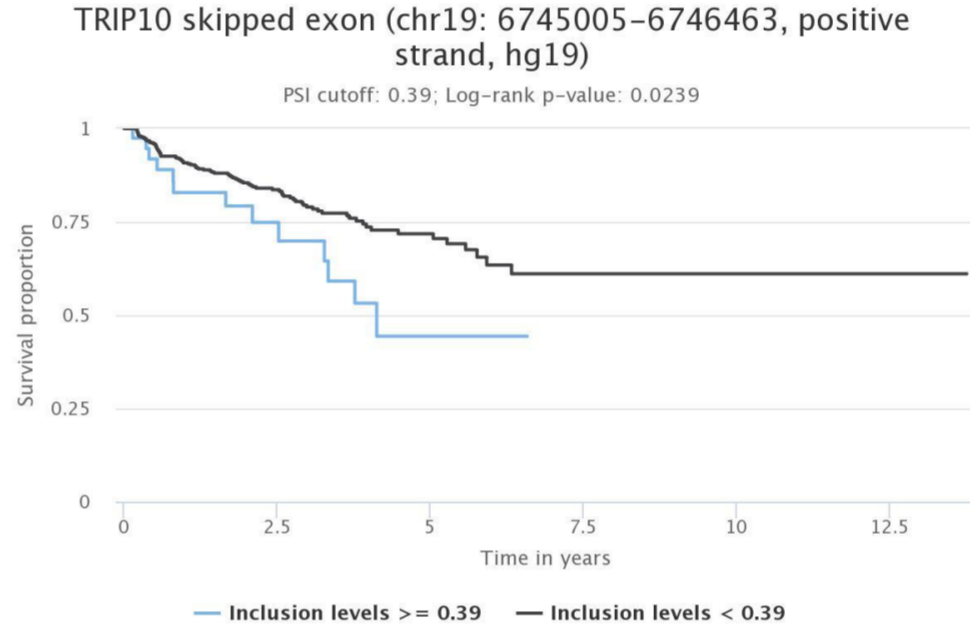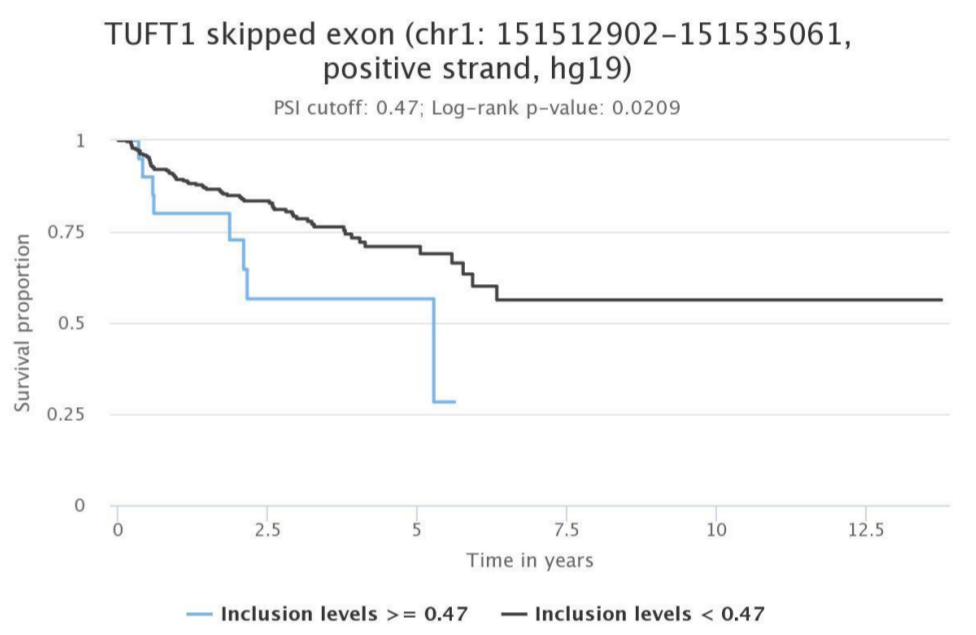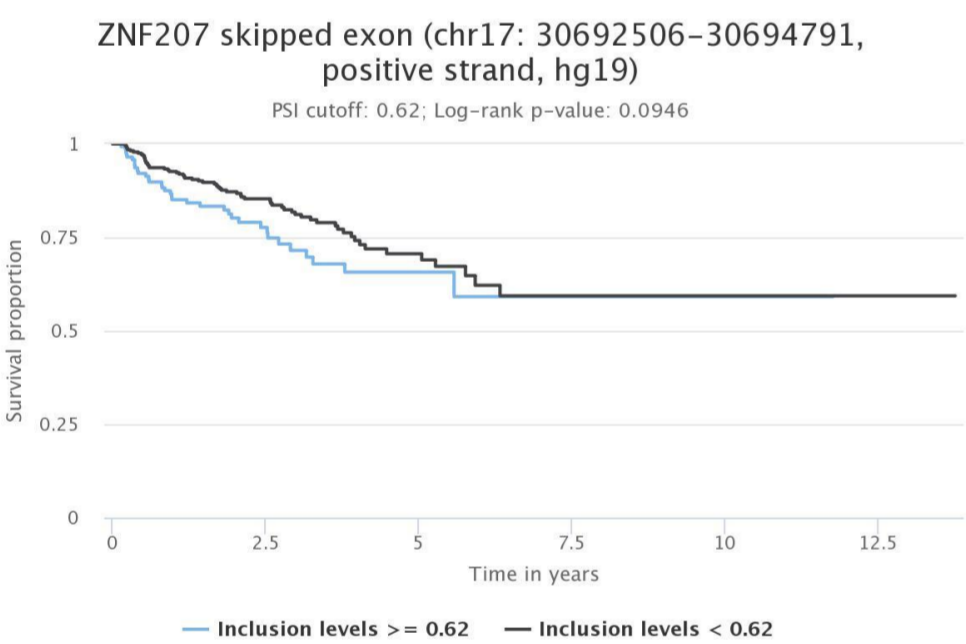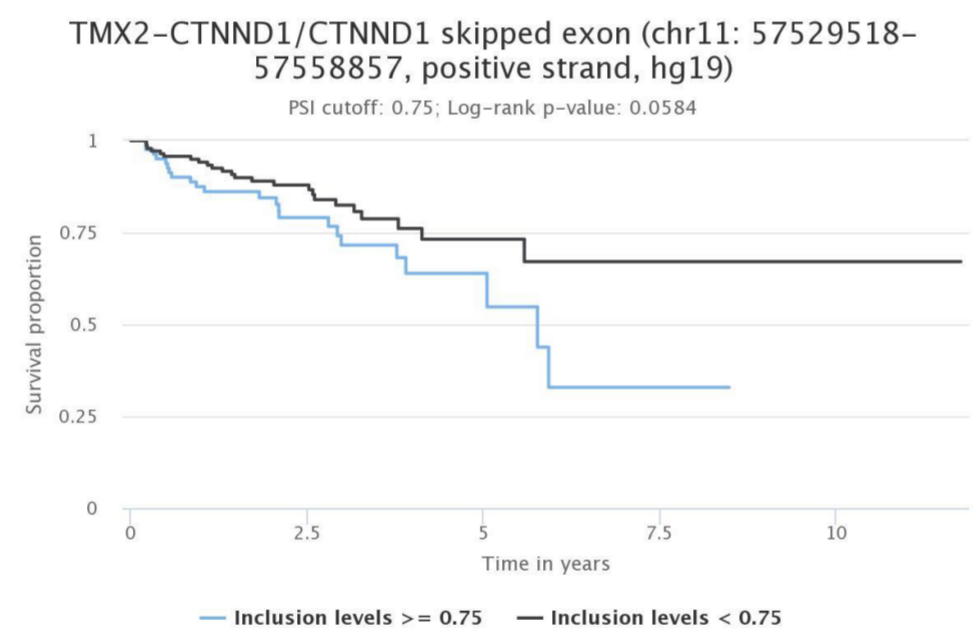

Supplement: supp [file elife-47678-supp-v1.zip › elife_poa_e47678_Figure_5_figure_supplement_1.pdf]

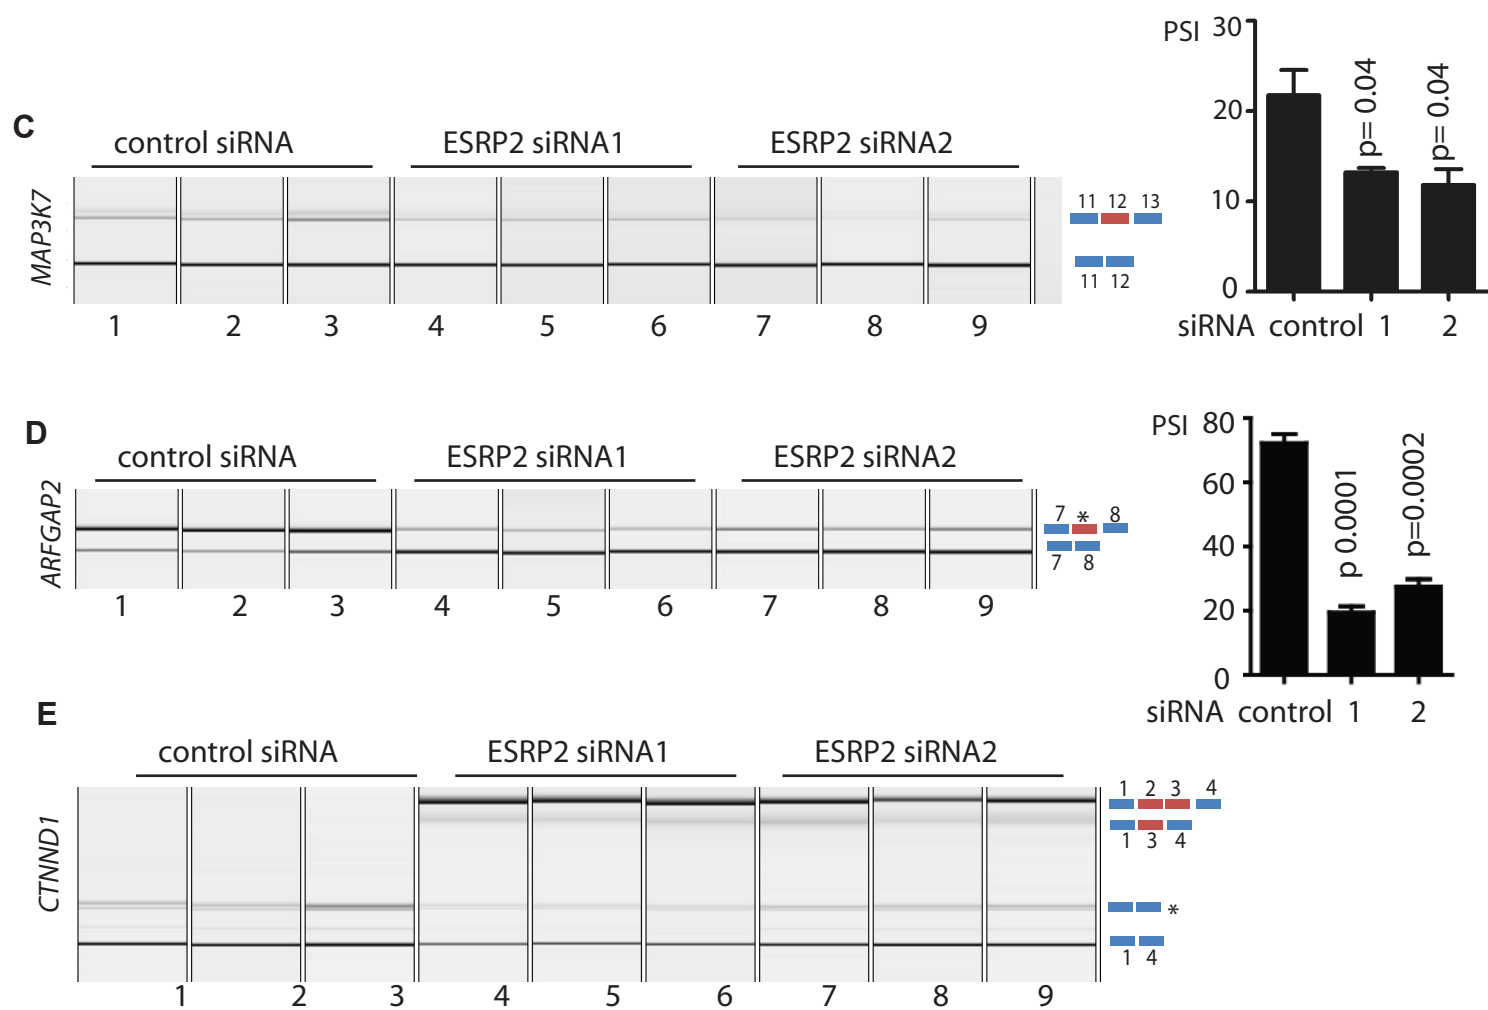

Figure 6 - Figure Supplement 2

Supplement: supp [file elife-47678-supp-v1.zip › elife_poa_e47678_Figure_6_figure_supplement_2.pdf]

**A**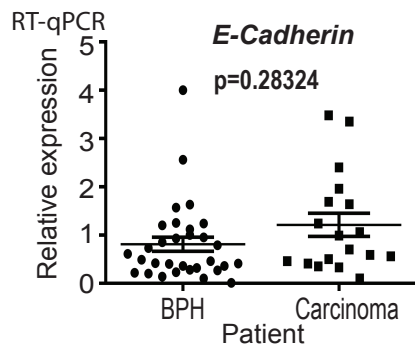**B**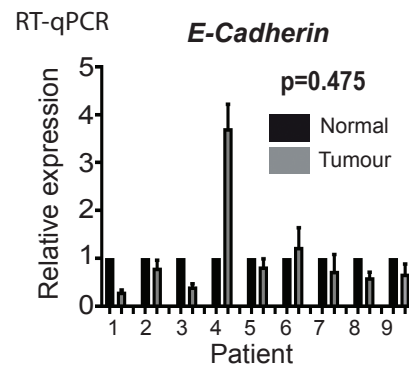

Figure 2- Figure Supplement 1

Supplement: supp [file elife-47678-supp-v1.zip › elife_poa_e47678_Figure_2_figure_supplement_1.pdf]

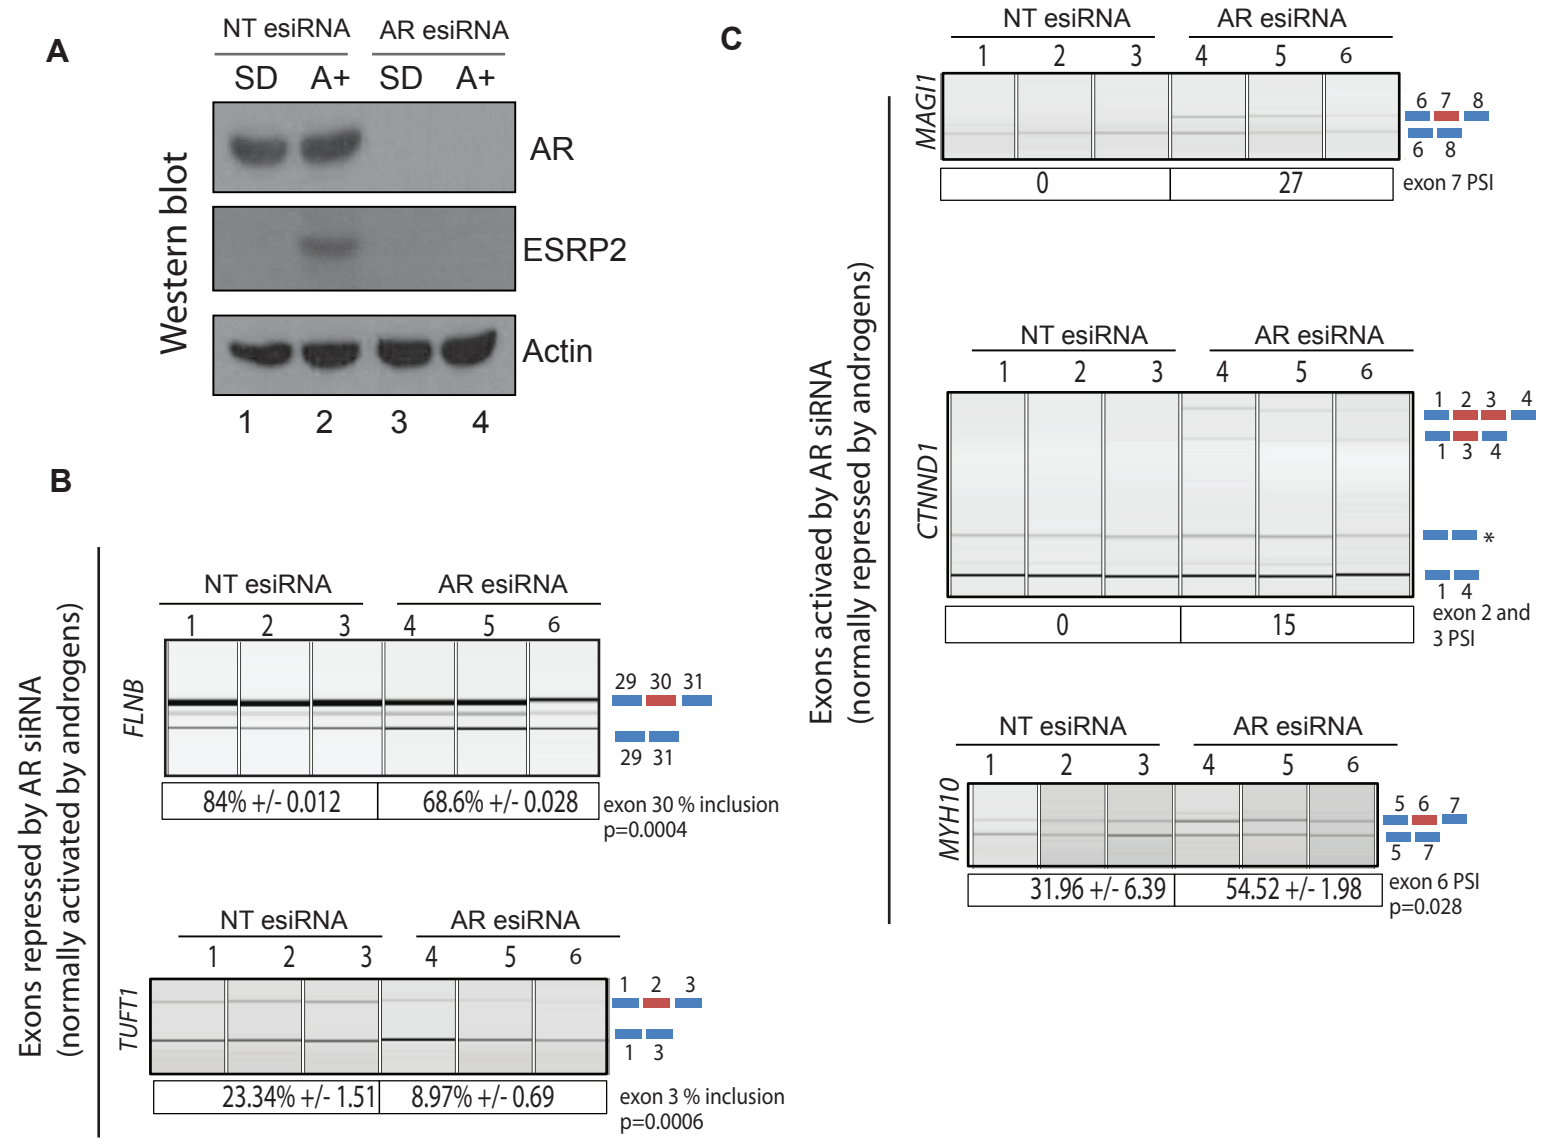

Figure 6- Figure Supplement 1

Supplement: supp [file elife-47678-supp-v1.zip › elife_poa_e47678_Figure_6_figure_supplement_1.pdf]
